# Supplementary material
Source: publisher figshare collection journal article supplement (https://brill.figshare.com/ndownloader/files/34507361)
Supplement: Supplementary file 1 [file 34507361]

## Sheet: Dataset S1
SL. No.	Authors	Year	Year Class	Group	Taxa	Author Participation								Research Subfields									Title	Journal	Vol (issue)	Pages	Article type
						Author Count	Women_first _author	Men_first_author	Women_corresponding	Men_corresponding	Women_present	Total_Women_authors	Women-Men-ratio	TX	Ecol	BH	Div	Con	Dev	Evol	OT	Subfield
1	Hutton, A.F.	1949	1940-49	Reptile	Snakes	1	No	Yes	No	Yes	No	0	0	0	0	0	1	0	0	0	0	Div	Notes on the snakes and mammals of the High Wavy Mountains, Madura District, South India. Part I-Snakes	Journal of the Bombay Natural History Society	48(3)	454-460	Journal article
2	Ramaswami, L.S.	1947	1940-49	Amphibian	Caecilians	1	No	Yes	No	Yes	No	0	0	0	0	0	1	0	0	0	0	Div	Apodous Amphibia of the Eastern Ghats, South India	Current Science	16(1)	2020-08-10	Journal article
3	Srivastava, A.S.	1947	1940-49	Reptile	Lizards	1	No	Yes	No	Yes	No	0	0	0	0	0	0	0	1	0	0	Dev	Cytological observations on the oögenesis of certain Indian lizards. I. Infiltration of cytoplasmic inclusions from the follicle cells into the oöcyte	Transactions of the American Microscopical Society	66(4)	318-327	Journal article
4	Ananthanarayanan, V.	1955	1950-59	Reptile	Mixed	1	No	Yes	No	Yes	No	0	0	0	0	0	0	0	1	0	0	Dev	Nature and distribution of neurosecretory cells of the reptilian brain	Zeitschrift für Zellforschung und Mikroskopische …	43	8-16	Journal article
5	Acharji, M.N.	1958	1950-59	Reptile	Mixed	1	No	Yes	No	Yes	No	0	0	1	0	0	1	0	0	0	0	TXDiv	On a collection of chelonians and snakes from Chota Nagpur, Bihar	Records of the Indian Museum	53(3-4)	383-392	Journal article
6	Mira, K.	1953	1950-59	Amphibian	Frogs	1	Yes	No	Yes	No	Yes	1	1	0	1	0	0	0	0	0	0	Ecol	On Indian tadpoles with a suctorial disc	Records of the Indian Museum	50	359-366	Journal article
7	Uttangi, J.C.	1952	1950-59	Amphibian	Frogs	1	No	Yes	No	Yes	No	0	0	0	0	0	0	0	1	0	0	Dev	On some ciliate parasites of frogs and toads of Karnatak, Bombay Presidency	Records of the Indian Museum	49	139-156	Journal article
8	Kripalani, M.	1953	1950-59	Amphibian	Frogs	1	Yes	No	Yes	No	Yes	1	1	0	1	0	0	0	0	0	0	Ecol	On two remarkable tadpoles from the Darjeeling district.	Everyday Science	2	57-61	Journal article
9	Ramaswami, L.S. and Lakshman, A.B.	1958	1950-59	Amphibian	Frogs	2	No	Yes	No	Yes	No	0	0	0	0	0	0	0	1	0	0	Dev	Ovulation induced in Frog with Mammalian Hormones	Nature	181(4617)	1210-1210	Journal article
10	Kasturirangan, L.R.	1951	1950-59	Reptile	Snakes	1	No	Yes	No	Yes	No	0	0	0	0	0	0	0	1	0	0	Dev	Placentation in the sea-snake,Enhydrina schistosa (Daudin)	Proceedings of the Indian Academy of Science B	34(1)	1-32	Journal article
11	Seshadri, C.	1959	1950-59	Reptile	Snakes	1	Yes	No	Yes	No	Yes	1	1	0	0	0	0	0	1	0	0	Dev	Structural modification of the cloaca of Lycodon aulicus aulicus, Linn., in relation to urine excretion and the presence of sexual segment in the kidney of male	Proceedings of the Indian Academy of Science B	25	271-278	Journal article
12	Bhatnagar, A.N.	1959	1950-59	Reptile	Snakes	1	No	Yes	No	Yes	No	0	0	0	0	0	0	0	1	0	0	Dev	Studies on the structure and behaviour of chromosomes of Oligodon arnensis Shaw (Colubridae: Ophidia)	Cytologia	24(4)	459-465	Journal article
13	Ramaswami, L.S. and Lakshman, A.B.	1959	1950-59	Amphibian	Frogs	2	No	Yes	No	Yes	No	0	0	0	0	0	0	0	1	0	0	Dev	The skipper frog as a suitable embryological animal and an account of the action of mammalian hormones on spawning the same	Proceedings of the National Institute of Science India	25	68-79	Journal article
14	Bhatnagar, A.N.	1957	1950-59	Reptile	Snakes	1	No	Yes	No	Yes	No	0	0	0	0	0	0	0	1	0	0	Dev	The Spermatogonial Chromosomes of The Indian Rat Snake Ptyas mucosus Linn.	Current Science	26(5)	154-155	Journal article
15	Guraya, S.S.	1965	1960-69	Reptile	Snakes	1	No	Yes	No	Yes	No	0	0	0	0	0	0	0	1	0	0	Dev	A histochemical study of follicular atresia in the snake ovary	Journal of Morphology	117(2)	151-169	Journal article
16	Bhatnagar, A.N.	1961	1960-69	Reptile	Snakes	1	No	Yes	No	Yes	No	0	0	0	0	0	0	0	1	0	0	Dev	Chromosome Cytology of a Snake, Lycodon Aulicus L. (Colubridae, Ophidia)	Caryologia	14(1)	35-42	Journal article
17	Bhatnagar, A.N.	1962	1960-69	Reptile	Lizards	1	No	Yes	No	Yes	No	0	0	0	0	0	0	0	1	0	0	Dev	Chromosome Cytology of Two Lizards, Riopa Punctata Gmelin and Hemidactylus Brooki Grey	Caryologia	15(2)	335-349	Journal article
18	Bhatnagar, A.N.	1960	1960-69	Reptile	Snakes	1	No	Yes	No	Yes	No	0	0	0	0	0	0	0	1	0	0	Dev	Chromosomes of Bungarus caeruleus Schneider (Elapidae: Ophidia)	Cytologia	25(2)	173-178	Journal article
19	Pandha, S.K. and Thapliyal, J.P.	1967	1960-69	Reptile	Lizards	2	No	Yes	No	Yes	No	0	0	0	1	0	0	0	1	0	0	EcolDev	Egg Laying and Development in the Garden Lizard, Calotes versicolor	Copeia	1967(1)	121-125	Journal article
20	Mansukhani, M.R. and Murthy, T.S.N.	1964	1960-69	Amphibian	Frogs	2	Yes	No	Yes	Yes	Yes	1	0.5	0	0	0	1	0	0	0	0	Div	Fauna of Rajasthan, Part 6-Amphibia.	Records of the Zoological Survey of India	62(1)	51-60	Journal article
21	Garg, R.K., Pandha, S.K. and Thapliyal, J.P.	1967	1960-69	Reptile	Lizards	3	No	Yes	No	Yes	No	0	0	0	0	0	0	0	1	0	0	Dev	Further studies on the development of eggs of the garden lizard, Calotes versicolor	Copeia	1967(4)	865-867	Journal article
22	Wilson, L.D.	1967	1960-69	Reptile	Snakes	1	No	Yes	No	Yes	No	0	0	1	0	0	0	0	0	0	0	TX	Generic reallocation and review of Coluber fasciolatus Shaw (Serpentes: Colubridae)	Herpetologica	23(4)	260-275	Journal article
23	Annamalai, P.M.	1962	1960-69	Reptile	Lizards	1	No	Yes	No	Yes	No	0	0	0	0	0	0	0	1	0	0	Dev	Gross Morphology and Histology of the Pituitary Gland of Mabuya carinata Boulenger	Journal of the Zoological Society of India	14	194	Journal article
24	Sharma, S.P.	1961	1960-69	Reptile	Mixed	1	No	Yes	No	Yes	No	0	0	0	0	0	0	0	1	0	0	Dev	Histochemical observations on the pigment bodies of the spinal neurones of some reptiles	Experientia	17	125-128	Journal article
25	Sheela, R. and Pandalai, K.R.	1968	1960-69	Reptile	Lizards	2	Yes	No	Yes	Yes	Yes	1	0.5	0	0	0	0	0	1	0	0	Dev	Reaction of the paraventricular nucleus to dehydration in the garden lizard, Calotes versicolor	General and comparative endocrinology	11(2)	257-261	Journal article
26	Singh, G.S.	1968	1960-69	Reptile	Lizards	1	No	Yes	No	Yes	No	0	0	0	1	0	0	0	0	0	0	Ecol	Sexual cycle and secondary sex characters of Indian garden lizard, Calotes versicolor	The Indian Journal of Zootomy	9	1	Journal article
27	Kashyap, H.V. and Nigwekar, V.B.	1964	1960-69	Reptile	Lizards	2	No	Yes	No	Yes	No	0	0	0	0	0	0	0	1	0	0	Dev	The blood vascular system of Riopa guentheri (Peters) Reptilia: Sauria	Proceedings of the Indian Academy of Science B	59(4)	195-210	Journal article
28	Parameswaran, K.N.	1962	1960-69	Reptile	Snakes	1	No	Yes	No	Yes	No	0	0	0	0	0	0	0	1	0	0	Dev	The foetal membranes and placentation ofEnhydris dussumieri (Smith)	Proceedings of the Indian Academy of Science B	56(5)	302-327	Journal article
29	Chacko, T.	1965	1960-69	Amphibian	Frogs	1	Yes	No	Yes	No	Yes	1	1	0	0	0	0	0	1	0	0	Dev	The hyolaryngeal apparatus of two anurans	Acta Zoologica	46(1-2)	83-108	Journal article
30	Srivastava, P.C. and Thapliyal, J.P.	1965	1960-69	Reptile	Snakes	2	No	Yes	No	Yes	No	0	0	0	1	0	0	0	1	0	0	EcolDev	The male sexual cycle of the chequered water snake, Natrix piscator	Copeia	1965(4)	410-415	Journal article
31	Mulherkar, L. and Ahtavale, M.V.	1968	1960-69	Reptile	Lizards	2	Yes	No	Yes	Yes	Yes	1	0.5	0	0	0	0	0	1	0	0	Dev	The Nature of Fluid in the Egg of Calotes versicolor	Current Science	37(19)	562-563	Journal article
32	Church, G.	1963	1960-69	Amphibian	Frogs	1	No	Yes	No	Yes	No	0	0	0	1	0	0	0	0	0	0	Ecol	The variations of dorsal pattern in Rhacophorus leucomystax	Copeia	1963(2)	400-405	Journal article
33	Baby, T.G., Goel,S.C. and Reddy S.R.R.	1976	1970-79	Reptile	Lizards	3	No	Yes	No	Yes	No	0	0	0	0	0	0	0	1	0	0	Dev	A comparative study of arginase activity in lizards	Physiological and Biochemical Zoology	49(3)	286-291	Journal article
34	Rao, P.D.P. and Subhedar, N.	1977	1970-79	Reptile	Lizards	2	No	Yes	No	Yes	No	0	0	0	0	0	0	0	1	0	0	Dev	A cytoarchitectonic study of the hypothalamus of the lizard, Calotes versicolor	Cell and tissue research	180	63-85	Journal article
35	Pillai, R.S.	1978	1970-79	Amphibian	Frogs	1	No	Yes	No	Yes	No	0	0	1	0	0	0	0	0	0	0	TX	A new frog of the genus Micrixalus Boul. from Wynad, S. India	Proceedings of the Indian Academy of Science B	87(6)	173-177	Journal article
36	Gans, C.	1978	1970-79	Reptile	Snakes	1	No	Yes	No	Yes	No	0	0	0	0	0	0	0	0	1	1	EvolOT	All animals are interesting!	American Zoologist	18	2020-09-03	Journal article
37	Pillai, R.S. and Chanda, K.	1971	1970-79	Amphibian	Mixed	2	No	Yes	No	Yes	No	0	0	1	0	0	1	0	0	0	0	TXDiv	Amphibian Fauna of Garo Hills, Meghalaya with Description of a New Species of Rana	Records of the Zoological Survey of India	79	159-168	Journal article
38	Duda, P.L. and Sahi D.N.	1977	1970-79	Herpetofauna	Mixed	2	No	Yes	No	Yes	No	0	0	0	0	0	1	0	0	0	0	Div	An updated checklist of reptiles of jammu and Kashmir	Jammu and Kashmir University Review	6	2020-07-01	Journal article
39	Pitchappan, R.M. and Muthukkaruppan, V.R.	1977	1970-79	Reptile	Lizards	2	No	Yes	No	Yes	No	0	0	0	0	0	0	0	1	0	0	Dev	Analysis of the development of the lizard, Calotes versicolor. II. Histogenesis of the thymus	Developmental & Comparative Immunology	1(3)	217-229	Journal article
40	Gupta, S.C., Garg, R.K. and Thapliyal, J.P.	1977	1970-79	Reptile	Snakes	3	No	Yes	No	Yes	No	0	0	0	0	0	0	0	1	0	0	Dev	Annual variation and role of male hormone in the renal β-glucuronidase activity of the chequered water snake, Natrix piscator	General and comparative endocrinology	31(1)	12-16	Journal article
41	Gans, C., Dessauer, H.C. and Baic, D.	1978	1970-79	Reptile	Snakes	3	No	Yes	No	Yes	No	0	0	0	0	0	0	0	0	1	0	Evol	Axial differences in the musculature of uropeltid snakes: the freight-train approach to burrowing	Science	199(4325)	189-192	Journal article
42	Khanna, S.S. and Kumar, S.	1975	1970-79	Reptile	Lizards	2	No	Yes	No	Yes	No	0	0	0	0	0	0	0	1	0	0	Dev	Blood glucose in the common Indian sand lizard Uromastix hardwicki	Copeia	1975(1)	767-771	Journal article
43	Khanna, S.S. and Kumar, S.	1974	1970-79	Reptile	Lizards	2	No	Yes	No	Yes	No	0	0	0	0	0	0	0	1	0	0	Dev	Cellular composition of the islets of Langerhans in the Indian sand-lizard Uromastix hardwickii	Acta Anatomica	88(1)	67-75	Journal article
44	Singh, L.	1974	1970-79	Reptile	Snakes	1	No	Yes	No	Yes	No	0	0	0	0	0	0	0	1	0	0	Dev	Chromosomes of six species of Indian snakes.	Herpetologica	30(4)	419-429	Journal article
45	Singh, B. and Prasad, B.	1970	1970-79	Reptile	Lizards	2	No	Yes	No	Yes	No	0	0	0	1	1	0	0	0	0	0	EcolBH	Courtship and copulation in Indian garden lizard, Calotes versicolor	Indian Journal of Zootomy	11	100-103	Journal article
46	Stephen, S. and Rao, K.N.A.	1979	1970-79	Reptile	Mixed	2	No	Yes	No	Yes	No	0	0	0	1	0	0	0	0	0	0	Ecol	Coxiellosis in reptiles of South Kanara district, Karnataka.	Indian Journal of Medical Research	70	937-941	Journal article
47	Ray-Chaudhuri, S.P. and Singh L.	1972	1970-79	Reptile	Snakes	2	No	Yes	No	Yes	No	0	0	0	0	0	0	0	1	1	0	DevEvol	Dna-Replication Pattern in Sex-Chromosomes of Snakes	The Nucleus	15	200-210	Journal article
48	Rao, M.V.S. and Rajabai, B.S.	1972	1970-79	Reptile	Lizards	2	No	Yes	No	Yes	No	0	0	0	1	0	0	0	0	0	0	Ecol	Ecological aspects of the agamid lizards Sitana ponticeriana and Calotes nemoricola in India	Herpetologica	28(3)	285-289	Journal article
49	Jayaram, K.C.	1974	1970-79	Herpetofauna	Mixed	1	No	Yes	No	Yes	No	0	0	0	1	0	1	0	0	0	0	EcolDiv	Ecology and distribution of fresh-water fishes, amphibia and reptiles	Ecology and biogeography in India	23	517-584	Journal article
50	Thapliyal, J.P., Kumar, D.S. and Garg, R.K.	1974	1970-79	Reptile	Snakes	3	No	Yes	No	Yes	No	0	0	0	0	0	0	0	1	0	0	Dev	Effect of Castration and of Male Hormone Administrotion on the Tissue Respiration and Thyroid Activity of the Checkered Water Snake, Natrix piscator	General and Comparative Endocrinology	22(3)	308-311	Journal article
51	Reddy, P.R.K and Prasad, M.R.N.	1970	1970-79	Reptile	Lizards	2	No	Yes	No	Yes	No	0	0	0	0	0	0	0	1	0	0	Dev	Effect of gonadotropins and testosterone on the initiation of spermatogenesis in the hypophysectomised Indian house lizard, Hemidactylus flaviviridis Ruppell	Journal of Experimental Zoology	174(2)	205-214	Journal article
52	Singh, R. and Kar, I.	1979	1970-79	Reptile	Snakes	2	No	Yes	Yes	Yes	Yes	1	0.5	0	0	0	0	0	1	0	0	Dev	Effect of parathyroidectomy in the water snake, Natrix piscator.	General and comparative endocrinology	39(3)	411-413	Journal article
53	Kasinathan, S., Basu, S.L. and Sriramulu, V.	1974	1970-79	Amphibian	Frogs	3	No	Yes	No	Yes	No	0	0	0	0	0	0	0	1	0	0	Dev	Effect of pituitary extracts on the hypophysial gonadotrophes and its relation to the spermatogenesis in Rana hexadactyla Lesson	Journal of Experimental Zoology	187(2)	233-238	Journal article
54	Thapliyal, J.P. and Kaur, R.J.	1976	1970-79	Reptile	Snakes	2	No	Yes	No	No	No	0	0	0	0	0	0	0	1	0	0	Dev	Effect of thyroidectomy, l-thyroxine and temperature on hemopoiesis in the chequered water snake, Natrix piscator	General and comparative endocrinology	30(2)	182-188	Journal article
55	Gupta, S.C., Thapliyal, J.P. and Garg, R.K.	1975	1970-79	Reptile	Snakes	3	No	Yes	No	Yes	No	0	0	0	0	0	0	0	1	0	0	Dev	Effects of thyroid hormone on the chemical constituents of different tissues of the chequered water-snake, Natrix piscator	General and comparative endocrinology	27(2)	223-229	Journal article
56	Thapliyal, J.P., Gupta, S.C. and Garg, R.K.	1974	1970-79	Reptile	Snakes	3	No	Yes	No	Yes	No	0	0	0	0	0	0	0	1	0	0	Dev	Effects of thyroidectomy on the chequered water-snake, Natrix piscator	Journal of Endocrinology	60(3)	517-524	Journal article
57	Ray-Chaudhuri, S.P., Singh L. and Sharma T.	1971	1970-79	Reptile	Snakes	3	No	Yes	No	Yes	No	0	0	0	0	0	0	0	1	1	0	DevEvol	Evolution of sex-chromosomes and formation of W-chromatin in snakes	Chromosoma	33(3)	239-251	Journal article
58	Biswas S. and Sanyal D.P.	1977	1970-79	Reptile	Mixed	2	No	Yes	No	Yes	No	0	0	0	0	0	1	0	0	0	0	Div	Fauna of Rajasthan, India, Part: Reptilia	Records of the Zoological Survey of India	73	247-269	Journal article
59	Sharma, V.K., Kaura, Y.K. and Singh, I.P.	1974	1970-79	Amphibian	Frogs	3	No	Yes	No	Yes	No	0	0	0	1	0	0	0	0	0	0	Ecol	Frogs as carriers of Salmonella and Edwardsiella	Antonie Van Leeuwenhoek	40	171-175	Journal article
60	Whitaker R.	1979	1970-79	Reptile	Crocodile	1	No	Yes	No	Yes	No	0	0	0	0	0	0	1	0	0	0	Con	Future of Crocodiles in Tamil Nadu, Indian	Indian Forester	105(8)	592-593	Journal article
61	Sahi D.N and Duda P.L.	1978	1970-79	Reptile	Snakes	2	No	Yes	No	Yes	No	0	0	0	1	0	0	0	0	0	0	Ecol	Gedrag van Natrix piscator in gerangenschap	Lacerta	36(1)	119	Journal article
62	Kameswaran, S. and Kumar, P.V.R.	1976	1970-79	Reptile	Mixed	2	No	Yes	No	Yes	No	0	0	0	0	1	0	0	0	0	0	BH	Hearing in fishes and reptiles	The Journal of the All India Institute of Speech and Hearing	7	66-71	Journal article
63	Kaur, R.J. and Thapliyal, J.P.	1975	1970-79	Reptile	Snakes	2	No	No	No	No	No	0	0	0	0	0	0	0	1	0	0	Dev	Hemopoietic response to male hormone in the chequered water-snake, Natrix piscator	General and comparative endocrinology	27(2)	203-208	Journal article
64	Guraya, S.S.	1971	1970-79	Reptile	Lizards	1	No	Yes	No	Yes	No	0	0	0	0	0	0	0	1	0	0	Dev	Histochemical observations on the lizard spermiogenesis	Acta Anatomica	79(2)	270-279	Journal article
65	Guraya, S.S.	1974	1970-79	Reptile	Snakes	1	No	Yes	No	Yes	No	0	0	0	0	0	0	0	1	0	0	Dev	Histochemical observations on the seminiferous epithelium of the snake testis	Cells Tissues Organs	87(3)	345-351	Journal article
66	Banerjee, T.K. and Mittal, A.K.	1978	1970-79	Reptile	Snakes	2	No	Yes	No	Yes	No	0	0	0	0	0	0	0	1	0	0	Dev	Histochemistry of the epidermis of the chequered water snake Natrix piscator (Colubridae, Squamata)	Journal of Zoology	185(4)	415-435	Journal article
67	Reddy, P.R.K. and Prasad, M.R.N.	1970	1970-79	Reptile	Lizards	2	No	Yes	No	Yes	No	0	0	0	0	0	0	0	1	0	0	Dev	Hormonal control of the maintenance of spermatogenesis and sexual segment in the Indian house lizard Hemidactylus flaviviridis Ruppell	General and comparative endocrinology	14(1)	15-24	Journal article
68	Haider, S. and Sathyanesan, A.G.	1974	1970-79	Reptile	Lizards	2	No	Yes	No	Yes	No	0	0	0	0	0	0	0	1	0	0	Dev	Hypothalamo-hypophysial neurosecretory and portal system of the Indian wall lizard, Hemidactylus flaviviridis	Acta Anatomica	88(4)	502-519	Journal article
69	Padgaonkar, A.S. and Rangneker, P.V.	1972	1970-79	Reptile	Snakes	2	No	Yes	No	Yes	No	0	0	0	0	0	0	0	1	0	0	Dev	Influence of ablation of the endocrine organs on the course of pancreatic diabetes in the water snake,Natrix piscator (Russell)	Proceedings of the Indian Academy of Science B	75(2)	65-76	Journal article
70	Mohanty-Hejmadi, P., Dutta, S.K. and Mallick, S.C.	1979	1970-79	Amphibian	Frogs	3	Yes	No	Yes	No	Yes	1	0.33	0	1	0	0	0	0	0	0	Ecol	Life History of Indian frogs II. The marbled balloon frog Uperodon systoma Schneider	Journal of Zoological Society of India	31	65-72	Journal article
71	Mohanty-Hejmadi, P., Dutta, S.K. and Parida, S.	1979	1970-79	Amphibian	Frogs	3	Yes	No	Yes	No	Yes	2	0.66	0	1	0	0	0	0	0	0	Ecol	Life history of the Indian frogs: I. The burrowing frog Rana breviceps Schneider	Journal of Zoological Society of India	31(1-2)	29-37	Journal article
72	Shivanandappa, T. and Sarkar, H.B.D.	1977	1970-79	Reptile	Lizards	2	No	Yes	No	Yes	No	0	0	0	0	0	0	0	1	0	0	Dev	Localization of Some Steroidogenic Enzymes in the Testis of the Indian Bloodsucker, Calotes versicolor (Sauria: Agamidae)	Herpetologica	33(3)	388-390	Journal article
73	Singh, L.A.K. and Bustard, H.R.	1977	1970-79	Reptile	Crocodile	2	No	Yes	No	Yes	No	0	0	0	1	1	0	0	0	0	0	EcolBH	Locomotory behaviour during basking and spoor formation in the gharial (Gavialis gangeticus)	British Journal of Herpetology	5	673-676	Journal article
74	Thapliyal, J.P., Gupta, S.C. and Garg, R.K.	1975	1970-79	Reptile	Snakes	3	No	Yes	No	Yes	No	0	0	0	0	0	0	0	1	0	0	Dev	Metabolic effects of testosterone in the chequered water-snake, Natrix piscator	Journal of Endocrinology	65(3)	333-339	Journal article
75	Varma, S.K.	1970	1970-79	Reptile	Lizards	1	No	Yes	No	Yes	No	0	0	0	0	0	0	0	1	0	0	Dev	Morphology of ovarian changes in the garden lizard, Calotes versicolor	Journal of Morphology	131(2)	195-209	Journal article
76	Singh L., Sharma T. and Ray-Chaudhuri S.P.	1970	1970-79	Reptile	Snakes	3	No	Yes	No	Yes	No	0	0	0	0	0	0	0	1	0	0	Dev	Multiple sex-chromosomes in the common Indian Krait, Bungarus caeruleus Schneider	Chromosoma	31(4)	386-391	Journal article
77	Singh L.	1972	1970-79	Reptile	Snakes	1	No	Yes	No	Yes	No	0	0	0	0	0	0	0	1	0	0	Dev	MultipleW chromosome in a sea snake, Enhydrina schistosa daudin	Experientia	28(1)	95-97	Journal article
78	Kashyap, H.V.	1975	1970-79	Reptile	Snakes	1	No	Yes	No	Yes	No	0	0	0	0	0	0	0	0	1	0	Evol	Muscular architecture of the ophidian ventricle	Journal of Herpetology	9(1)	93-102	Journal article
79	Shukla, V.N.	1976	1970-79	Amphibian	Frogs	1	No	Yes	No	Yes	No	0	0	0	0	0	0	0	1	0	0	Dev	Musculature of the pelvic region ofUperodon systoma (Schn.)	Proceedings of the Indian Academy of Science B	83B	26-45	Journal article
80	Biswas, S. and Sanyal, D.P.	1977	1970-79	Reptile	Mixed	2	No	Yes	No	Yes	No	0	0	0	0	0	1	0	0	0	0	Div	Notes on the Reptilia collection from the Great Nicobar Island during the Great Nicobar Expedition in 1966	Records of the Zoological Survey of India	72	107-124	Journal article
81	Goel, S.C.	1973	1970-79	Reptile	Lizards	1	No	Yes	No	Yes	No	0	0	0	0	0	0	0	1	0	0	Dev	Observations on the development and hatching of the lizard, Calotes versicolor (Daudin)	Journal of Zoological Society of India	25	37-45	Journal article
82	Murthy, T.S.N.	1975	1970-79	Reptile	Snakes	1	No	Yes	No	Yes	No	0	0	0	0	0	1	0	0	0	0	Div	Occurrence of the Uropeltid Snake Brachyophidium rhodogaster Wall (Serpentes: Uropeltidae) from Tenmalai, Kerala, India	British Journal of Herpetology	5(4)	471	Journal article
83	Agrawal, H.P.	1970	1970-79	Reptile	Snakes	1	No	Yes	No	Yes	No	0	0	0	0	0	1	0	0	0	0	Div	On a collection of snakes from Jabalpur (Reptilia: Ophidia)	Journal of the Zoological Society of India	22(1-2)	41-46	Journal article
84	Pillai, R.S.	1977	1970-79	Amphibian	Frogs	1	No	Yes	No	Yes	No	0	0	1	0	0	0	0	0	0	0	TX	On two frogs of the family Microhylidae from Andamans including a new species	Proceedings of the Indian Academy of Science B	86 (2)	135-138	Journal article
85	Koul, O. and Duda, P.L.	1977	1970-79	Reptile	Lizards	2	No	Yes	No	Yes	No	0	0	0	0	0	0	0	1	0	0	Dev	Ovarian Cycle in High Altitude Lizards from Kashmir	Copeia	1977(4)	751-754	Journal article
86	Koul, O. and Duda, P.L.	1977	1970-79	Reptile	Lizards	2	No	Yes	No	Yes	No	0	0	0	0	0	0	0	1	0	0	Dev	Ovarian cycle in high altitude lizards from Kashmir. Part II. Scincella himalayanum (Boulenger)	Herpetologica	33(4)	427-433	Journal article
87	Prasad, M.R.N. and Reddy, P.R.K.	1972	1970-79	Reptile	Mixed	2	No	Yes	No	Yes	No	0	0	0	0	0	0	0	1	0	0	Dev	Physiology of the sexual segment of the kidney in reptiles	General and Comparative Endocrinology	3	649-662	Journal article
88	Whitaker R.	1973	1970-79	Reptile	Snakes	1	No	Yes	No	Yes	No	0	0	0	0	0	0	1	0	0	0	Con	Pit viper [Trimeresurus macrolepis (Beddome)] bites at a South Indian tea estate	Journal of the Bombay Natural History Society	70	207-208	Journal article
89	Sharma, R.C.	1976	1970-79	Reptile	Mixed	1	No	Yes	No	Yes	No	0	0	0	0	0	1	0	0	0	0	Div	Records of the reptiles of Goa	Records of the Zoological Survey of India	71	149-167	Journal article
90	Gans, C. and Baic, D.	1977	1970-79	Reptile	Snakes	2	No	Yes	No	Yes	No	0	0	0	0	0	0	0	0	1	0	Evol	Regional specialization of reptilian scale surfaces: relation of texture and biologic role	Science	195(4284)	1348-1350	Journal article
91	Mahajan, K.K. and Agrawal, H.P.	1976	1970-79	Reptile	Mixed	2	No	Yes	No	Yes	No	0	0	0	0	0	1	0	0	0	0	Div	Report on a collection of reptile fauna from Simla Hills, Himachal Pradesh	Records of the Zoological Survey of India	71	301-312	Journal article
92	Tiwari, K.K. and Sharma, R.C.	1970	1970-79	Reptile	Mixed	2	No	Yes	No	Yes	No	0	0	1	0	0	1	0	0	0	0	TXDiv	Reptiles of western Maharashtra	Journal of the Zoological Society of India	22	101-115	Journal article
93	Thapliyal, J.P. and A. Chandola	1973	1970-79	Reptile	Lizards	2	No	Yes	Yes	Yes	Yes	1	0.5	0	0	0	0	0	1	0	0	Dev	Seasonal variation in thyroid hormonogenesis in the Indian garden lizard, Calotes versicolor	Journal of Endocrinology	56(3)	451-462	Journal article
94	Murthy, T.S.N., Sharma, B.D. and Sharma, T.	1979	1970-79	Herpetofauna	Mixed	3	No	Yes	No	Yes	No	0	0	0	0	0	1	0	0	0	0	Div	Second report on the herpetofauna of Jammu and Kashmir, India	The Snake	11(2)	234-241	Journal article
95	Murthy, T.S.N.	1974	1970-79	Reptile	Snakes	1	No	Yes	No	Yes	No	0	0	0	0	0	0	0	1	0	0	Dev	Some earth-snakes (Serpentes: Uropeltidae) from Anaimalais and Palanis, Western Ghats, India	Journal of the University of Poona	UK	7-9	Journal article
96	Sharma R.C.	1976	1970-79	Reptile	Snakes	1	No	Yes	No	Yes	No	0	0	1	1	0	0	0	0	0	0	TXEcol	Some observations on ecology and systematics of Coluber bholanathi, a new species of snake (Reptilia: squamata: Colubridae) from India.	Comparative Physiology and Ecology	1(3)	105-107	Journal article
97	Panigrahy, G.K., Patnaik, B.K.	1974	1970-79	Reptile	Mixed	2	No	Yes	No	Yes	No	0	0	0	0	0	0	0	1	0	0	Dev	Studies on the connective tissue of reptiles—II. Age changes in collagen and water contents of tendon; in vitro ageing of bone collagen of the male garden lizard	Experimental gerontology	9	115-121	Journal article
98	Singh L.A.K. and Bustard, H.R.	1977	1970-79	Reptile	Crocodile	2	No	Yes	No	Yes	No	0	0	0	0	1	0	0	0	0	0	BH	Studies on the Indian Gharial Gavialis gangeticus (Gmelin) (Reptilia, Crocodilia) - V: Preliminary observations on maternal behaviour	Indian Forester	103(10)	671-678	Journal article
99	Kumar, S.	1974	1970-79	Amphibian	Caecilians	1	No	Yes	No	Yes	No	0	0	0	0	0	0	0	1	0	0	Dev	Studies on the structure and innervation of the heart of Apoda (Amphibia)	Acta Anatomica	90	550-562	Journal article
100	Gopalakrishnan, M. and Rajasekarasetty, M.R.	1978	1970-79	Amphibian	Frogs	2	No	Yes	No	Yes	No	0	0	0	0	1	0	0	0	0	0	BH	The annual reproductive behaviour of the green frog,Rana hexadactyla Lesson, in and around Mangalore and Mysore city (India)	Proceedings of the Indian Academy of Science B	87(6)	81-89	Journal article
101	Whitaker R.	1979	1970-79	Reptile	Crocodile	1	No	Yes	No	Yes	No	0	0	0	0	0	1	0	0	0	0	Div	The crocodilians of Corbett National Park	Indian Forester	2	38-40	Journal article
102	Whitaker R., Whitaker, Z. and Vaughan, A.	1979	1970-79	Reptile	Crocodile	3	No	Yes	No	Yes	Yes	1	0.33	0	1	0	0	0	0	0	0	Ecol	The Food of Captive Crocodilians.	Indian Forester	105(12)	886-887	Journal article
103	Daniel J.C. and Hussain, S.A.	1973	1970-79	Reptile	Crocodile	2	No	Yes	No	Yes	No	0	0	0	0	0	1	0	0	0	0	Div	The record (?) Saltwater Crocodile (Crocodylus porosus Schneider)	Journal of the Bombay Natural History Society	71(2)	309-312	Journal article
104	Nussbaum, R.A.	1979	1970-79	Amphibian	Caecilians	1	No	Yes	No	Yes	No	0	0	1	0	0	0	0	0	0	0	TX	The taxonomic status of the caecilian genus Uraeotyphlus Peters	Occasional Papers of the Museum of Zoology- University of Michigan	687	2020-01-20	Journal article
105	Pitchappan, R. and Muthukkaruppan, V.	1977	1970-79	Reptile	Lizards	2	No	Yes	No	Yes	No	0	0	0	0	0	0	0	1	0	0	Dev	Thymus‐dependent lymphoid regions in the spleen of the lizard, Calotes versicolor	Journal of Experimental Zoology	199(2)	177-187	Journal article
106	Chandola-Saklani, A., Kumar, D.S. and Thapiliyal, J.P.	1974	1970-79	Reptile	Lizards	3	Yes	No	Yes	Yes	Yes	1	0.33	0	0	0	0	0	1	0	0	Dev	Thyroid Activity and Oxidative Metabolism in a Species of Gecko (Hemidactylus Flaviviridis rüppell) in Relation to Sex Hormones	Journal of Endocrinology	63(1)	191-199	Journal article
107	Rao, M.V.S. and Rajabai, B.S.	1974	1970-79	Reptile	Lizards	2	No	Yes	No	Yes	No	0	0	0	0	0	0	0	1	0	0	Dev	Time course of laboratory acclimation in the ground lizard,Sitana ponticeriana and the garden lizard,Calotes nemoricola	Proceedings of the Indian Academy of Science B	79(2)	96-102	Journal article
108	Singh, K.S. and Thapliyal, J.P.	1973	1970-79	Reptile	Snakes	2	No	Yes	No	Yes	No	0	0	0	0	0	0	0	1	0	0	Dev	Twinning in the checkered water snake, Natrix piscator	Herpetologica	29(1)	19-20	Journal article
109	Sahi D.N. and Duda P.L.	1985	1980-89	Herpetofauna	Mixed	2	No	Yes	No	Yes	No	0	0	0	0	0	1	0	0	0	0	Div	A checklist of Amphibians and Reptiles of Jammu and Kashmir, India	Bulletin of Chicago Herpetology Society	20(3-4)	86-97	Journal article
110	Whitaker R. and Dattatri S.	1983	1980-89	Reptile	Snakes	2	No	Yes	No	Yes	No	0	0	1	0	0	0	0	0	0	0	TX	A new species of Oligodon from the Palni hills, South India (Serpentes: Colubridae)(with a plate)	Journal of the Bombay Natural History Society	79(3)	630-631	Journal article
111	Inger, R.F., Shaffer, H.B., Koshy, M. and Bakde, R.	1984	1980-89	Amphibian	Mixed	4	No	Yes	No	Yes	No	0	0	0	0	0	1	0	0	0	0	Div	A report on a collection of amphibians and reptiles from the Ponmudi, Kerala, South India	Journal of the Bombay Natural History Society	81 (2)	406-427	Journal article
112	Biswas, S. and Sanyal, D.P.	1980	1980-89	Reptile	Mixed	2	No	Yes	No	Yes	No	0	0	0	0	0	1	0	0	0	0	Div	A report on the Reptilia fauna of Andaman and Nicobar Islands in the collection of Zoological Survey of India	Records of the Zoological Survey of India	77	255-292	Journal article
113	Whitaker Z.	1985	1980-89	Reptile	Mixed	1	Yes	No	Yes	No	Yes	1	1	0	0	0	0	0	0	0	0	Con	A snake park as a conservation centre.	Oryx	19(1)	17-21	Journal article
114	Inger, R.F., Marx, H. and Koshy, M.	1984	1980-89	Reptile	Lizards	3	No	Yes	No	Yes	No	0	0	1	0	0	0	0	0	0	0	TX	An undescribed species of gekkonid lizard (Cnemaspis) from India with comments on the status of C. tropidogaster	Herpetologica	40(2)	149-154	Journal article
115	Bustard, H.R. and Kar, S.K.	1983	1980-89	Reptile	Crocodile	2	No	Yes	No	Yes	No	0	0	0	0	0	0	1	0	0	0	Con	Attacks on domestic livestock by juvenile saltwater crocodile, Crocodylus porosus, in Bhitarkanika Wildlife Sanctuary, Orissa India	Amphibia-Reptilia	4(1)	81-83	Journal article
116	Bustard, H.R. and Kar, S.K.	1981	1980-89	Reptile	Crocodile	2	No	Yes	No	Yes	No	0	0	0	0	0	0	1	0	0	0	Con	Attacks on domestic livestock by the Saltwater Crocodile (Crocodylus porosus) in Orissa, India	British Journal of Herpetology	6	135-136	Journal article
117	Kurian, T. and Saidapur, S.K.	1984	1980-89	Amphibian	Frogs	2	No	Yes	No	Yes	No	0	0	0	0	0	0	0	1	0	0	Dev	Changes in the Cytomorphology of Gonadotrophs during the Breeding Cycle of the Male Frog, Rana tigerina	Journal of Herpetology	18(4)	486-489	Journal article
118	Whitaker R. and Andrews, H.	1989	1980-89	Reptile	Crocodile	2	No	Yes	No	Yes	No	0	0	0	0	0	0	0	0	0	1	OT	Chemical Immobilization of the Mugger Crocodile (Crocodylus palustris) with Gallamine Triethiodide	Indian Forester	115(5)	355-356	Journal article
119	Mahapatra, M.S., Mahata, S.K. and Maiti, B.R.	1986	1980-89	Reptile	Chelonians	3	Yes	No	Yes	No	Yes	1	0.33	0	0	0	0	0	1	0	0	Dev	Circadian rhythms in serotonin, norepinephrine, and epinephrine contents of the pineal-paraphyseal complex of the soft-shelled turtle (Lissemys punctata punctata)	General and Comparative Endocrinology	64(2)	246-249	Journal article
120	Murthy, T.S.N.	1985	1980-89	Reptile	Chelonians	1	No	Yes	No	Yes	No	0	0	1	0	0	1	0	0	0	0	TXDiv	Classification and distribution of the reptiles of India	The Snake	17	48-71	Journal article
121	Auffenberg, W.	1981	1980-89	Reptile	Lizards	1	No	Yes	No	Yes	No	0	0	0	0	1	0	0	0	0	0	BH	Combat behaviour in Varanus bengalensis (Sauria: Varanidae)	Journal of the Bombay Natural History Society	78	54-72	Journal article
122	Bustard, H.R. and Choudhury, B.C.	1981	1980-89	Reptile	Crocodile	2	No	Yes	No	Yes	No	0	0	0	0	0	0	1	0	0	0	Con	Conservation future of the Saltwater Crocodile Crocodylus porosus Schneider in India	Journal of the Bombay Natural History Society	77	201-214	Journal article
123	De Vos, A.	1984	1980-89	Reptile	Crocodile	1	No	Yes	No	Yes	No	0	0	0	0	0	0	1	0	0	0	Con	Crocodile conservation in India	Biological Conservation	29(2)	183-189	Journal article
124	Bustard, H.R. and Kar, S.K.	1981	1980-89	Reptile	Crocodile	2	No	Yes	No	Yes	No	0	0	0	0	0	0	0	0	0	1	OT	Crocodile kills taken as human food	British Journal of Herpetology	6	137	Journal article
125	Bustard, H.R. and Kar, S.K.	1981	1980-89	Reptile	Crocodile	2	No	Yes	No	Yes	No	0	0	0	0	1	0	0	0	0	0	BH	Defence of the nest against man by the Saltwater Crocodile (Crocodylus porosus Schneider)	Journal of the Bombay Natural History Society	77(3)	514-515	Journal article
126	Agarwal, S.K. and Niazi, I.A.	1980	1980-89	Amphibian	Frogs	2	No	Yes	No	Yes	No	0	0	0	0	0	0	0	1	0	0	Dev	Development of mouthparts in the tadpoles of Rana tigrina Daud	Proceedings: Animal Sciences	89(2)	127-131	Journal article
127	Whitaker R. and Whitaker, Z.	1980	1980-89	Reptile	Lizards	2	No	Yes	Yes	Yes	Yes	1	0.5	0	0	0	1	1	0	0	0	DivCon	Distribution and status of Varanus salvator in India and Sri Lanka	Herpetological review	11(3)	81-82	Journal article
128	Koshy, M., Inger, R.F., Shaffer, H.B. and Bakde, R.	1987	1980-89	Herpetofauna	Mixed	4	No	Yes	No	Yes	No	0	0	0	1	0	0	0	0	0	0	Ecol	Ecological structure of a herpetological assemblage in South India	Amphibia-Reptilia	8(3)	189-202	Journal article
129	Shivakumar, G.R. and Sarkar, H.B.D.	1980	1980-89	Reptile	Lizards	2	No	Yes	No	Yes	No	0	0	0	0	0	0	0	1	0	0	Dev	Effect of cyproterone acetate on the testis and epididymis of the lizard,Psammophilus dorsalis (Gray)	Experimentia	36	616-618	Journal article
130	Mohanty-Hejmadi, P. and Dutta, S.K.	1981	1980-89	Amphibian	Frogs	2	Yes	No	Yes	Yes	Yes	1	0.5	0	1	0	0	0	0	0	0	Ecol	Effects of some pesticides on the development of the Indian bull frog Rana tigerina	Environmental Pollution Series A, Ecological and Biological	24(2)	145-161	Journal article
131	Vijaya, J.	1983	1980-89	Reptile	Chelonians	1	Yes	No	Yes	No	Yes	1	1	0	0	0	1	0	0	0	0	Div	First report of Amblyomma geoemydae from India	Hamadryad	8(1)	13	Journal article
132	Kurian, T. and Saidapur, S.K.	1983	1980-89	Amphibian	Frogs	2	No	Yes	No	Yes	No	0	0	0	0	0	0	0	1	0	0	Dev	Frequency distribution of cell numbers in the spermatocysts during the annual testicular cycle in the Indian frog Rana tigerina	Journal of Herpetology	17(4)	315-319	Journal article
133	Vijaya, J.	1983	1980-89	Reptile	Chelonians	1	Yes	No	Yes	No	Yes	1	1	0	0	0	1	0	0	0	0	Div	Freshwater turtle survey in India 1982–83	Hamadryad	8(1)	21-22	Journal article
134	Moll, E.O.	1984	1980-89	Reptile	Chelonians	1	No	Yes	No	Yes	No	0	0	0	0	0	1	1	0	0	0	DivCon	Freshwater turtles in India: Their status, conservation and management	Hamadryad	9(3)	9-17	Journal article
135	Murthy, T.S.N.	1987	1980-89	Herpetofauna	Mixed	1	No	Yes	No	Yes	No	0	0	0	0	0	1	0	0	0	0	Div	Herpetofauna of the Chilika Lagoon, Orissa, India	British Journal of Herpetology	21-22	8 - 12	Journal article
136	Mittal A.K. and Singh J.P.N.	1987	1980-89	Reptile	Snakes	2	No	Yes	No	Yes	No	0	0	0	0	0	0	0	1	0	0	Dev	Hinge epidermis of Natrix piscator during its sloughing cycle—structural organization and protein histochemistry	Journal of Zoology	213(4)	685-695	Journal article
137	Moll, E.O.	1984	1980-89	Reptile	Chelonians	1	No	Yes	No	Yes	No	0	0	0	0	0	1	1	0	0	0	DivCon	India's fresh water turtles in India their status, conservation and Management	Hamadryad	9	49-55	Journal article
138	Sharma, G.P. and Nakhasi, U.	1980	1980-89	Reptile	Snakes	2	No	Yes	NA	NA	Yes	1	0.5	0	0	0	0	0	1	0	0	Dev	Karyological Studies on Six Species of Indian Snakes (Colubridae: Reptilia)	Cytobios	27(107-108)	177-192	Journal article
139	Choudhury, B.C. and Chowdhury, S.	1986	1980-89	Reptile	Crocodile	2	No	Yes	No	Yes	No	0	0	0	0	0	0	1	0	0	0	Con	Lessons from Crocodile Reintroduction Projects in India	Indian Forester	112(10)	881-890	Journal article
140	Mohanty-Hejmadi, P., Dutta, S.K. and Khan, I.	1980	1980-89	Amphibian	Frogs	3	Yes	No	Yes	No	Yes	1	0.33	0	1	0	0	0	0	0	0	Ecol	Life history of the Indian frogs. III. The ornate frog, Microhyla ornata	Journal of the Zoological Society of India	32(1-2)	43-48	Journal article
141	Bustard, H.R. and Choudhury, B.C.	1980	1980-89	Reptile	Crocodile	2	No	Yes	No	Yes	No	0	0	0	1	0	0	0	0	0	0	Ecol	Long distance movement of a Saltwater Crocodile (Crocodylus porosus Schneider)	British Journal of Herpetology	6	87	Journal article
142	Saidapur, S.K. and Prasadmurthy, Y.S.	1987	1980-89	Amphibian	Frogs	2	No	Yes	No	Yes	No	0	0	0	0	0	0	0	1	0	0	Dev	Mechanisms regulating the ovarian cycle in the frog Rana cyanophlyctis: Effect of unilateral ovariectomy, season, feeding, human chorionic gonadotrophin, and …	Journal of Experimental Zoology	244 (2)	309-317	Journal article
143	Bustard, H.R. and Singh, L.A.K.	1983	1980-89	Reptile	Crocodile	2	No	Yes	No	Yes	No	0	0	0	1	0	0	0	0	0	0	Ecol	Movement of wild gharial, Gavialis gangeticus (Gmelin) in the river Mahanadi, Orissa (India)	British journal of herpetology	6(8)	287-291	Journal article
144	Špinar, Z.V. and Hodrová, M.	1985	1980-89	Amphibian	Frogs	2	No	Yes	Yes	Yes	Yes	1	0.5	0	0	0	0	0	0	0	1	OT	New knowledge of the genus Indobatrachus (Anura) from the Lower Eocene of India	Amphibia-Reptilia	6 (4)	363-376	Journal article
145	Sahi, D.N. and Duda, P.L.	1983	1980-89	Reptile	Lizards	2	No	Yes	No	Yes	No	0	0	0	1	0	0	0	0	0	0	Ecol	Notes on Little known lizards of Jammu and Kashmir state	Journal of the Bombay Natural History Society	80(1)	227-229	Journal article
146	Mansukhani, M.R. and Sarkar, A.K.	1981	1980-89	Amphibian	Frogs	2	Yes	No	Yes	Yes	Yes	1	0.5	0	0	0	1	0	0	0	0	Div	Notes on some Amphibian collections from Tripura, India	Record of Zoological Survey of India	79(2)	267-273	Journal article
147	Rao, R.J.	1986	1980-89	Reptile	Chelonians	1	No	Yes	No	Yes	No	0	0	0	1	0	0	0	0	0	0	Ecol	Notes on the sexual cycle of female Trionyx gangeticus in Central India	Journal of Herpetology	20(3)	455-457	Journal article
148	Biswas, S. and Acharjyo, L.N.	1984	1980-89	Reptile	Chelonians	2	No	Yes	No	Yes	No	0	0	0	1	0	0	0	0	0	0	Ecol	Notes on the study of three species of river turtles in Orissa	Bulletin of Zoological Survey of India	6	219-222	Journal article
149	Sahi, D.N. and Duda, P.L.	1986	1980-89	Reptile	Lizards	2	No	Yes	No	Yes	No	0	0	0	0	0	1	0	0	0	0	Div	Occurrence of Ablepharus pannonicus lizard (Lacertilia: Scincidae) in Jammu, an addition to Indian reptile fauna.	Bulletin of Chicago Herpetology Society	21(3-4)	92-93	Journal article
150	Mansukhani, M.R. and Sarkar A.K.	1980	1980-89	Amphibian	Frogs	2	Yes	No	Yes	Yes	Yes	1	0.5	1	0	0	0	0	0	0	0	TX	On a new species of toad (Anura: Bufonidae) from Camorta, Andaman and Nicobar, India	Bulletin of the Zoological Survey of India	3(1)	97-101	Journal article
151	Gupta R.C. and Sri Hari, P.	1989	1980-89	Reptile	Crocodile	2	No	Yes	No	Yes	No	0	0	0	0	1	0	0	0	0	0	BH	On thebasking behaviour of the muggerCrocodyluspalustrisat Bhorsainda Crocodile Sanctuary,Haryana, India	Journal of the Bombay Natural History Society	862	170-174	Journal article
152	Bustard, H.R. and Choudhury, B.C.	1980	1980-89	Reptile	Crocodile	2	No	Yes	No	Yes	No	0	0	0	0	1	0	0	0	0	0	BH	Parental care in saltwater crocodile, Crocodylus porosus, and management implications	Journal of the Bombay Natural History Society	77	64-69	Journal article
153	Kanamadi, R.D. and Saidapur, S.K.	1982	1980-89	Amphibian	Frogs	2	No	Yes	No	Yes	No	0	0	0	0	0	0	0	1	0	0	Dev	Pattern of ovarian activity in the Indian toad Bufo melanostictus (Schn)	Proceedings of the Indian National Science Academy B	48(3)	307-316	Journal article
154	Whitaker R. and Advani, R.	1983	1980-89	Reptile	Snakes	2	No	Yes	No	Yes	No	0	0	0	0	0	0	1	0	0	0	Con	Preliminary field study on snakes as agents of management of rodent populations	Indian Forester	109(6)	417-419	Journal article
155	Groombridge, B., Moll, E.O. and Vijaya, J.	1983	1980-89	Reptile	Chelonians	3	No	Yes	No	Yes	Yes	1	0.33	0	0	0	1	0	0	0	0	Div	Rediscovery of a rare Indian turtle	Oryx	17(3)	130-134	Journal article
156	Prasadmurthy, Y.S. and Saidapur, S.K.	1987	1980-89	Amphibian	Frogs	2	No	Yes	No	Yes	No	0	0	0	0	0	0	0	1	0	0	Dev	Role of fat bodies in oocyte growth and recruitment in the frog Rana cyanophlyctis (Schn.)	Journal of Experimental Zoology	243(1)	153-162	Journal article
157	Whitaker R.	1982	1980-89	Reptile	Crocodile	1	No	Yes	No	Yes	No	0	0	0	0	0	1	0	0	0	0	Div	Saltwater Crocodile in South India – first record for forty years	Hamadryad	UK	UK	Journal article
158	Mittal, A.K. and Singh, J.P.N.	1987	1980-89	Reptile	Snakes	2	No	Yes	No	Yes	No	0	0	0	0	0	0	0	1	0	0	Dev	Scale epidermis of Natrix piscator during its sloughing cycle‐structural organization and protein histochemistry (Reptilia: Colubridae)	Journal of Zoology	213(3)	545-568	Journal article
159	Lang, J.W., Andrews, H. and Whitaker, R.	1989	1980-89	Reptile	Crocodile	3	No	Yes	No	Yes	No	0	0	0	0	0	0	0	1	0	0	Dev	Sex Determination and Sex Ratios in Crocodylus palustris	American Zoologist	29(3)	935-952	Journal article
160	Kar, S.K. and Bustard, H.R.	1989	1980-89	Reptile	Crocodile	2	No	Yes	No	Yes	No	0	0	0	1	0	0	0	0	0	0	Ecol	Status of Saltwater Crocodile (Crocodylus porosus Schneider) in the Bhitarkanika Wildlife Sanctuary, Orissa, India.	Journal of the Bombay Natural History Society	8692)	141-150	Journal article
161	Pal, J.K., Nerurkar, A.R. and Goel, S.C.	1980	1980-89	Reptile	Lizards	3	No	Yes	No	Yes	No	0	0	0	0	0	0	0	1	0	0	Dev	Studies on the water soluble lens proteins of the lizard, Calotes versicolor. I. Fractionation and molecular weight determination	Experimental eye research	30(6)	739-746	Journal article
162	Pal, J.K., Nerurkar, A.R. and Goel, S.C.	1982	1980-89	Reptile	Lizards	3	No	Yes	No	Yes	No	0	0	0	0	0	0	0	1	0	0	Dev	Studies on the water‐soluble lens proteins of the lizard, Calotes versicolor . II. Electrophoretic and immunological characterization	Journal of Experimental Zoology	224(3)	299-306	Journal article
163	Pal, J.K. and Goel, S.C.	1986	1980-89	Reptile	Lizards	2	No	Yes	No	Yes	No	0	0	0	0	0	0	0	1	0	0	Dev	Studies on the Water‐Soluble Lens Proteins of the Lizard, Calotes versicolor III. Ontogenic Changes	Development, Growth & Differentiation	28(2)	157-167	Journal article
164	Auffenberg, W. and Ipe, I.M.	1983	1980-89	Reptile	Lizards	2	No	Yes	No	Yes	No	0	0	0	1	0	0	0	0	0	0	Ecol	The food and feeding of juvenile Bengal monitor lizards(Varanus bengalensis).	Journal of the Bombay Natural History Society	80(1)	119-124	Journal article
165	Whitaker, R. and Daniels, J.C.	1980	1980-89	Reptile	Crocodile	2	No	Yes	No	Yes	No	0	0	0	0	0	0	1	0	0	0	Con	The status of Indian crocodiles.	Journal of the Bombay Natural History Society	75	1238−1245	Journal article
166	Pai, A. and Basu, D.	1988	1980-89	Reptile	Chelonians	2	No	Yes	No	Yes	No	0	0	0	1	0	1	0	0	0	0	EcolDiv	Turtles of an ancient pilgrimage tank in north India with notes on the distribution of the peacock soft-shell turtle (Trionyx hurum)	Hamadryad	13	12-15	Journal article
167	Murthy, T.S.N.	1981	1980-89	Reptile	Chelonians	1	No	Yes	No	Yes	No	0	0	0	1	0	0	1	0	0	0	EcolCon	Turtles: Their natural history, economic importance and conservation	Zoologiana	4	57-65	Journal article
168	Rajagopalan, M.	1984	1980-89	Reptile	Chelonians	1	No	Yes	No	Yes	No	0	0	0	1	0	0	0	0	0	0	Ecol	Value of sea turtles to India	Central Marine Fisheries Research Institute Special Publication	18	49-58	Journal article
169	Saidapur, S.K., Kanamadi, R.D. and Bhuttewadkar, N.U.	1989	1980-89	Amphibian	Frogs	3	No	Yes	No	Yes	No	0	0	0	0	0	0	0	1	0	0	Dev	Variations in the fat body mass in the male frog, Rana cyanophlyctis	Journal of Herpetology	23(4)	461-463	Journal article
170	Verma, A.K., Sahi, D.N. and Gupta, V.K.	1999	1990-99	Reptile	Chelonians	3	No	Yes	No	Yes	No	0	0	0	1	0	0	0	0	0	0	Ecol	Observation on the nesting of Gangetic soft shelled turtle Aspideretes gangeticus Cuvier (Chelonia: Trionychidae) in lake Mansar in Indian Shivalik	Journal of Ecobiology	11(2)	137-143	Journal article
171	Prakash, S.	1998	1990-99	Amphibian	Mixed	1	No	Yes	No	Yes	No	0	0	0	0	0	1	0	0	0	0	Div	A chromosomal checklist of the amphibians of India	Hamadryad	22	111-113	Journal article
172	Murthy, T.S.N.	1992	1990-99	Reptile	Snakes	1	No	Yes	No	Yes	No	0	0	0	0	0	1	0	0	0	0	Div	A Distributional Analysis of the Uropeltid Snakes of India and Sri Lanka	Records of the Zoological Survey of India	91(3-4)	375-387	Journal article
173	Bhatta, G.	1998	1990-99	Amphibian	Caecilians	1	No	Yes	No	Yes	No	0	0	0	1	0	1	0	0	0	0	EcolDiv	A field guide to the caecilians of the Western Ghats, India.	Journal of Biosciences	23(1)	73-85	Journal article
174	Daniels, R.J.R.	1997	1990-99	Amphibian	Frogs	1	No	Yes	No	Yes	No	0	0	0	1	0	0	0	0	0	0	Ecol	A field guide to the frogs and toads of the Western Ghats, India Part I	Cobra	27	2020-01-25	Journal article
175	Ravichandran, M.S.	1997	1990-99	Amphibian	Frogs	1	No	Yes	No	Yes	No	0	0	1	0	0	0	0	0	0	0	TX	A new frog of the genus Nyctibatrachus (Anura: Ranidae) from southern India	Hamadryad	22	2020-09-12	Journal article
176	Chanda, S.K.	1990	1990-99	Amphibian	Frogs	1	No	Yes	No	Yes	No	0	0	1	0	0	0	0	0	0	0	TX	A new frog of the genus Rana (Ranidae: Anura) from Manipur, northeastern India	Hamadryad	15(1)	16-17	Journal article
177	Das, I.	1998	1990-99	Reptile	Snakes	1	No	Yes	No	Yes	No	0	0	1	0	0	0	0	0	0	0	TX	A new species of Boiga (Serpentes: Colubridae) from the Nicobar Archipelago	Journal of South Asian Natural History	3(1)	59-67	Journal article
178	Das, I.	1997	1990-99	Reptile	Lizards	1	No	Yes	No	Yes	No	0	0	1	0	0	0	0	0	0	0	TX	A new species of Cyrtodactylus from the Nicobar Islands, India	Journal of Herpetology	31(3)	375-382	Journal article
179	Das, I.	1991	1990-99	Reptile	Lizards	1	No	Yes	No	Yes	No	0	0	1	0	0	0	0	0	0	0	TX	A new species of Mabuya from Tamil Nadu state, southern India (Squamata: Scincidae)	Journal of Herpetology	25(3)	342-344	Journal article
180	Das, I., Chanda, S.K.	1998	1990-99	Amphibian	Frogs	2	No	Yes	No	Yes	No	0	0	1	0	0	0	0	0	0	0	TX	A new species of Philautus (Anura: Rhacophoridae) from the Eastern Ghats, south-eastern India	Journal of South Asian Natural History	3(1)	103-112	Journal article
181	Das, I., Ravichandran, M.S.	1998	1990-99	Amphibian	Frogs	2	No	Yes	No	Yes	No	0	0	1	0	0	0	0	0	0	0	TX	A new species of Polypedates (Anura: Rhacophoridae) from the Western Ghats, India, allied to the Sri Lankan P. cruciger Blyth, 1852	Hamadryad	22(2)	88-94	Journal article
182	Das, I., Ayyasami, K. and Yadagiri, P.	1998	1990-99	Reptile	Chelonians	3	No	Yes	No	Yes	No	0	0	1	0	0	0	0	0	0	0	TX	A New Species of Xinjiangchelyid (Testudines: Cryptodira: Xinjiangchelyidae) from the Cretaceous of Southern India	Russian Journal of Herpetology	5(2)	151-155	Journal article
183	Das, I.	1995	1990-99	Amphibian	Frogs	1	No	Yes	No	Yes	No	0	0	1	0	0	0	0	0	0	0	TX	A new tree frog (Genus: Polypedates) from Great Nicobar, India (Anura: Rhacophoridae)	Hamadryad	20	13-20	Journal article
184	Bhupathy, S.	1993	1990-99	Reptile	Snakes	1	No	Yes	No	Yes	No	0	0	0	1	0	0	0	0	0	0	Ecol	A note on the breeding of the Indian python Python molurus molurus in the wild	Cobra	13	2020-07-06	Journal article
185	Vyas, R.	1997	1990-99	Reptile	Lizards	1	No	Yes	No	Yes	No	0	0	0	1	0	0	0	0	0	0	Ecol	A note on the food habit of the house gecko H. flaviviridis	Cobra	30	16-18	Journal article
186	Das, I.	1998	1990-99	Reptile	Lizards	1	No	Yes	No	Yes	No	0	0	0	0	0	1	0	0	0	0	Div	A record of Gehyra mutilata (Wiegmann, 1835) from northern India (Sauria: Gekkonidae)	Hamadryad	22	118-119	Journal article
187	Malhotra, A. and Davis, K.	1991	1990-99	Herpetofauna	Mixed	2	Yes	No	Yes	No	Yes	2	1	0	0	0	1	0	0	0	0	Div	A report on a herpetological survey of the Srivilliputtur Reserve Forest, Tamil Nadu.	Journal of the Bombay Natural History Society	88(2)	157-166	Journal article
188	Pancharatna, K. and Saidapur, S.K.	1992	1990-99	Amphibian	Frogs	2	Yes	No	No	Yes	Yes	1	0.5	0	0	0	0	0	1	0	0	Dev	A study of ovarian foilicular kinetics, oviduct, fat body, and liver mass cycles in laboratory‐maintained Rana cyanophlyctis in comparison with wild‐caught frogs	Journal of Morphology	214(2)	123-129	Journal article
189	Gayen, N.C.	1999	1990-99	Reptile	Mixed	1	No	Yes	No	Yes	No	0	0	0	0	0	1	0	0	0	0	Div	A synopsis of the reptiles of Gujarat, western India	Hamadryad	24	1-22	Journal article
190	Radhakrishnan, C.	1998	1990-99	Reptile	Chelonians	1	No	Yes	No	Yes	No	0	0	0	0	0	1	0	0	0	0	Div	Additional record of the Travancore tortoise, Indotestudo forstenii (Schlegel & Muller)(Testudinidae: Reptilia) in Kerala	Cobra	34	19–20	Journal article
191	Thomas, J. and Easa, P.S.	1997	1990-99	Reptile	Mixed	2	No	Yes	No	Yes	No	0	0	0	0	0	1	0	0	0	0	Div	Additions to the reptile fauna of Silent Valley, Kerala	Cobra	27	31-33	Journal article
192	Jena, B.S., Das, S. and Patnaik, B.K.	1996	1990-99	Reptile	Lizards	3	No	Yes	No	Yes	No	0	0	0	0	0	0	0	1	0	0	Dev	Age related modifications of soluble proteins in various organs of male garden lizard, Calotes versicolor	Archives of Gerontology & Geriatics	22(1)	2020-10-01	Journal article
193	Ravichandran, M.S.	1996	1990-99	Amphibian	Mixed	1	No	Yes	No	Yes	No	0	0	0	0	0	1	0	0	0	0	Div	Amphibia of Kalakad Wildlife Sanctuary, Tamil Nadu, India	Cobra	23	15-31	Journal article
194	Naik, Y.M. and Vinod, K.R.	1992	1990-99	Amphibian	Mixed	2	No	Yes	No	Yes	No	0	0	0	0	0	1	0	0	0	0	Div	Amphibia of Shoolpaneshwar Sanctuary	Cobra	8	2020-07-10	Journal article
195	Andrew, M.I. and George, S.	1998	1990-99	Amphibian	Mixed	2	No	Yes	No	Yes	No	0	0	0	0	0	0	0	0	0	1	OT	Amphibian resources of Kerala	Cobra	33	41-48	Journal article
196	Daniels, R.J.R. and Kumar, M.V.R.	1998	1990-99	Amphibian	Mixed	2	No	Yes	No	Yes	No	0	0	0	0	0	1	0	0	0	0	Div	Amphibians and reptiles of Kolli Hills	Cobra	31	2020-03-05	Journal article
197	Deuti, K.	1996	1990-99	Amphibian	Mixed	1	No	Yes	No	Yes	No	0	0	0	0	0	1	0	0	0	0	Div	Amphibians of India: Some more species	Cobra	24	18-20	Journal article
198	Dutta, S.K.	1992	1990-99	Amphibian	Mixed	1	No	Yes	No	Yes	No	0	0	0	0	0	1	0	0	0	0	Div	Amphibians of India: updated species list with distribution record	Hamadryad	17	2020-01-13	Journal article
199	Radhakrishnan, C.	1996	1990-99	Amphibian	Mixed	1	No	Yes	No	Yes	No	0	0	0	0	0	1	0	0	0	0	Div	Amphibians of the Parambikulam Wildlife Sanctuary	Cobra	26	2020-10-17	Journal article
200	Daniels, R.J.R.	1999	1990-99	Amphibian	Mixed	1	No	Yes	No	Yes	No	0	0	0	0	0	0	1	0	0	0	Con	An action plan for amphibian research and conservation in India	Cobra	35	13-17	Journal article
201	Abraham, S., Easa, P.S., Thomas, J. and Nixon, M.A.	1999	1990-99	Reptile	Mixed	4	No	Yes	No	Yes	No	0	0	0	0	0	1	0	0	0	0	Div	An inventory of reptile fauna in Chinnar Wildlife Sanctuary, Idukki District, Kerala	Cobra	37	24-29	Journal article
202	Murthy, T.S.	1994	1990-99	Reptile	Mixed	1	No	Yes	No	Yes	No	0	0	0	0	0	1	0	0	0	0	Div	An updated handlist of the reptiles of India	Cobra	17	17	Journal article
203	Bhupathy, S. and Vijayan, V.S.	1993	1990-99	Reptile	Chelonians	2	No	Yes	No	Yes	No	0	0	0	1	0	0	0	0	0	0	Ecol	Aspects of the feeding ecology of Lissemys punctata (Reptilia: Trionychidae) in Keoladeo National Park, Bharatpur, India	Hamadryad	18	13–16	Journal article
204	Lillywhite, H.B., Mittal, A.K., Garg, T.K. and Das, I.	1998	1990-99	Amphibian	Frogs	4	No	Yes	No	Yes	No	0	0	0	1	1	0	0	0	0	0	EcolBH	Basking behavior, sweating and thermal ecology of the Indian tree frog, Polypedates maculatus	Journal of Herpetology	32(2)	169-175	Journal article
205	Das, I. and Whitaker, R.	1996	1990-99	Reptile	Snakes	2	No	Yes	No	Yes	No	0	0	0	0	0	0	0	0	0	1	OT	Bibliography of the king cobra (Ophiophagus hannah)	Smithsonian Herpetological Information Service	108	1-24	Journal article
206	Roy, D. and Elepfandt, A.	1993	1990-99	Amphibian	Frogs	2	Yes	No	No	Yes	Yes	1	0.5	0	1	0	0	0	0	0	0	Ecol	Bioacoustic analysis of frog calls from northeast India	Journal of Biosciences	18(3)	381-393	Journal article
207	Ravichandran, M.S.	1998	1990-99	Amphibian	Mixed	1	No	Yes	No	Yes	No	0	0	0	0	0	1	0	0	0	0	Div	Biodiversity of the Amphibian fauna of Tamil Nadu	Cobra	33	2020-10-14	Journal article
208	Daniels, R.J.R.	1996	1990-99	Amphibian	Mixed	1	No	Yes	No	Yes	No	0	0	1	0	0	0	0	0	1	0	TXEvol	Biogeography and Taxonomic uncertainties as illustrated by Indian Amphibians	Cobra	24	2020-02-06	Journal article
209	Das, I.	1999	1990-99	Herpetofauna	Mixed	1	No	Yes	No	Yes	No	0	0	0	0	0	0	0	0	1	0	Evol	Biogeography of the amphibians and reptiles of the Andaman and Nicobar Islands, India	Tropical Island Herpetofauna: Origin, Current Diversity and Conservation. Developments in animal and veterinary sciences	29	43-77	Journal article
210	Mohanty, A.K. and Dutta, S.K.	1999	1990-99	Amphibian	Frogs	2	No	Yes	No	Yes	No	0	0	0	1	0	0	0	0	0	0	Ecol	Biological Notes on Limnonectes limnocharis (Anura: Ranidae) in India	Russian Journal of Herpetology	6(1)	33-44	Journal article
211	Tiwara, M. and Schiavina, A.	1990	1990-99	Reptile	Lizards	2	Yes	No	Yes	Yes	Yes	1	0.5	0	1	0	0	0	0	0	0	Ecol	Biology of the Indian garden lizard, Calotes versicolor (Daudin). Part I: Morphometrics	Hamadryad	15(1)	30-33	Journal article
212	Vyas, R.	1996	1990-99	Reptile	Chelonians	1	No	Yes	No	Yes	No	0	0	0	1	0	0	0	0	0	0	Ecol	Breeding data on Lissemys punctata from western India	Hamadryad	21	45–47	Journal article
213	Kalaiarasan, V. and Rathinasabapathy, B.	1991	1990-99	Reptile	Snakes	2	No	Yes	No	Yes	No	0	0	0	1	0	0	0	0	0	0	Ecol	Breeding of the Indian python Python molurus	Cobra	3	2020-12-10	Journal article
214	Bhatta, G.	1997	1990-99	Amphibian	Caecilians	1	No	Yes	No	Yes	No	0	0	0	0	0	1	0	0	0	0	Div	Caecilian diversity of the Western Ghats: in search of the rare animals	Current science	73(2)	183-187	Journal article
215	Sagar, S.R. and Singh, L.A.K.	1993	1990-99	Reptile	Crocodile	2	No	Yes	No	Yes	No	0	0	0	1	0	0	1	0	0	0	EcolCon	Captive Breeding and Rehabilitation of Mugger Crocodile (Crocodylus palustris) in Similipal Tiger Reserve, Orissa, India	Indian Forester	119(10)	807-815	Journal article
216	Kumar, M.V.R. and Daniels, R.J.R.	1999	1990-99	Herpetofauna	Mixed	2	No	Yes	No	Yes	No	0	0	0	0	0	1	0	0	0	0	Div	Checklist of reptiles and amphibians of Kolli hills	Cobra	38	21–22	Journal article
217	Das, I. and Dutta, S.K.	1998	1990-99	Amphibian	Mixed	2	No	Yes	No	Yes	No	0	0	0	0	0	1	0	0	0	0	Div	Checklist of the amphibians of India, with English common names	Hamadryad	23	63-68	Journal article
218	Das, I.	1997	1990-99	Reptile	Mixed	1	No	Yes	No	Yes	No	0	0	0	0	0	1	0	0	0	0	Div	Checklist of the reptiles of India, with English common names	Hamadryad	22	32-45	Journal article
219	Kalaiarasan, V.	1999	1990-99	Reptile	Mixed	1	No	Yes	No	Yes	No	0	0	0	1	0	0	0	0	0	0	Ecol	Community structure of reptiles in scrub jungle forests in Chengai—MGR and Madras districts	Cobra	35	29-30	Journal article
220	Das, I.	1995	1990-99	Amphibian	Frogs	1	No	Yes	No	Yes	No	0	0	0	1	0	0	0	0	0	0	Ecol	Comparative morphology of the gastrointestinal tract in relation to diet in frogs from a locality in south India	Amphibia-Reptilia	16(3)	289-293	Journal article
221	Molur, S. and Walker, S.	1998	1990-99	Herpetofauna	Mixed	2	No	Yes	No	Yes	Yes	1	0.5	0	0	0	0	1	0	0	0	Con	Conservation assessment of the herpetofauna of India-an overview	Hamadryad	23	169–78	Journal article
222	Roy, D.	1994	1990-99	Amphibian	Frogs	1	Yes	No	Yes	No	Yes	1	1	0	0	0	0	0	1	0	0	Dev	Development of hearing in vertebrates with special reference to anuran acoustic communication	Journal of Bioscience	19(5)	629-644	Journal article
223	Kumar, V.V., Choudhury, B.C. and Soni, V.C.	1995	1990-99	Reptile	Crocodile	3	No	Yes	No	Yes	No	0	0	0	1	0	0	0	0	0	0	Ecol	Dietary habits of the mugger (Crocodylus palustris) in Andhra Pradesh, South India	Hamadryad	20	2020-12-08	Journal article
224	Dasgupta, R.	1990	1990-99	Amphibian	salamander	1	No	Yes	No	Yes	No	0	0	0	0	0	0	1	0	0	0	Con	Distribution and conservation problems of the Himalayan newt (Tylototriton verrucosus) in the Darjeeling Himalayas.	Hamadryad	15(1)	13-15	Journal article
225	Kalaiarasan, V. and Kanakasabai, R.	1999	1990-99	Reptile	Mixed	2	No	Yes	No	Yes	No	0	0	0	0	0	1	0	0	0	0	Div	Distribution and status of reptiles in Chennai, Kanchipuram and Tiruvellore districts, Tamil Nadu	Cobra	38	2020-05-01	Journal article
226	Bhupathy, S.	1995	1990-99	Reptile	Snakes	1	No	Yes	No	Yes	No	0	0	0	0	0	1	0	0	0	0	Div	Distribution of Python molurus bivittatus in India	Cobra	21	2-5	Journal article
227	Pandav, B. and Choudhury, B.C.	1996	1990-99	Reptile	Lizards	2	No	Yes	No	Yes	No	0	0	0	1	0	0	0	0	0	0	Ecol	Diurnal and seasonal activity patterns of water monitor (Varanus salvator) in the Bhitarkanika mangroves, Orissa, India	Hamadryad	21	2020-12-04	Journal article
228	Sahi, D.N., Abrol, B. and Verma, A.K.	1996	1990-99	Herpetofauna	Mixed	3	No	Yes	No	Yes	No	0	0	0	1	0	0	0	0	0	0	Ecol	Ecological notes on the herpetofauna of Ladakh region in J&K State (India)	Cobra	26	2020-09-01	Journal article
229	Daniels, R.J.R.	1991	1990-99	Reptile	Lizards	1	No	Yes	No	Yes	No	0	0	0	1	0	0	0	0	0	0	Ecol	Ecology and status of a little known lizard Otocryptis beddomii (Boulenger)	Cobra	5	2020-04-03	Journal article
230	Kuzmin, S.L., Dasgupta, R. and Smirina, É.M.	1994	1990-99	Amphibian	Salamander	3	No	Yes	Yes	Yes	Yes	1	0.33	0	1	0	0	0	0	0	0	Ecol	Ecology of the Himalayan newt (Tylototriton verrucosus) in Darjeeling Himalayas, India	Russian Journal of Herpetology	1(1)	69-76	Journal article
231	Kanamadi, R.D. and Saidapur, S.K.	1992	1990-99	Amphibian	Frogs	2	No	Yes	No	Yes	No	0	0	0	0	0	0	0	1	0	0	Dev	Effect of chronic exposure to the mercurial fungicide Emisan® on spermatogenesis in Rana cyanophlyctis	Journal of Herpetology	26(4)	508-510	Journal article
232	Saidapur, S.K. and Hoque, B.	1995	1990-99	Amphibian	Frogs	2	No	Yes	No	Yes	No	0	0	0	0	0	0	0	1	0	0	Dev	Effect of photoperiod and temperature on ovarian cycle of the frogRana tigrina (Daud.)	Journal of Biosciences	20(3)	445-452	Journal article
233	Kanamadi, R.D. and Saidapur, S.K.	1991	1990-99	Amphibian	Frogs	2	No	Yes	No	Yes	No	0	0	0	0	0	0	0	1	0	0	Dev	Effect of sublethal concentration of mercuric chloride on the ovary of the frog Rana cyanophlyctis	Journal of Herpetology	25(4)	494-497	Journal article
234	Kanamadi, R.D. and Saidapur, S.K.	1992	1990-99	Amphibian	Frogs	2	No	Yes	No	Yes	No	0	0	0	0	0	0	0	1	0	0	Dev	Effects of exposure to sublethal mercuric chloride on the testis and fat body of the frog Rana cyanophlyctis	Journal of Herpetology	26(4)	499-501	Journal article
235	Dutta, S.K. and Acharjyo, L.N.	1997	1990-99	Herpetofauna	Mixed	2	No	Yes	No	Yes	No	0	0	0	0	0	1	0	0	0	0	Div	Further additions to the herpetofauna of Orissa, India	Cobra	30	2020-08-01	Journal article
236	Daniels, R.J.R.	1995	1990-99	Amphibian	Mixed	1	No	Yes	No	Yes	No	0	0	0	1	0	0	0	0	0	0	Ecol	Habitat selection in Western Ghats. Amphibians-anura: Implications for species conservation	Cobra	20	2020-07-15	Journal article
237	Kannan, P., Sankaravadivelu, C. and Kalaiarasan, V.	1994	1990-99	Herpetofauna	Mixed	3	No	Yes	No	Yes	No	0	0	0	0	0	1	0	0	0	0	Div	Herpetofaunal assemblage in Mayiladuthurai Area: a conservational approach	Cobra	18	1-15	Journal article
238	Das, I. and Whitaker, R.	1990	1990-99	Herpetofauna	Mixed	2	No	Yes	No	Yes	No	0	0	0	0	0	1	0	0	0	0	Div	Herpetological investigations in the Western Ghats, South India. Part-I. The Vanjikadavu and Nadukani forests, Kerala state	Hamadryad	15(1)	6-9	Journal article
239	Das, I.	1994	1990-99	Herpetofauna	Mixed	1	No	Yes	No	Yes	No	0	0	0	0	0	0	0	0	0	1	OT	Herpetological philately	Bulletin of Chicago Herpetology Society	29	200-202	Journal article
240	Kalaiarasan, V., Rathinasabapathy, B., Tamilarasan, P., Aengals, R. and Ganesh P.A.J.	1991	1990-99	Herpetofauna	Mixed	5	No	Yes	No	Yes	No	0	0	0	0	0	1	0	0	0	0	Div	Herpetological survey of Narmada Valley, Madhya Pradesh. 1. Reptiles of Narmada Valley	Cobra	5	8-11, 17-18	Journal article
241	Pillai, R.S., Ravichandran, M.S. and Tamilarasan, P.	1991	1990-99	Herpetofauna	Mixed	3	No	Yes	No	Yes	No	0	0	0	0	0	1	0	0	0	0	Div	Herpetological survey of Narmada Valley, Madhya Pradesh. 2. Amphibians of Narmada Valley	Cobra	5	8-18	Journal article
242	Sarkar, A., Sarkar, N.K. and Maiti, B.R.	1995	1990-99	Reptile	Chelonians	3	Yes	No	Yes	No	Yes	1	0.33	0	0	0	0	0	1	0	0	Dev	Histological and functional changes of oviductal endometrium during seasonal reproductive cycle of the soft‐shelled turtle, Lissemys punctata punctata	Journal of Morphology	224(1)	1-14	Journal article
243	Das, I., Dattagupta, B. and Gayen, N.C.	1998	1990-99	Reptile	Mixed	3	No	Yes	No	Yes	No	0	0	1	0	0	0	0	0	0	0	TX	History and catalogue of reptile types in the collection of the Zoological Survey of India	Journal of South Asian Natural History	3(2)	121-172	Journal article
244	Young, B.A., Solomon, J. and Abishahin, G.	1999	1990-99	Reptile	Snakes	3	No	Yes	No	Yes	No	0	0	0	0	1	0	0	0	1	0	BHEvol	How many ways can a snake growl? The morphology of sound production in Ptyas mucosus and its potential mimicry of Ophiophagus.	Herpetological journal	9(3)	89-94	Journal article
245	Gokula, V.	1997	1990-99	Reptile	Snakes	1	No	Yes	No	Yes	No	0	0	0	0	0	0	1	0	0	0	Con	Impact of vehicular traffic on snakes in Mudumalai Wildlife Sanctuary	Cobra	27	26-30	Journal article
246	Das, I. and Pritchard, P.C.H.	1990	1990-99	Reptile	Chelonians	2	No	Yes	No	Yes	No	0	0	1	0	0	0	0	0	0	0	TX	Intergradation between Melanochelys trijuga trijuga and M. t. coronata (Testudines: Emydidae: Batagurinae)	Asiatic Herpetological Research	3	52-53	Journal article
247	Gupta, R.C. and Bhardwaj, C.S.	1995	1990-99	Reptile	Crocodile	2	No	Yes	No	Yes	No	0	0	0	1	0	0	0	0	0	0	Ecol	Investigation on the tunnel ecology of Crocodylus palustris Lesson.	Journal of Environmental Biology	16(2)	167-174	Journal article
248	Radhakrishnan, C.	1997	1990-99	Amphibian	Frogs	1	No	Yes	No	Yes	No	0	0	1	0	0	0	0	0	0	0	TX	Key to the identification of the species of Micrixalus Boulenger (Ranidae: Anura: Amphibia) from India	Cobra	28	31-33	Journal article
249	Das, I.	1996	1990-99	Amphibian	Frogs	1	No	Yes	No	Yes	No	0	0	1	0	0	0	0	0	0	0	TX	Limnonectes shompenorum, a new species of ranid frog of the Rana macrodon complex from Great Nicobar, India	Journal of South Asian Natural History	2	127-134	Journal article
250	Saidapur, S.K. and Hoque, B.	1996	1990-99	Amphibian	Frogs	2	No	Yes	No	Yes	No	0	0	0	0	0	0	0	1	0	0	Dev	Long-term effects of ovariectomy on abdominal fat body and body masses in the frog Rana tigrina during the recrudescent phase	Journal of Herpetology	30(1)	70-73	Journal article
251	Thomas, J., Easa, P.S. and Jahas, S.	1998	1990-99	Reptile	Lizards	3	No	Yes	No	Yes	No	0	0	0	0	0	1	0	0	0	0	Div	Mabuya allapallensis Schmidt a new record for Kerala	Cobra	31	16-18	Journal article
252	Sekar, M. and Rao, M.J.	1995	1990-99	Reptile	Snakes	2	No	Yes	No	Yes	No	0	0	0	0	0	0	1	0	0	0	Con	Management of Indian rock python (Python molurus) in captivity at Arignar Anna Zoological Park, Vandalur, Madras	Cobra	22	14-16	Journal article
253	Srivastav, A.K., Sasayama, Y. and Suzuki, N.	1995	1990-99	Reptile	Mixed	3	No	Yes	No	Yes	No	0	0	0	0	0	0	0	1	1	0	DevEvol	Morphology and physiological significance of parathyroid glands in reptilia	Microscopy research and technique	32(2)	91-103	Journal article
254	Das, I.	1991	1990-99	Reptile	Snakes	1	No	Yes	No	Yes	No	0	0	0	0	0	0	0	0	0	1	OT	Morphometrics of Eryx conicus (Schneider) at a locality in south India (Squamata: Boidae)	Hamadryad	16(1-2)	21-24	Journal article
255	Dani, C.S., Sagar, S.R. and Singh, L.A.K.	1991	1990-99	Reptile	Crocodile	3	No	Yes	No	Yes	No	0	0	0	1	0	0	0	0	0	0	Ecol	Mugger Crocodile Research at Ramatirtha : a Review	Indian Forester	117(10)	881-891	Journal article
256	Vasudevan, K.	1998	1990-99	Reptile	Crocodile	1	No	Yes	No	Yes	No	0	0	0	1	0	0	0	0	0	0	Ecol	Nesting ecology of Mugger (Crocodylus palustris) in Amaravathi, Southern India	Hamadryad	22(2)	107-110	Journal article
257	Bauer, A.M. and Das, I.	1999	1990-99	Herpetofauna	Mixed	2	No	Yes	No	Yes	No	0	0	1	0	0	0	0	0	0	0	TX	North Carolina Reptiles and Amphibians of Historical Note in the Collection of the Zoological Survey of India	Journal of the Elisha Mitchell Scientific Society	115(1)	2020-07-01	Journal article
258	Sanyal, D.P., Chandra P.K. and Ray, S.	1991	1990-99	Amphibian	Mixed	3	No	Yes	No	Yes	No	0	0	0	0	0	1	0	0	0	0	Div	Notes on Amphibian Collection from Bastar District, Madhya Pradesh, India	Records of the Zoological Survey of India	88(1)	45-48	Journal article
259	Vyas, R.	1990	1990-99	Reptile	Lizards	1	No	Yes	No	Yes	No	0	0	0	0	0	0	1	0	0	0	Con	Notes on capture of the spiny-tailed lizard (Uromastyx hardwickii) in Gujarat	Hamadryad	15(1)	28	Journal article
260	Andrews ,H. and Gaulke, M.	1990	1990-99	Reptile	Lizards	2	No	Yes	Yes	Yes	Yes	1	0.5	0	1	0	0	0	0	0	0	Ecol	Observations on the reproductive biology and growth of the water monitor (Varanus salvator) at the Madras Crocodile Bank	Hamadryad	15(1)	2020-05-01	Journal article
261	Venkatraman, C., Gokula, V. and Kumar, S.	1997	1990-99	Reptile	Snakes	3	No	Yes	No	Yes	No	0	0	0	0	0	1	0	0	0	0	Div	Occurrence of brown whip snake (Ahaetulla pulverulentus) in Siruvani foot hills	Cobra	28	36-37	Journal article
262	Kannan, P. and Bhupathy, S.	1997	1990-99	Reptile	Snakes	2	No	Yes	No	Yes	No	0	0	0	0	0	1	0	0	0	0	Div	Occurrence of the Elliot's Shieldtail snake (Uropeltis ellioti) in Anaikatty Hills, Nilgiri Biosphere Reserve	Cobra	28	34-35	Journal article
263	Sanyal, D.P. and Dasgupta, G.	1990	1990-99	Reptile	Mixed	2	No	Yes	Yes	Yes	Yes	1	0.5	0	0	0	1	0	0	0	0	Div	On a collection of reptiles from Bastar district, Madhya Pradesh, Central India	Hamadryad	15(1)	18-20	Journal article
264	Sahi, D.N. and Verma, A.K.	1996	1990-99	Reptile	Chelonians	2	No	Yes	No	Yes	No	0	0	0	1	0	1	0	0	0	0	EcolDiv	On the freshwater chelones fauna of Jammu and Kashmir. In: Koul BL (ed) Advances in fish and wildlife ecology and biology	Astral International (P) Ltd., New Delhi	1	309-315	Journal article
265	Sharath, B.K.	1990	1990-99	Reptile	Chelonians	1	No	Yes	No	Yes	No	0	0	0	0	0	1	0	0	0	0	Div	On the occurrence of the forest cane turtle (Geoemyda silvatica) in the Western Ghats of Karnataka, South India	Hamadryad	15	34	Journal article
266	Shanbhag, B.A., Subraya, L. and Saidapur, S.K.	1998	1990-99	Reptile	Lizards	3	Yes	No	No	Yes	Yes	1	0.333333	0	0	0	0	0	1	0	0	Dev	Pattern of recruitment, growth of developing follicles, and germinal bed activity in the tropical gecko, Hemidactylus brooki	Journal of Herpetology	32(4)	566-572	Journal article
267	Das, I. and Chanda, S.K.	1997	1990-99	Amphibian	Frogs	2	No	Yes	No	Yes	No	0	0	1	0	0	0	0	0	0	0	TX	Philautus sanctisilvaticus (Anura: Rhacophoridae), a new frog from the sacred groves of Amarkantak, central India	Hamadryad	22	21-27	Journal article
268	Sivasunder, A. and Devi Prasad, K.V.	1996	1990-99	Reptile	Chelonians	2	No	Yes	No	Yes	No	0	0	0	1	0	0	0	0	0	0	Ecol	Placement and predation of nest in leatherback sea turtles in the Andaman Islands, India	Hamadryad	21	36-42	Journal article
269	Abraham, C.	1990	1990-99	Reptile	Chelonians	1	No	Yes	No	Yes	No	0	0	0	1	0	0	0	0	0	0	Ecol	Preliminary observation on the nesting of the Olive ridley sea turtle (Lepidochelys olivacea) on the Madras coast, South India	Hamadryad	15	10-12	Journal article
270	Radder, R.S., Shanbhag, B.A. and Saidapur, S.K.	1998	1990-99	Reptile	Lizards	3	No	Yes	Yes	No	Yes	1	0.333333	0	0	0	0	0	1	0	0	Dev	Prolonged oviductal egg retention arrests embryonic growth at stage 34 in captive Calotes versicolor	Herpetological Review	29(4)	217	Journal article
271	Daniels, R.J.R. and Ishwar, N.M.	1994	1990-99	Herpetofauna	Mixed	2	No	Yes	No	Yes	No	0	0	0	0	0	1	0	0	0	0	Div	Rarity and the herpetofauna of the southern Eastern Ghats, India	Cobra	16	2-14	Journal article
272	Das, I. and Dattagupta, B.	1998	1990-99	Reptile	Lizards	2	No	Yes	No	Yes	No	0	0	1	0	0	0	0	0	0	0	TX	Rediscovery of the holotype of Leiurus berdmorei Blyth, 1853 (Sauria: Gekkonidae)	Journal of South Asian Natural History	3(1)	51-52	Journal article
273	Ota, H., Hikida, T. and Matsui , M.	1991	1990-99	Reptile	Lizards	3	No	Yes	No	Yes	No	0	0	1	0	0	0	0	0	0	0	TX	Re-evaluation of the status of Gecko verreauxi Tytler, 1864, from the Andaman Islands, India	Journal of Herpetology	25(2)	147-151	Journal article
274	Bhaskar, S.	1996	1990-99	Reptile	Chelonians	1	No	Yes	No	Yes	No	0	0	0	1	0	0	0	0	0	0	Ecol	Renesting intervals of the hawksbill turtle (Eretmochelys imbricata) on South Reef Island, Andaman Islands, India	Hamadryad	21	19-22	Journal article
275	Das, I.	1996	1990-99	Amphibian	Frogs	1	No	Yes	No	Yes	No	0	0	0	0	1	0	0	1	0	0	BHDev	Reproductive strategy and lipid mobilization in Rana hexadactyla at a seasonal locality	Ethology Ecology & Evolution	8 (2)	125-133	Journal article
276	Thomas, J. and Easa, P.S.	1997	1990-99	Reptile	Mixed	2	No	Yes	No	Yes	No	0	0	0	0	0	1	0	0	0	0	Div	Reptile Fauna of Peechi-Vazhani Wildlife Sanctuary	Cobra	29	14-18	Journal article
277	Kannan, P. and Venkatraman, C.	1998	1990-99	Reptile	Mixed	2	No	Yes	No	Yes	No	0	0	0	0	0	1	0	0	0	0	Div	Reptile fauna of Siruvani Hills, Nilgiri Biosphere Reserve, Tamil Nadu	Cobra	33	6-9	Journal article
278	Murthy, T.S.N.	1990	1990-99	Reptile	Mixed	1	No	Yes	No	Yes	No	0	0	0	0	0	1	0	0	0	0	Div	Reptiles of Kalakad Sanctuary, India	The Snake	22(1)	44-59	Journal article
279	Kumar, M.V.R.	1999	1990-99	Reptile	Mixed	1	No	Yes	No	Yes	No	0	0	0	0	0	1	0	0	0	0	Div	Reptiles of Kesarkulli Dam, Dharmapuri District	Cobra	38	2020-11-06	Journal article
280	Naik, Y.M., Vinod, K.R. and Pradeep, P.K.	1993	1990-99	Reptile	Mixed	3	No	Yes	No	Yes	No	0	0	0	0	0	1	0	0	0	0	Div	Reptiles of Narmada Valley, Gujarat	Cobra	11	2020-08-07	Journal article
281	Sharma, S.K.	1999	1990-99	Herpetofauna	Mixed	1	No	Yes	No	Yes	No	0	0	0	0	0	1	0	0	0	0	Div	Reptilian and amphibian fauna of Sajjangarh wildlife sanctuary, Udaipur Rajasthan	Cobra	38	14-15	Journal article
282	Aengals, R.	1995	1990-99	Reptile	Mixed	1	No	Yes	No	Yes	No	0	0	0	0	0	1	0	0	0	0	Div	Reptilian fauna in the plantations of Valparai, Western Ghats, Tamil Nadu	Cobra	5	7	Journal article
283	Das, I.	1996	1990-99	Amphibian	Mixed	1	No	Yes	No	Yes	No	0	0	0	1	0	0	0	0	0	0	Ecol	Resource use and foraging tactics in a south Indian amphibian community	Journal of South Asian Natural History	2 (1)	2020-01-30	Journal article
284	Sekhar, K.C. and Bustard, H.R.	1990	1990-99	Reptile	Crocodile	2	No	Yes	No	Yes	No	0	0	0	1	0	0	0	0	0	0	Ecol	Results of a pilot Saltwater Crocodile, Crocodylus porosus Schneider restocking in Bhuitarkanika Wildlife Sanctuary, Orissa	Journal of the Bombay Natural History Society	87(2)	195-200	Journal article
285	Rao, R.J.	1991	1990-99	Reptile	Crocodile	1	No	Yes	No	Yes	No	0	0	0	0	0	1	0	0	0	0	Div	Saltwater Crocodile Crocodylus porosus in Andhra Pradesh	Journal of the Bombay Natural History Society	88(1)	116-117	Journal article
286	Bhaskar, S.	1996	1990-99	Reptile	Snakes	1	No	Yes	No	Yes	No	0	0	0	1	0	0	0	0	0	0	Ecol	Sea kraits on South Reef Island, Andaman Islands, India	Hamadryad	21	27-35	Journal article
287	Kalairasan, V. and Kanakasasbai, R.	1994	1990-99	Reptile	Snakes	2	No	Yes	No	Yes	No	0	0	0	1	0	0	0	0	0	0	Ecol	Seasonal availability of Sea snakes (Family: Hydrophiidae) in the Madras waters	Cobra	16	18-19	Journal article
288	Sarkar, S., Maiti, B.R. and Sarkar, N.K.	1996	1990-99	Reptile	Chelonians	3	Yes	No	Yes	No	Yes	1	0.33	0	0	0	0	0	1	0	0	Dev	Seasonal Pattern in ovarian growth and interrelated changes in plasma steroid levels, vitellogenesis, and oviductal function in the adult female soft-shelled turtle Lissemys punctata punctata	Canadian Journal of Zoology	74(2)	303-311	Journal article
289	Vyas, R. and Patel, B.H.	1994	1990-99	Amphibian	Frogs	2	No	Yes	No	Yes	No	0	0	0	0	0	1	0	0	0	0	Div	Second record of the frog Kaloula pulchra Gray from Gujarat State	Cobra	18	25-26	Journal article
290	Duda, P.L., Verma, A.K. and Sahi, D.N.	1993	1990-99	Reptile	Chelonians	3	No	Yes	No	Yes	No	0	0	0	1	0	0	0	0	0	0	Ecol	Sex ratios in freshwater turtles from Jammu, India	Hamadryad	18	2020-12-10	Journal article
291	Captain, A. and Patel, A.	1998	1990-99	Reptile	Snakes	2	No	Yes	Yes	Yes	Yes	1	0.5	0	0	0	1	0	0	0	0	Div	Sinonatrix, a new genus for India	Hamadryad	22	114-115	Journal article
292	Urfi, A.J., Jethwa, K. and Nareshwar, E.K.	1999	1990-99	Herpetofauna	Mixed	3	No	Yes	No	Yes	No	0	0	0	0	0	0	1	0	0	0	Con	Some recent herpetological initiatives of Sundarvan Nature Discovery Centre, Ahmedabad	Cobra	37	17-23	Journal article
293	Srinivas, S.R., Hegde, S.N., Sarkar, H.B.D. and Shivanandappa, T.	1995	1990-99	Reptile	Lizards	4	No	Yes	No	Yes	No	0	0	0	1	0	0	0	0	0	0	Ecol	Sperm storage in the oviduct of the tropical rock lizard,Psammophilus dorsalis	Journal of Morphology	224(3)	293-301	Journal article
294	Thomas, J., Sabu, J. and Easa, P.S.	1997	1990-99	Reptile	Mixed	3	No	Yes	No	Yes	No	0	0	0	0	0	1	0	0	0	0	Div	Status and distribution of reptiles in Wayanad, Kerala	Cobra	28	25-30	Journal article
295	Daniels, R.J.R.	1999	1990-99	Amphibian	Mixed	1	No	Yes	No	Yes	No	0	0	0	0	0	1	0	0	0	0	Div	Status of amphibian diversity in India	Cobra	36	25-28	Journal article
296	Rao, R.J.	1998	1990-99	Reptile	Mixed	1	No	Yes	No	Yes	No	0	0	0	0	0	0	1	0	0	0	Con	Status of crocodiles and freshwater turtles in the Chambel River and Ganga River: a comparative analysis	Cobra	33	31-34	Journal article
297	Banugopan, K. and Davidar, P.	1999	1990-99	Reptile	Chelonians	2	No	Yes	No	Yes	Yes	1	0.5	0	0	0	1	0	0	0	0	Div	Status of sea turtles along the Pondicherry coast, India	Hamadryad	24	43-43	Journal article
298	Verma, A.K. and Sahi, D.N.	1998	1990-99	Reptile	Chelonians	2	No	Yes	No	Yes	No	0	0	0	1	0	1	0	0	0	0	EcolDiv	Status, range extension and ecological notes on Indo-Gangetic Flapshell Turtle Lissemys punctata Anderson (Testudines: Trionychidae) in Jammu Shivaliks	Cobra	34	2020-09-06	Journal article
299	Aengals, R.	1999	1990-99	Reptile	Snakes	1	No	Yes	No	Yes	No	0	0	0	1	0	0	0	0	0	0	Ecol	Studies on the ecology of common arboreal and land snakes in scrub jungle forests of Chengalpattu-MGR district, Tamilnadu	Cobra	35-36	18-24	Journal article
300	Ahmed, S. and Dasgupta, G.	1991	1990-99	Reptile	Mixed	2	No	Yes	Yes	Yes	Yes	1	0.5	0	0	0	1	0	0	0	0	Div	Studies on the lizard and snakes of North Bihar	Records of the Zoological Survey of India	88(1)	75-80	Journal article
301	Shetty, S. and Devi Prasad, K.V.	1996	1990-99	Reptile	Snakes	2	No	Yes	No	Yes	No	0	0	0	1	1	0	0	0	0	0	EcolBH	Studies on the terrestrial behaviour of Laticauda colubrina in the Andaman Islands, India	Hamadryad	21	23-26	Journal article
302	Sharma, S.K.	1998	1990-99	Reptile	Mixed	1	No	Yes	No	Yes	No	0	0	0	0	0	1	0	0	0	0	Div	Survey of reptilian fauna of Jamwa Ramgarh Wildlife Sanctuary, Rajasthan	Cobra	34	10-11	Journal article
303	Radhakrishnan, C.	1996	1990-99	Reptile	Mixed	1	No	Yes	No	Yes	No	0	0	0	0	0	1	0	0	0	0	Div	Survey of Reptilian fauna of Parambikulam Wildlife Sanctuary, Kerala	Cobra	24	2020-12-07	Journal article
304	Sarkar, A.K.	1991	1990-99	Amphibian	Mixed	1	No	Yes	No	Yes	No	0	0	0	0	0	1	0	0	0	0	Div	The amphibians of Chota Nagpur (Bihar), India.	Records of the Zoological Survey of India	89(1-4)	209-217	Journal article
305	Wüster, W.	1998	1990-99	Reptile	Snakes	1	No	Yes	No	Yes	No	0	0	1	0	0	0	0	0	0	0	TX	The cobras of the genus Naja in India	Hamadryad	23	15-32	Journal article
306	Krishnan, H.	1992	1990-99	Reptile	Lizards	1	No	Yes	No	Yes	No	0	0	0	1	0	0	0	0	0	0	Ecol	The common monitor	Cobra	8	2020-06-03	Journal article
307	Naik, Y.M. and Vinod, K.R.	1993	1990-99	Amphibian	Mixed	2	No	Yes	No	Yes	No	0	0	0	0	0	1	0	0	0	0	Div	The Distribution of Amphibians in Gujarat State, India	Hamadryad	18	28-34	Journal article
308	Das, I.	1999	1990-99	Reptile	Mixed	1	No	Yes	No	Yes	No	0	0	0	0	0	0	0	0	0	1	OT	The Fauna of India and Adjacent Countries Reptilia Volume I (Testudines and Crocodilia)	Herpetological Review	30(1)	61	Journal article
309	Wüster, W.	1998	1990-99	Reptile	Snakes	1	No	Yes	No	Yes	No	0	0	1	0	0	0	0	0	0	0	TX	The genus Daboia (Serpentes: Viperidae): Russell's viper	Hamadryad	23(1)	33-40	Journal article
310	Daniels, R.J.R. and David, P.V.	1996	1990-99	Herpetofauna	Mixed	2	No	Yes	No	Yes	No	0	0	0	0	0	1	0	0	0	0	Div	The herpetofauna of Great Nicobar Island	Cobra	25	2020-04-01	Journal article
311	Deuti, K.	1996	1990-99	Amphibian	Salamander	1	No	Yes	No	Yes	No	0	0	0	1	0	0	0	0	0	0	Ecol	The Himalayan Salamander	Cobra	23	35-37	Journal article
312	Das, I.	1994	1990-99	Amphibian	Frogs	1	No	Yes	No	Yes	No	0	0	0	0	0	0	0	1	0	0	Dev	The internal oral morphology of some anuran larvae from south India: a scanning electron microscopic study	Amphibia-Reptilia	15(3)	249-256	Journal article
313	Pandav, B., Choudhury, B.C. and Shanker, K.	1998	1990-99	Reptile	Chelonians	3	No	Yes	No	Yes	No	0	0	0	0	0	0	1	0	0	0	Con	The Olive Ridley sea turtle (Lepidochelys olivacea) in Orissa: an urgent call for an intensive and integrated conservation programme	Current Science	75(12)	1323-1328	Journal article
314	Daltry, J.	1991	1990-99	Reptile	Lizards	1	Yes	No	Yes	No	Yes	1	1	0	0	1	0	0	0	0	0	BH	The social hierarchy of the water monitor, Varanus salvator	Hamadryad	16	10-20	Journal article
315	Das, I.	1991	1990-99	Reptile	Chelonians	1	No	Yes	No	Yes	No	0	0	1	0	0	0	0	0	0	0	TX	The taxonomic status of the Pleistocene turtle Geoclemys sivalensis	Journal of Herpetology	25(1)	104-107	Journal article
316	Patyal, H.C.	1995	1990-99	Reptile	Chelonians	1	No	Yes	No	Yes	No	0	0	0	0	0	0	0	0	0	1	OT	Tortoise in mythology and ritual	East and West	45(1-4)	97-107	Journal article
317	Dey, S., Hooroo R.N.K., Begum, A. and Goswami, U.C.	1998	1990-99	Amphibian	Frogs	4	No	Yes	No	Yes	Yes	2	0.5	0	0	0	0	0	1	0	0	Dev	Unique ultra-structural features of photoreceptor cells and their functional significance in the retina of the frog, Rana limnocharis (Wiegmann)	Current Science	74(6)	502-504	Journal article
318	Mirza, Z.A. and Pal, S.	2008	2000-09	Herpetofauna	Mixed	2	No	Yes	No	Yes	No	0	0	0	0	0	1	0	0	0	0	Div	A checklist of Reptiles and amphibians of Sanjay Gandji National Park, Mumbai, Maharashtra	Cobra	2(4)	14	Journal article
319	Das, A., Saikia, U., Murthy, B., Dey, S. and Dutta, S.K.	2009	2000-09	Herpetofauna	Mixed	5	No	Yes	No	Yes	No	0	0	0	0	0	1	0	0	0	0	Div	A herpetofaunal inventory of Barail Wildlife Sanctuary and adjacent regions, Assam, north-eastern India	Hamadryad	34(1)	117-134	Journal article
320	Mukherjee, D. and Bhupathy, S.	2007	2000-09	Reptile	Snakes	2	No	Yes	No	Yes	No	0	0	1	0	0	0	0	0	0	0	TX	A New Species of Wolf Snake (Serpentes: Colubridae: Lycodon) from Anaikatti Hills, Western Ghats, Tamil Nadu, India	Russian Journal of Herpetology	14(1)	21-26	Journal article
321	Saxena, M.M.	2003	2000-09	Reptile	Chelonians	1	No	Yes	No	Yes	No	0	0	0	0	1	0	0	0	0	0	BH	A note on conditioning in starred tortoise Geochelone elegans (Schoepff) for yellow coloured food	Cobra	54	23	Journal article
322	Whitaker, R.	2003	2000-09	Reptile	Mixed	1	No	Yes	No	Yes	No	0	0	0	0	0	0	0	0	0	1	OT	A photographic guide to the snakes and other reptiles of India by Das, I.	Hamadryad	27	289-289	Journal article
323	Boundy, J.	2008	2000-09	Reptile	Snakes	1	No	Yes	No	Yes	No	0	0	1	0	0	0	0	0	0	0	TX	A possible third specimen of the pitviper genus Tropidolaemus from India	Hamadryad	32(1)	59-62	Journal article
324	Pasha, M.K.S., Areendran, G., Sankar, K. and Qureshi, Q.	2000	2000-09	Reptile	Snakes	4	No	Yes	No	Yes	No	0	0	0	0	0	0	0	0	0	0		A preliminary checklist of snakes of Pench Tiger Reserve, Madhya Pradesh	Cobra	40	2020-08-05	Journal article
325	Ganesh, S.R., Asokan, J.R. and Kannan, P.	2008	2000-09	Herpetofauna	Mixed	3	No	Yes	No	Yes	No	0	0	0	0	0	1	0	0	0	0	Div	A preliminary survey of amphibians and reptiles in Cardamom Hills, Western Ghats, Tamil Nadu	Cobra	2(2)	1-9	Journal article
326	Gayen Nemai, N.C.	2001	2000-09	Reptile	Snakes	1	No	Yes	No	Yes	No	0	0	0	0	0	0	0	0	0	0		A record of Amphiesma venningi (Wall, 1910)(Serpentes: Colubridae) from Meghalaya State, India	Hamadryad	26	375-375	Journal article
327	Tripathy, B. and Choudhury, B.C.	2007	2000-09	Reptile	Chelonians	2	No	Yes	No	Yes	No	0	0	0	0	0	0	1	0	0	0	Con	A review of sea turtle exploitation with special reference to Orissa, Andhra Pradesh and Lakshadweep Islands, India	Indian Journal of Traditional Knowledge (IJTK)	6(2)	285-291	Journal article
328	Vyas, R.	2000	2000-09	Reptile	Mixed	1	No	Yes	No	Yes	No	0	0	0	0	0	0	1	0	0	0	Con	A review of threats and conservation of the reptiles of Gir forest, Gujarat, India	Cobra	39	16-20	Journal article
329	David, P., Vogel, G., Vijayakumar, S.P. and Vidal, N.	2006	2000-09	Reptile	Snakes	4	No	Yes	No	Yes	No	0	0	1	0	0	0	0	0	0	0	TX	A revision of the Trimeresurus puniceus-complex (Serpentes: Viperidae: Crotalinae) based on morphological and molecular data	Zootaxa	1293(1)	1-78	Journal article
330	Ganesh, S.R. and Chandramouli, S.R.	2007	2000-09	Herpetofauna	Mixed	2	No	Yes	No	Yes	No	0	0	0	0	0	1	0	0	0	0	Div	A study of the Herpetofaunal community of Mannampandal, Nagapatinam dist. Tamil Nadu	Cobra	1(4)	33-43	Journal article
331	Ganesh, S.R., Chandramouli, S.R. and Edward, S.L.	2007	2000-09	Herpetofauna	Mixed	3	No	Yes	No	Yes	No	0	0	0	1	0	0	0	0	0	0	Ecol	A Study on Herpetofaunal Assemblages in the Rain Forests of Western Ghats	Scientific Transactions in Environment and Technovation	1(2)	95-103	Journal article
332	Mirza Z.A. and Patil, S.	2009	2000-09	Herpetofauna	Mixed	2	No	Yes	No	Yes	No	0	0	0	0	0	1	0	0	0	0	Div	A Survey report of the reptiles & amphibians of Powai Lake, Aarey Milk Colony and Film City, Mumbai, Maharashtra	Cobra	3(1)	11-20	Journal article
333	Das, I. and Gayen, N.C.	2004	2000-09	Reptile	Mixed	2	No	Yes	No	Yes	No	0	0	1	0	0	0	0	0	0	0	TX	Addenda and corrigenda to the catalogue of reptile types in the collection of the Zoological Survey of India	Hamadryad	28	95-97	Journal article
334	Mathew, R.	2007	2000-09	Reptile	Snakes	1	Yes	No	Yes	No	Yes	1	1	0	0	0	1	0	0	0	0	Div	Additions to the snake fauna of Mizoram	Cobra	1(1)	5-9	Journal article
335	Daniels, R.J.R.	2001	2000-09	Herpetofauna	Mixed	1	No	Yes	No	Yes	No	0	0	0	0	0	1	0	0	0	0	Div	Amphibians and reptiles of Tamil Nadu Eastern and Western Ghats	Cobra	43	2020-08-01	Journal article
336	Pawar, S.S. and Choudhury, B.C.	2000	2000-09	Reptile	Chelonians	2	No	Yes	No	Yes	No	0	0	0	0	0	1	1	0	0	0	DivCon	An inventory of chelonians from Mizoram, north-east India: new records and some observations on threats	Hamadryad	25	144-158	Journal article
337	Tripathy, B. and Pandav, B.	2008	2000-09	Reptile	Chelonians	2	No	Yes	No	Yes	No	0	0	0	1	0	0	0	0	0	0	Ecol	Beach fidelity and internesting movements of olive ridley turtles (Lepidochelys olivacea) at Rushikulya, India	Herpetological Conservation and Biology	3(1)	40-45	Journal article
338	Whitaker, N. and Vijaya, J.	2009	2000-09	Reptile	Chelonians	2	No	Yes	No	Yes	Yes	1	0.5	0	1	0	0	0	0	0	0	Ecol	Biology of the forest cane turtle, Vijayachelys silvatica, in South India	Chelonian Conservation and Biology	8 (2)	109-115	Journal article
339	Chettri, B. and Bhupathy, S.	2007	2000-09	Reptile	Mixed	2	Yes	No	No	Yes	Yes	1	0.5	0	0	0	1	0	0	0	0	Div	Checklist of reptiles reported from Sikkim and Darjeeling Hills	Journal of Hill Research	20(1)	2020-06-01	Journal article
340	Murthy, T.S.N. and Aengals, R.	2008	2000-09	Reptile	Mixed	2	No	Yes	No	Yes	No	0	0	0	0	0	1	0	0	0	0	Div	Checklist of the reptiles of the Eastern Ghats, India	Cobra	2(1)	7-12	Journal article
341	Vyas, R.	2000	2000-09	Reptile	Mixed	1	No	Yes	No	Yes	No	0	0	0	0	0	1	0	0	0	0	Div	Comments on a synopsis of the reptiles of Gujarat, India'	Hamadryad	25	203-207	Journal article
342	Pawar, S., Koo, M.S., Kelley, C., Ahmed, M.F., Chaudhuri, S. and Sarkar, S.	2007	2000-09	Herpetofauna	Mixed	6	No	Yes	No	Yes	Yes	1	0.16	0	0	0	0	1	0	0	0	Con	Conservation assessment and prioritization of area in Northeast India: Priorities for amphibians and reptiles	Biological Conservation	136(3)	346-361	Journal article
343	Gower, D.J. and Ablett, J.D.	2006	2000-09	Reptile	Snakes	2	No	Yes	No	Yes	No	0	0	1	0	0	0	0	0	0	0	TX	Counting ventral scales in Asian anilioid snakes	The Herpetological Journal	16(3)	259-263	Journal article
344	Ishwar, N.M., Chellam, R. and Kumar, A.	2001	2000-09	Reptile	Mixed	3	No	Yes	No	Yes	No	0	0	0	1	0	0	0	0	0	0	Ecol	Distribution of forest floor reptiles in the rainforest of Kalakad–Mundanthurai Tiger Reserve, South India	Current Science	80(3)	413-418	Journal article
345	Sharma, S.K.	2000	2000-09	Reptile	Mixed	1	No	Yes	No	Yes	No	0	0	0	1	0	0	0	0	0	0	Ecol	Drought and reptiles: an experience in Rajasthan	Cobra	40	2020-10-09	Journal article
346	Chauhan, R.	2000	2000-09	Reptile	Chelonians	1	No	Yes	No	Yes	No	0	0	0	0	0	0	0	0	0	1	OT	Dry plastral skin: a new resource from softshelled turtles	Cobra	39	25-26	Journal article
347	Gaur, S. and Pandey, V.K.	2007	2000-09	Herpetofauna	Mixed	2	Yes	No	Yes	Yes	Yes	1	0.5	0	1	0	0	0	0	0	0	Ecol	Ecological notes on the herpetological fauna of Kumbhalgarh Wildlife Sanctuary, Rajasthan, India	Cobra	1(3)	2020-07-04	Journal article
348	Ingle, M.	2002	2000-09	Reptile	Snakes	1	No	Yes	No	Yes	No	0	0	0	1	0	1	0	0	0	0	EcolDiv	Ecology and status of the ophiofauna of eight districts of Malwa region of Madhya Pradesh	Cobra	50	1-17	Journal article
349	Noon, B.R., Ishwar, N.M. and Vasudevan, K.	2006	2000-09	Herpetofauna	Mixed	3	No	Yes	No	Yes	No	0	0	0	1	0	0	0	0	0	0	Ecol	Efficiency of adaptive cluster and random sampling in detecting terrestrial herpetofauna in a tropical rainforest	Wildlife Society Bulletin	34(1)	59-68	Journal article
350	Ghodke, S. and Andrews, H.V.	2001	2000-09	Reptile	Snakes	2	No	Yes	No	Yes	No	0	0	0	0	0	1	0	0	0	0	Div	Enhydris plumbea (Boie, 1827)(Serpentes: Colubridae: Homalopsinae), a new record for India	Hamadryad	26(2)	373-375	Journal article
351	Gopi, G.V., Pandav, B. and Choudhury, B.C.	2007	2000-09	Reptile	Chelonians	3	No	Yes	No	Yes	No	0	0	0	0	0	0	1	0	0	0	Con	Estimated annual incidental captures of Lepidochelys olivacea (Eschscholtz, 1829) in trawl nets along the Orissa coast, India	Hamadryad	31 (2)	212-215	Journal article
352	Radhakrishnan, C., Gopi, K.C. and Palot, M.J.	2007	2000-09	Herpetofauna	Mixed	3	No	Yes	No	Yes	No	0	0	0	0	0	1	0	0	0	0	Div	Extension of range of distribution of Nasikabatrachus sahyadrensis Biju & Bossuyt (Amphibia: Anura: Nasikabatrachidae) along Western Ghats, with some insights into its bionomics	Current Science	92(2)	213-216	Journal article
353	Ingle, M.	2009	2000-09	Reptile	Snakes	1	No	Yes	No	Yes	No	0	0	0	0	0	1	0	0	0	0	Div	First locality record of Stout Sand Snake, Psammophis longifrons Boulenger, 1896 from Ujjain District, Madhya Pradesh	Cobra	3(2)	12-13	Journal article
354	Captain, A., Bhatt, B.B.	2001	2000-09	Reptile	Snakes	2	No	Yes	No	Yes	No	0	0	0	0	0	1	0	0	0	0	Div	First record of Amphiesma venningi (Wall, 1910)(Serpentes, Colubridae, Natricinae) from India, with remarks on its subspecies	Hamadryad	26(2)	354-358	Journal article
355	Bhide, K., Captain, A. and Khandal, D.	2004	2000-09	Reptile	Snakes	3	No	Yes	No	Yes	No	0	0	0	0	0	1	0	0	0	0	Div	First record of Lytorhynchus paradoxus (Gunther, 1875)(Scrpentes: Colubridac) from the Republic of India, with notes on its distribution	Hamadryad	28	123-127	Journal article
356	Ahmed, M.F. and Das, A.	2006	2000-09	Reptile	Snakes	2	No	Yes	No	Yes	No	0	0	0	0	0	1	0	0	0	0	Div	First record of Rhabdophis nuchalis (Boulenger)(Serpentes: Colubridae) from India with notes on its Distribution and natural history	Hamadryad	30(1-2)	120-126	Journal article
357	Sharma, S.K.	2004	2000-09	Reptile	Mixed	1	No	Yes	No	Yes	No	0	0	0	1	0	0	0	0	0	0	Ecol	Forest fires and slow-moving reptiles	Cobra	55	18	Journal article
358	Tripathy, B., Pandav, B. and Panigrahy, R.C.	2003	2000-09	Reptile	Chelonians	3	No	Yes	No	Yes	No	0	0	0	1	0	0	0	0	0	0	Ecol	Hatching success and orientation in Lepidochelys olivacea (Eschscholtz, 1829) at Rushikulya rookery, Orissa, India	Hamadryad	27(2)	185-192	Journal article
359	Bhalodia, K., Bhuva, V.J., Dave, S.M. and Soni, V.C.	2001	2000-09	Herpetofauna	Mixed	4	No	Yes	No	Yes	No	0	0	0	0	0	1	0	0	0	0	Div	Herpetofauna of Barda Wildlife Sanctuary, Gujarat	Cobra	47	8-17	Journal article
360	Palot, M.J. and Radhakrishnan, C.	2002	2000-09	Herpetofauna	Mixed	2	No	Yes	No	Yes	No	0	0	0	0	0	1	0	0	0	0	Div	Herpetofauna of Madayipara hill, Kannur district, Kerala	Cobra	48	3 - 4	Journal article
361	Bhalodia, K., Dave, S.M. and Soni, V.C.	2001	2000-09	Herpetofauna	Mixed	3	No	Yes	No	Yes	No	0	0	0	0	0	1	0	0	0	0	Div	Herpetofauna of Rampara Wildlife Sanctuary, Gujarat	Cobra	45	5-10	Journal article
362	Vijayakumar, S.P., Ragavendran, A. and Choudhury, B.C.	2006	2000-09	Herpetofauna	Mixed	3	No	Yes	No	Yes	No	0	0	0	1	0	0	0	0	0	0	Ecol	Herpetofaunal assemblage in a tropical dry forest mosaic of Western Ghats, India: Preliminary analysis of species composition and abundance during the dry …	Hamadryad	30	1-2	Journal article
363	Gajbe, P.	2003	2000-09	Herpetofauna	Mixed	1	No	Yes	No	Yes	No	0	0	0	0	0	1	0	0	0	0	Div	Herpetofaunal diversity of Dindori district Madhya Pradesh	Cobra	54	2020-08-06	Journal article
364	Vijayakumar, S.P., Vasudevan, K. and Ishwar, N.M.	2001	2000-09	Herpetofauna	Mixed	3	No	Yes	No	Yes	No	0	0	0	1	0	0	0	0	0	0	Ecol	Herpetofaunal mortality on roads in the Anamalai Hills, southern Western Ghats	Hamadryad	26(2)	265-272	Journal article
365	Ganesh, S.R. and Chandramouli, S.R.	2006	2000-09	Herpetofauna	Mixed	2	No	Yes	No	Yes	No	0	0	0	0	0	1	0	0	0	0	Div	Herpetofaunal survey at Agumbe	Cobra	64	7-11	Journal article
366	Das, I.	2003	2000-09	Herpetofauna	Mixed	1	No	Yes	No	Yes	No	0	0	0	0	0	0	0	0	0	1	OT	Herpetology of an Antique Land: The History of Herpetological Explorations and Knowledge in India and South Asia	Bonner Zoologische Beitrage	52(3-4)	215-229	Journal article
367	Pasha, M.K.S., Dutta, R. and Sinha, S.	2009	2000-09	Reptile	Chelonians	3	No	Yes	No	Yes	No	0	0	0	0	0	0	1	0	0	0	Con	Illegal trade of fresh water turtles and tortoises in India	ENVIS Bulletin: Wildlife and Protected Areas	12(1)	177	Journal article
368	Whitaker, N.	2006	2000-09	Reptile	Chelonians	1	No	Yes	No	Yes	No	0	0	0	0	0	0	0	1	0	0	Dev	Immaculate conception, incubation protocols, and egg characteristics of the Ganges softshell turtle (Aspideretes gangeticus)	Contemporary Herpetology	2006(1)	1-6	Journal article
369	Upadhyay, S. and Upadhyay, V.	2002	2000-09	Reptile	Chelonians	2	No	Yes	No	Yes	No	0	0	0	0	0	0	1	0	0	0	Con	International and national instruments and marine turtle conservation in India	Journal of International Wildlife Law & Policy	5(1-2)	65-86	Journal article
370	Sharma, S.K.	2003	2000-09	Reptile	Chelonians	1	No	Yes	No	Yes	No	0	0	0	0	0	0	1	0	0	0	Con	Is a wrong rescue practice of Testudian animals responsible for dwindling of their numbers in Rajasthan	Cobra	52	1314	Journal article
371	Srivastava, R. and Patnaik, R.	2002	2000-09	Reptile	Chelonians	2	No	Yes	No	Yes	No	0	0	1	0	0	0	0	0	0	0	TX	Large soft-shelled turtles from the Upper Pliocene rocks of Saketi (district, Sirmaur), Himachal Pradesh, India	Journal of the Palaeontological Society of India	47	65-76	Journal article
372	Andrews, H.V., Krishnan, S. and Biswas, P.	2002	2000-09	Reptile	Chelonians	3	No	Yes	No	Yes	No	0	0	0	1	1	0	0	0	0	0	EcolBH	Leatherback nesting in the Andaman & Nicobar Islands	Kachhapa	6	15-17	Journal article
373	Radder, R.S.	2007	2000-09	Reptile	Mixed	1	No	Yes	No	Yes	No	0	0	0	0	0	0	0	1	1	0	DevEvol	Maternally derived egg yolk steroid hormones and sex determination: Review of a paradox in reptiles	Journal of Biosciences	32(2)	1213-1220	Journal article
374	Das, I.	2009	2000-09	Reptile	Chelonians	1	No	Yes	No	Yes	No	0	0	0	1	0	1	0	0	0	0	EcolDiv	Melanochelys tricarinata	Chelonian Research Monographs	5	25	Journal article
375	Das, I. and Bhupathy, S.	2009	2000-09	Reptile	Chelonians	2	No	Yes	No	Yes	No	0	0	0	1	0	1	0	0	0	0	EcolDiv	Melanochelys trijuga (Schweigger 1812) Indian Black Turtle	Chelonian Research Monographs	38	UK	Journal article
376	Chettri, B., Bhupathy, S. and Acharya, B.K.	2009	2000-09	Reptile	Snakes	3	Yes	No	No	Yes	Yes	1	0.33	0	1	0	0	0	0	0	0	Ecol	Morphometry and aspects of breeding biology of Trachischium guentheri boulenger, 1890 (serpentes: colubridae) in north Sikkim, eastern Himalaya, India	Russian Journal of Herpetology	16(3)	177-182	Journal article
377	Kannan, P.	2007	2000-09	Reptile	Mixed	1	No	Yes	No	Yes	No	0	0	0	0	0	0	1	0	0	0	Con	Mortality of Reptiles due to vehicular traffic in Mudumalai wildlife sanctuary, Western Ghats, Tamil Nadu, India	Cobra	1(3)	1-3	Journal article
378	Vyas, R. and Patel, S.S.	2007	2000-09	Reptile	Snakes	2	No	Yes	No	Yes	No	0	0	0	0	0	1	0	0	0	0	Div	New distributional records of the endemic snake Coronella brachyura (Günther 1866)(Serpentes, Colubridae, Colubrinae) from Gujarat State, India	Sauria	29(3)	47-50	Journal article
379	Guptha, M.B., Thulasaih, T. and Prasad, N.V.S.	2007	2000-09	Reptile	Snakes	3	No	Yes	No	Yes	No	0	0	0	0	0	1	0	0	0	0	Div	New locality record of yellow collared wolf snake Lycodon flavicollis Mukherjee and Bhupathy, 2007 from Seshachalam Biosphere reserve, Eastern Ghats, Andhra Pradesh, India	Journal of Research in Biology	4(3)	1328-1331	Journal article
380	Chandra, K. and Gajbe, P.	2003	2000-09	Reptile	Snakes	2	No	Yes	No	Yes	No	0	0	0	0	0	1	0	0	0	0	Div	New record of ocellate shield tail Uropeltis ocellata (Beddome),(Uropeltidae) from Pachmarchi Biosphere Reserve, Madhya Pradesh	Cobra	52	15-16	Journal article
381	Mirza, Z.A. and Ahmed, J.J.	2009	2000-09	Reptile	Snakes	2	No	Yes	No	Yes	No	0	0	0	1	0	0	0	0	0	0	Ecol	Note on predation of Calliophis melanurus Shaw, 1802 (Serpents: Elapidae) by Scolopendra sp	Sauria	34(1)	166	Journal article
382	Pal, S. and Mirza Z.A.	2009	2000-09	Reptile	Snakes	2	No	Yes	No	Yes	No	0	0	0	0	0	1	0	0	0	0	Div	Notes on the distribution and natural history of the rare and endemic, Stout Sand Snake, Psammophis longifrons Boulenger, 1896	Cobra	3(3)	7	Journal article
383	Tillack, F., Husain, A. and Husain, H.J.	2008	2000-09	Reptile	Snakes	3	No	Yes	No	Yes	No	0	0	0	0	0	1	0	0	0	0	Div	Notes on the distribution of Boiga forsteni (Duméril, Bibron et Duméril, 1854) in India, with a new record from the Chhatarpur District, Madhya Pradesh	Sauria	30(1)	49-50	Journal article
384	Tillack, F., Shah, K.B., Gumprecht, A. and Husain, A.	2003	2000-09	Reptile	Snakes	4	No	Yes	No	Yes	No	0	0	0	1	0	0	0	0	0	0	Ecol	Notes on the Distribution, Morphology, Biology, Husbandry and Breeding of the Mountain Pitviper, Ovophis monticola monticola (GÜNTHER, 1864) (Serpentes: Viperidae: Crotalinae)	Sauria	25(4)	29-46	Journal article
385	Tripathy, B.	2006	2000-09	Reptile	Snakes	1	No	Yes	No	Yes	No	0	0	0	0	0	0	0	0	0	0		Observations on Hook-nosed Sea snake, Enhydrina schistosa (Daudin) and Black and Yellow Sea Snake, Pelamis platurus (Linnaeus) at Rishikulya, Orissa	Cobra	63	2020-06-04	Journal article
386	Chettri, B. and Bhupathy, S.	2009	2000-09	Reptile	Snakes	2	No	Yes	No	Yes	No	0	0	0	0	0	1	0	0	0	0	Div	Occurrence of Dinodon gammiei (Blanford, 1878) in Sikkim, Eastern Himalaya, India	Journal of Threatened Taxa	1(1)	60-61	Journal article
387	Thakur, S. and Watve, A.	2009	2000-09	Reptile	Snakes	2	No	Yes	Yes	Yes	Yes	1	0.5	0	0	0	1	0	0	0	0	Div	Occurrence of Enhydris sieboldii (Schlegel, 1837) in Bhopal, Madhya Pradesh State of India	Russian Journal of Herpetology	16(2)	159-160	Journal article
388	Vyas, R. and Upadhyay, K.	2008	2000-09	Reptile	Snakes	2	No	Yes	No	Yes	No	0	0	0	0	0	1	0	0	0	0	Div	On the occurrence of Lycodon flavomaculatus Wall, 1907 in Gujarat State, India	Sauria	30	55-58	Journal article
389	David, P. Captain, A. and Bhatt, B.B.	2001	2000-09	Reptile	Snakes	3	No	Yes	No	Yes	No	0	0	1	0	0	1	0	0	0	0	TXDiv	On the occurrence of Trimeresurus medoensis Djao in Djao & Jiang, 1977 (Serpentes, Viperidae, Crotalinae) in India, with a redescription of this species and notes on its biology.	Hamadryad	26(2)	210-226	Journal article
390	Gower, D.J., Captain, A. and Thakur, S.S.	2008	2000-09	Reptile	Snakes	3	No	Yes	No	Yes	No	0	0	1	0	0	0	0	0	0	0	TX	On the taxonomic status of Uropeltis bicatenata (Günther)(Reptilia: Serpentes: Uropeltidae)	Hamadryad	33	64-82	Journal article
391	Sarkar, S., Sarkar, N.K. and Maiti, B.R.	2003	2000-09	Reptile	Chelonians	3	Yes	No	Yes	No	Yes	1	0.33	0	0	0	0	0	1	0	0	Dev	Oviductal sperm storage structure and their changes during the seasonal (dissociated) reproductive cycle in the soft‐shelled turtle Lissemys punctata punctata	Journal of Experimental Zoology Part A: Comparative Experimental Biology	295(1)	83-91	Journal article
392	Iverson, J.B., Spinks, P.Q., Shaffer, H.B., McCord, W.P. and Das, I.	2001	2000-09	Reptile	Chelonians	5	No	Yes	No	Yes	No	0	0	0	0	0	0	0	0	1	0	Evol	Phylogenetic relationships among the Asian tortoises of the genus Indotestudo (Reptilia: Testudines: Testudinidae)	Hamadryad	26(2)	272-275	Journal article
393	Sharma, S.K.	2000	2000-09	Herpetofauna	Mixed	1	No	Yes	No	Yes	No	0	0	0	0	0	1	0	0	0	0	Div	Preliminary report on the herpetofauna of Nahargarh wildlife sanctuary, Jaipur district	Cobra	41	2020-07-02	Journal article
394	Ramesh, M.	2008	2000-09	Reptile	Chelonians	1	Yes	No	Yes	No	Yes	1	1	0	0	0	1	0	0	0	0	Div	Preliminary survey of Indotestudo travancorica (Testudinidae) at the Indira Gandhi Wildlife Sanctuary, southern India	Hamadryad	33	118-120	Journal article
395	Sharma, S.K., Rathor, F.S., Chavda, K. and Patel , S.	2001	2000-09	Reptile	Mixed	4	No	Yes	No	Yes	No	0	0	0	0	0	1	1	0	0	0	DivCon	Preliminary survey of the reptilian fauna of Mount Abu Wildlife Sanctuary and snake conservation efforts in Mount Abu Town	Cobra	44	2020-10-05	Journal article
396	Sharma, S.K.	2003	2000-09	Reptile	Snakes	1	No	Yes	No	Yes	No	0	0	0	0	0	1	0	0	0	0	Div	Presence of Dumeril's Black-headed Snake (Sibynophis subpunctatus) in Kumbhalgarh Wildlife Sanctuary, Rajasthan, India	Cobra	53	17-18	Journal article
397	Sharma, S.K.	2009	2000-09	Reptile	Snakes	1	No	Yes	No	Yes	No	0	0	0	0	0	1	0	0	0	0	Div	Presence of montane trinket snake Coelognathus helena monticollaris in Phulwari Ki Nal Wildlife Sanctuary, Udaipur District, Rajasthan, India	Cobra	3(4)	19-20	Journal article
398	Krishnakumar, K., Raghavan, R. and Pereira, B.	2009	2000-09	Reptile	Chelonians	3	No	Yes	No	Yes	No	0	0	0	0	0	0	1	0	0	0	Con	Protected on Paper, Hunted in Wetlands: Exploitation and Trade of Freshwater Turtles (Melanochelys Trijuga Coronata and Lissemys Punctata Punctata) in Punnamada, Kerala, Indiaia	Tropical Conservation Science	2(3)	363-373	Journal article
399	Ghodke, S. and Andrews, H.V.	2001	2000-09	Reptile	Snakes	2	No	Yes	No	Yes	No	0	0	0	0	0	1	0	0	0	0	Div	Recent record of Cantoria violacea (Girard, 1857) from the North and Middle Andaman Islands, India, with a note on its bite	Hamadryad	26(2)	371-373	Journal article
400	Ganesh, S.R., Asokan, S. and Kannan, P.	2008	2000-09	Reptile	Snakes	3	No	Yes	No	Yes	No	0	0	0	1	0	0	0	0	0	0	Ecol	Record Length of Large Scaled Pit Viper (Trimeresurus macrolepis) Beddome 1862, with Notes on its Ecological and Conservational Significance	Cobra	2(3)	17-22	Journal article
401	Rufus, K.C.	2009	2000-09	Reptile	Chelonians	1	No	Yes	No	Yes	No	0	0	0	0	0	1	0	0	0	0	Div	Record of albino Indian flapshell turtle (Lissemys punctata) from Adyar Wetland, South India	Cobra	3(2)	10-11	Journal article
402	Mathew, R.	2005	2000-09	Reptile	Snakes	1	Yes	No	Yes	No	Yes	1	1	0	0	0	1	0	0	0	0	Div	Record of Mandarin Trinket Snake (Euprepiophis mandarinus)(Cantor) and Assam Snail Eater (Pareas monticola)(Cantor)(Colubridae: Serpentes) from Nagaland, India	Cobra	62	23-24	Journal article
403	Ganesh, S.R., Asokan, S. and Kannan, P.	2009	2000-09	Reptile	Snakes	3	No	Yes	No	Yes	No	0	0	0	0	0	1	0	0	0	0	Div	Record of Oligodon travancoricus Beddome, 1877 (Serpentes, Colubridae) from Grizzled Squirrel Sanctuary, Western Ghats, Tamil Nadu, India	Herpetological Bulletin	109	25-28	Journal article
404	Kannan, P.	2006	2000-09	Reptile	Snakes	1	No	Yes	No	Yes	No	0	0	0	0	0	1	0	0	0	0	Div	Record of ornate flying snake Chrysopelea ornata (Shaw) in Mudumalai Wildlife sanctuary, Southern India	Cobra	63	13	Journal article
405	Sharma, K.K. and V. Sharma	2009	2000-09	Reptile	Snakes	2	No	Yes	No	Yes	No	0	0	0	0	0	1	0	0	0	0	Div	Records of new locality of royal snake species in central semiarid region of Rajasthan (Ophidia: Colubridae; Colubrinae; Spalerosophis diadema atriceps)	Cobra	3(3)	16-18	Journal article
406	Ramesh, M.	2008	2000-09	Reptile	Chelonians	1	Yes	No	Yes	No	Yes	1	1	0	1	0	0	0	0	0	0	Ecol	Relative abundance and morphometrics of the Travancore tortoise, Indotestudo travancorica, in the Indira Gandhi Wildlife Sanctuary, southern Western Ghats, India	Chelonian Conservation and Biology	7(1)	108-113	Journal article
407	Shanbhag, B.A.	2002	2000-09	Reptile	Mixed	1	Yes	No	Yes	No	Yes	1	1	0	1	0	0	0	0	0	0	Ecol	Reproductive biology of Indian reptiles	Proceedings of the Indian Academy of Science B	68(6)	497-528	Journal article
408	Daniels, R.J.R.	2001	2000-09	Herpetofauna	Mixed	1	No	Yes	No	Yes	No	0	0	0	0	0	1	0	0	0	0	Div	Reptiles and amphibians of Kar nataka	Cobra	42	2020-11-01	Journal article
409	Kalaiarasan, V.	2003	2000-09	Reptile	Mixed	1	No	Yes	No	Yes	No	0	0	0	0	0	1	0	0	0	0	Div	Reptiles of Mudumalai Wildlife Sanctuary, Tamil Nadu	Cobra	54	20-22	Journal article
410	Chandra, K. and Pandey, V.K.	2005	2000-09	Reptile	Mixed	2	No	Yes	No	Yes	No	0	0	0	0	0	1	0	0	0	0	Div	Reptilia of Achanakmar Wildlife Sanctuary, Chhattisgarh	Cobra	60	1-5	Journal article
411	Ganesh, S.R., Chandramouli, S.R. and Edward, S.L.	2005	2000-09	Reptile	Mixed	3	No	Yes	No	Yes	No	0	0	0	0	0	1	0	0	0	0	Div	Reptiliain Fauna in and around Korattur Lake, Chennai	Cobra	60	2020-12-06	Journal article
412	Bhatnagar, C. and Mathur, M.	2008	2000-09	Reptile	Mixed	2	Yes	No	Yes	No	Yes	2	1	0	0	0	1	0	0	0	0	Div	Reptilian fauna of Baghdarrah Nature Park, Udaipur Wildlife Division, Udaipur, Rajasthan, India	Cobra	2(2)	17-20	Journal article
413	Harit, D.N. and Ramanujam, S.N.	2002	2000-09	Reptile	Mixed	2	No	Yes	No	Yes	No	0	0	0	0	0	1	0	0	0	0	Div	Reptilian fauna of Mizoram, India	Cobra	47	2020-07-05	Journal article
414	Srinivasulu, C., Srinivasulu, B. and Nageswara Rao, C.A.	2006	2000-09	Herpetofauna	Mixed	3	No	Yes	No	Yes	Yes	1	0.33	0	0	0	1	0	0	0	0	Div	Reptilian fauna of Nagarjunasagar Srisailam Tiger Reserve, Andhra Pradesh	Records of the Zoological Survey of India	106(Part 3)	97-122	Journal article
415	Rohilla, M.S. and Tiwari, P.K.	2008	2000-09	Reptile	Chelonians	2	No	Yes	No	Yes	No	0	0	0	0	0	0	0	0	1	0	Evol	Restriction fragment length polymorphism of mitochondrial DNA and phylogenetic relationships among five species of Indian freshwater turtles	Journal of applied genetics	49	167-182	Journal article
416	Jayson, E.A., Sivaperuman, C. and Padmanabhan, P.	2006	2000-09	Reptile	Crocodile	3	No	Yes	No	Yes	No	0	0	0	0	0	0	1	0	0	0	Con	Review of the reintroduction programme of the mugger crocodile Crocodylus palustris in Neyyar reservoir, India	The Herpetological Journal	16(1)	69-76	Journal article
417	Seshadri, K.S., Yada, A. and Gururaja, K.V.	2009	2000-09	Amphibian	Mixed	3	No	Yes	No	Yes	No	0	0	0	1	0	0	0	0	0	0	Ecol	Road kills of amphibians in different land use areas from Sharavathi river basin, central Western Ghats, India	Journal of Threatened Taxa	1(11)	549-552	Journal article
418	Gower, D.J.	2003	2000-09	Reptile	Snakes	1	No	Yes	No	Yes	No	0	0	0	0	0	0	0	0	1	0	Evol	Scale microornamentation of uropeltid snakes	Journal of Morphology	258(2)	249-268	Journal article
419	Bijukumar, A., Kumar, M.S., Deepthi, G.R. and Mithun, S.	2007	2000-09	Reptile	Snakes	4	No	Yes	No	Yes	Yes	1	0.25	0	0	0	0	1	0	0	0	Con	Sea snakes associated with trawl by-catch of Kerala coast, India	Cobra	1(1)	2020-04-01	Journal article
420	Rohilla, M.S. and Tiwari, P.K.	2008	2000-09	Reptile	Chelonians	2	No	Yes	No	Yes	No	0	0	0	0	0	0	0	0	1	0	Evol	Simple method of blood sampling from Indian freshwater turtles for genetic studies	Acta Herpetologica	3(1)	65-69	Journal article
421	Wallach, V.	2006	2000-09	Reptile	Snakes	1	No	Yes	No	Yes	No	0	0	0	0	0	0	0	0	0	1	OT	Book review: Snakes of India: the field guide	Hamadryad	30(1-2)	217	Journal article
422	Ingle, M.	2001	2000-09	Reptile	Snakes	1	No	Yes	No	Yes	No	0	0	0	0	0	1	0	0	0	0	Div	Snakes of Madhya Pradesh, Ujjain & Malwa Region	Cobra	45	22-24	Journal article
423	Daniels, R.J.R.	2001	2000-09	Reptile	Snakes	1	No	Yes	No	Yes	No	0	0	0	0	0	1	0	0	0	0	Div	Snakes of Tamil Nadu: a status report	Cobra	44	11-17	Journal article
424	Palot, M.J. and Radhakrishnan, C.	2004	2000-09	Reptile	Chelonians	2	No	Yes	No	Yes	No	0	0	0	0	0	1	0	0	0	0	Div	Status and distribution of Turtle fauna (Testudines: Reptilia) in the Malabar part of Kerala, India	Records of the Zoological Survey of India	102(1-2)	27-39	Journal article
425	Choudhury, B.C., Bhupathy, S. and Hanfee, F.	2000	2000-09	Reptile	Chelonians	3	No	Yes	No	Yes	No	0	0	0	0	0	1	1	0	0	0	ConDiv	Status information on the tortoises and freshwater turtles of India	Chelonian Research Monographs	2	86-94	Journal article
426	Bhupathy, S.	2009	2000-09	Reptile	Chelonians	1	No	Yes	No	Yes	No	0	0	0	1	0	1	0	0	0	0	EcolDiv	Status, Distribution and Ecology of the Indian Flaphell turtle, Lissemys Punctata	ENVIS Bulletin: Wildlife and Protected Areas	12(1)	177 p.	Journal article
427	Sahoo, G., Mohapatra, B.K. and Dutta, S.K.	2009	2000-09	Reptile	Chelonians	3	Yes	No	Yes	No	Yes	1	0.33	0	0	0	0	0	1	0	0	Dev	Structural changes in olive ridley turtle eggshells during embryonic development	The Herpetological Journal	19(3)	143-149	Journal article
428	Dravidamani, S., Kannan, P., Kalaiarasan, V., Deepika, R., Gitanjali, J., Moss, J.R. and Rajan, S.	2006	2000-09	Reptile	Snakes	7	No	Yes	No	Yes	Yes	2	0.286	0	1	0	0	0	0	0	0	Ecol	Studies on the size composition and morphometry of common krait Bungarus caeruleus (Schneider, 1801) at the Irula Snake Catchers’ Industrial Cooperative Society, Vadanemmeli, Kanchipuram District	Cobra	64	2020-07-01	Journal article
429	Sharma, S.K.	2001	2000-09	Herpetofauna	Mixed	1	No	Yes	No	Yes	No	0	0	0	0	0	1	0	0	0	0	Div	Survey of herpetofauna of Kela Devi Wildlife Park and Bardod Closed Areas, Rajasthan.	Cobra	46	26-32	Journal article
430	Captain, A., Gower, D.J., David, P. and Bauer, A.M.	2004	2000-09	Reptile	Snakes	4	No	Yes	No	Yes	No	0	0	1	0	0	0	0	0	0	0	TX	Taxonomic status of the colubrid snake Sibynophis subpunctatus (Duméril, Bibron & Duméril, 1854)	Hamadryad	28	90-94	Journal article
431	Gower, D.J. and Winkler, J.D.	2007	2000-09	Reptile	Snakes	2	No	Yes	No	Yes	Yes	1	0.5	1	0	0	0	0	0	0	0	TX	Taxonomy of the Indian snake Xylophis Beddome (Serpentes: Caenophidia), with description of a new species	Hamadryad	31(2)	315-329	Journal article
432	Vijayakumar, S.P. and David, P.	2006	2000-09	Reptile	Snakes	2	No	Yes	No	Yes	No	0	0	1	0	0	1	0	0	0	0	TXDiv	Taxonomy, natural history and distribution of the snakes of the Nicobar Islands (India), based on new materials and with an emphasis on endemic species	Russian Journal of Herpetology	13(1)	11-40	Journal article
433	Datta, P.M., Manna, P., Ghosh, S.C. and Das, D.P.	2000	2000-09	Reptile	Chelonians	4	No	Yes	No	Yes	No	0	0	1	0	0	0	0	0	0	0	TX	The first Jurassic turtle from India	Paleontology	43(1)	99-109	Journal article
434	Srinivasulu, C. and Das, I.	2008	2000-09	Herpetofauna	Mixed	2	No	Yes	No	Yes	No	0	0	1	1	0	1	0	0	0	0	TXEcolDiv	The herpetofauna of Nallamala Hills, Eastern Ghats, India: an annotated checklist, with remarks on nomenclature, taxonomy, habitat use, adaptive types and Biogeography	Asiatic Herpetological Research	11	110-131	Journal article
435	Gaur, A., Reddy, A., Annapoorni,S., Satyarebala, B. and Shivaji, S.	2006	2000-09	Reptile	Chelonians	5	No	Yes	No	Yes	Yes	2	0.4	0	0	0	0	0	0	1	0	Evol	The origin of Indian Star tortoises (Geochelone elegans) based on nuclear and mitochondrial DNA analysis: A story of rescue and repatriation	Conservation Genetics	7	231-240	Journal article
436	Tripathy, B., Shanker, K. and Choudhury, B.	2007	2000-09	Reptile	Chelonians	3	No	Yes	No	Yes	No	0	0	0	0	0	1	1	0	0	0	EcolCon	The status of sea turtles and their habitats in the Lakshadweep Archipelago, India	Journal of the Bombay Natural History Society	103	33	Journal article
437	Menon, J.C., Joseph, J.K., and Kulkarni, K.	2007	2000-09	Reptile	Snakes	3	No	Yes	No	Yes	No	0	0	0	0	0	0	0	0	0	1	OT	Treatment of snakebites-A Resume	Cobra	1	1-21	Journal article
438	Bhupathy, S., Choudhury, B.C., Hanfee, F., Kaylar, S.M., Khan, M.H., Platt, S.G., and Rashid, S.M.A.	2000	2000-09	Reptile	Chelonians	7	No	Yes	No	Yes	Yes	1	0.14	0	0	0	0	1	0	0	0	Con	Turtle trade in south Asia: regional summary (Bangladesh, India, and Myanmar)	Chelonian Research Monographs	2	101-105	Journal article
439	Shanbhag, B.A.	2003	2000-09	Reptile	Mixed	1	Yes	No	Yes	No	Yes	1	1	0	0	0	0	0	0	1	0	Evol	Viviparity in reptiles	Current Science	84(11)	1385-1385	Journal article
440	Lobo, A., Pandav, B. and Vasudevan, K.	2004	2000-09	Reptile	Snakes	3	No	Yes	No	Yes	No	0	0	0	1	0	0	0	0	0	0	Ecol	Weight-length relationships in two species of marine snakes along the coast of Goa, Western India	Hamadryad	29	89-93	Journal article
441	Das, I. and Chanda, S.	2000	2000-09	Amphibian	Frogs	2	No	Yes	No	Yes	No	0	0	1	0	0	0	0	0	0	0	TX	A New Species of Scutiger (Anura: Megophryidae) From Nagaland, North-Eastern	The Herpetological Journal	10	69-72	Journal article
442	Vasudevan, K.	2001	2000-09	Amphibian	Frogs	1	No	Yes	No	Yes	No	0	0	0	0	1	0	0	0	0	0	BH	A foot flagging frog from the Western Ghats	Cobra	44	25-29	Journal article
443	Measey, G.J., Gower, D.J., Oommen, O.V. and Wilkinson, M.	2003	2000-09	Amphibian	Caecilians	4	No	Yes	No	Yes	No	0	0	0	1	0	0	0	0	0	0	Ecol	A mark–recapture study of the caecilian amphibian Gegeneophis ramaswamii (Amphibia: Gymnophiona: Caeciliidae) in southern India	Journal of Zoology	261	129-133	Journal article
444	Gower, D.J., Kupfer, A., Oommen, O.V., Himstedt, W., Nussbaum, R.A., Loader, S.P., Presswell, B., Mu ̈ller, H., Krishna, S.B., Boistel, R. and Wilkinson, M.	2002	2000-09	Amphibian	Caecilians	11	No	Yes	No	Yes	No	0	0	0	0	0	0	0	0	1	0	Evol	A molecular phylogeny of ichthyophiid caecilians (Amphibia: Gymnophiona: Ichthyophiidae): out of India or out of South East Asia?.	Proceedings of the Royal Society of London B	269(1500)	1563-1569	Journal article
445	Dubois, A., Ohler, A. and Biju, S.D.	2001	2000-09	Amphibian	Frogs	3	No	Yes	No	Yes	Yes	1	0.333333	1	0	0	0	0	0	0	0	TX	A new genus and species of Ranidae (Amphibia, Anura) from south-western India	Alytes	19(2-4)	53-79	Journal article
446	Giri, V.B. and Bauer, A.M.	2008	2000-09	Reptile	Lizards	2	No	Yes	No	Yes	No	0	0	1	0	0	0	0	0	0	0	TX	A new ground-dwelling Hemidactylus (Squamata: Gekkonidae) from Maharashtra, with a key to the Hemidactylus of India	Zootaxa	1700	21-34	Journal article
447	Giri, V.B., Bauer, A.M. and Gaikwad, K.S.	2009	2000-09	Reptile	Lizards	3	No	Yes	No	Yes	Yes	1	0.333333	1	0	0	0	0	0	0	0	TX	A new ground-dwelling species of Cnemaspis Strauch (Squamata: Gekkonidae) from the northern Western Ghats, Maharashtra, India	Zootaxa	2164(1)	49-60	Journal article
448	Biju, S.D., Van Bocxlaer, I., Giri, V.B., Roelants, K., Nagaraju, J. and Bossuyt, F.	2007	2000-09	Amphibian	Frogs	6	No	Yes	No	Yes	Yes	1	0.166667	1	0	0	0	0	0	0	0	TX	A new nightfrog, Nyctibatrachus minimus sp. nov.(Anura: Nyctibatrachidae): the smallest frog from India	Current Science	93(6)	854-858	Journal article
449	Sengupta, S., Hussain, B., Choudhury, P.K., Gogoi, J., Ahmed, M.F. and Choudhury, N.K.	2008	2000-09	Amphibian	Frogs	6	No	Yes	No	Yes	No	0	0	1	0	0	0	0	0	0	0	TX	A new species of Amolops (Anura: Ranidae) from Assam, north-eastern India	Hamadryad	32(1)	2020-05-12	Journal article
450	Das, I. and Sengupta, S.	2000	2000-09	Reptile	Lizards	2	No	Yes	No	Yes	No	0	0	1	0	0	0	0	0	0	0	TX	A new species of Cnemaspis (Sauria: Gekkonidae) from Assam, northeastern India	Journal of South Asian Natural History	5(1)	17-24	Journal article
451	Krishnamurthy, S.V., Reddy, A.H.M. and Gururaja, K.V.	2001	2000-09	Amphibian	Frogs	3	No	Yes	No	Yes	No	0	0	1	0	0	0	0	0	0	0	TX	A new species of frog in the genus Nyctibatrachus (Anura: Ranidae) from Western Ghats, India	Current Science	80(7)	887-891	Journal article
452	Mahony, S.	2009	2000-09	Reptile	Lizards	1	No	Yes	No	Yes	No	0	0	1	0	0	0	0	0	0	0	TX	A new species of gecko of the genus Hemidactylus (Reptilia: Gekkonidae) from Andhra Pradesh, India	Russian Journal of Herpetology	16(1)	27-34	Journal article
453	Ravichandran, M.S., Gower, D.J. and Wilkinson, M.	2003	2000-09	Amphibian	Caecilians	3	No	Yes	No	Yes	No	0	0	1	0	0	0	0	0	0	0	TX	A new species of Gegeneophis Peters (Amphibia: Gymnophiona: Caeciliidae) from Maharashtra, India	Zootaxa	350(1)	2020-01-08	Journal article
454	Giri, V.B., Wilkinson, M and Gower, D. J.	2003	2000-09	Amphibian	Caecilians	3	No	Yes	No	Yes	No	0	0	1	0	0	0	0	0	0	0	TX	A new species of Gegeneophis Peters (Amphibia: Gymnophiona: Caeciliidae) from southern Maharashtra, India, with a key to the species of the genus	Zootaxa	351(1)	2020-01-10	Journal article
455	Giri, V.B., Gower, D.J., and Wilkinson, M.	2004	2000-09	Amphibian	Caecilians	3	No	Yes	No	Yes	No	0	0	1	0	0	0	0	0	0	0	TX	A new species of Indotyphlus Taylor (Amphibia: Gymnophiona: Caeciliidae) from the Western Ghats, India	Zootaxa	739(1)	2020-01-19	Journal article
456	Das, I., Sengupta, S., Ahmed, M.F. and Dutta, S.K.	2004	2000-09	Amphibian	Frogs	4	No	Yes	No	Yes	No	0	0	1	0	0	0	0	0	0	0	TX	A new species of Kaloula (Anura: Microhylidae) from Assam State, North-eastern India	Hamadryad	29(1)	101-109	Journal article
457	Gururaja, K.V., Dinesh, K.P., Palot, M.J., Radhakrishnan, C. and Ramachandra, T.V.	2007	2000-09	Amphibian	Frogs	5	No	Yes	No	Yes	No	0	0	1	0	0	0	0	0	0	0	TX	A new species of Philautus Gistel (Amphibia: Anura: Rhacophoridae) from southern Western Ghats, India	Zootaxa	1621(1)	2020-01-16	Journal article
458	Dutta, S.K.	2003	2000-09	Amphibian	Frogs	1	No	Yes	No	Yes	No	0	0	1	0	0	0	0	0	0	0	TX	A new species of rhacophorid frog from Similipal Biosphere Reserve, Orissa, India	Russian Journal of Herpetology	10(1)	25-32	Journal article
459	Vasudevan, K.	2000	2000-09	Amphibian	Frogs	1	No	Yes	No	Yes	No	0	0	1	0	0	0	0	0	0	0	TX	A new species of Rhacophorus (Anura: Rhacophoridae) from the Western Ghats, India	Hamadryad	25	21-28	Journal article
460	Gower, D.J., Rajendran, A., Nussbaum, R.A. and Wilkinson, M.	2008	2000-09	Amphibian	Caecilians	4	No	Yes	No	Yes	No	0	0	1	0	0	0	0	0	0	0	TX	A new species of Uraeotyphlus (Amphibia: Gymnophiona: Uraeotyphlidae) of the malabaricus group	Herpetologica	64(2)	235-245	Journal article
461	Jose, J., Ramachandran, K.K. and Nair, P.V.	2007	2000-09	Reptile	Lizards	3	Yes	No	Yes	No	Yes	1	0.33	0	1	0	0	0	0	0	0	Ecol	A rare and little known lizard, Otocryptis beddomi, from the Myristica swamps of southern Kerala, India	Herpetological Bulletin	101	27-31	Journal article
462	Bauer, A.M. and Das, I.	2000	2000-09	Reptile	Lizards	2	No	Yes	No	Yes	No	0	0	1	0	0	0	0	0	0	0	TX	A review of the gekkonid genus Calodactylodes (Reptilia: Squamata) from India and Sri Lanka	Journal of South Asian Natural History	5(1)	25-35	Journal article
463	Nayak, S., Mahapatra, P.K., Mohanty, R.K. and Dutta, S.K.	2008	2000-09	Amphibian	Frogs	4	Yes	No	Yes	No	Yes	2	0.5	0	0	0	0	0	1	0	0	Dev	A skeletochronological analysis of age, growth and longevity of the Indian Green Frog Euphlyctis hexadactylus (LESSON, 1834)	Herpetozoa	20(3-4)	99-107	Journal article
464	Measey, G.J., Gower, D.J., Oommen, O.V. and Wilkinson, M.	2004	2000-09	Amphibian	Caecilians	4	No	Yes	No	Yes	No	0	0	0	1	0	0	0	0	0	0	Ecol	A subterranean generalist predator: diet of the soil-dwelling caecilian Gegeneophis ramaswamii (Amphibia; Gymnophiona; Caeciliidae) in southern India	Competus Rendus Biologies	327(1)	65-76	Journal article
465	Mahapatra, P.K., Nayak, S. and Dutta, S.K.	2007	2000-09	Amphibian	Frogs	3	Yes	No	Yes	No	Yes	2	0.666667	0	0	0	0	0	1	0	0	Dev	Age estimates for a population of the Indian Tree Frog Polypedates maculatus (GRAY, 1833)	Herpetozoa	21(1-2)	31-40	Journal article
466	Bahuguna, A.	2008	2000-09	Reptile	Lizards	1	Yes	No	Yes	No	Yes	1	1	0	1	0	0	0	0	0	0	Ecol	Altitudinal Variations in Morphological Characters of Laudakia tuberculata Hardwicke and Gray, 1827 from Western Himalayas (Uttarakhand), India	Russian Journal of Herpetology	15(3)	207-211	Journal article
467	Seshadri, K.S., Chandran, A.V. and Gururaja, K.V.	2008	2000-09	Amphibian	Frogs	3	No	Yes	No	Yes	No	0	0	0	0	0	1	0	0	0	0	Div	Anurans from wetlands of Puducherry, along the East Coast of India	Check List	8(1)	23-26	Journal article
468	Venugopal, D. and Devi Prasad, K.V.	2003	2000-09	Reptile	Crocodile	2	No	Yes	No	Yes	No	0	0	0	1	0	0	0	0	0	0	Ecol	Basking Behaviour and Survey of Marsh Crocodiles, Crocodylus palustris (Lesson, 1831) Inranganthittu Bird Sanctuary, Karnataka, India	Hamadryad	2792)	241-247	Journal article
469	Hussain, S.A.	2009	2000-09	Reptile	Crocodile	1	No	Yes	No	Yes	No	0	0	0	1	0	0	1	0	0	0	EcolCon	Basking site and water depth selection by gharial Gavialis gangeticus Gmelin 1789 (Crocodylia, Reptilia) in National Chambal Sanctuary, India and its implication for river conservation.	Aquatic Conservation: Marine and Freshwater Ecosystems	19(2)	127-133	Journal article
470	Saidapur, S.K.	2001	2000-09	Amphibian	Frogs	1	No	Yes	No	Yes	No	0	0	0	1	0	0	0	0	0	0	Ecol	Behavioral ecology of anuran tadpoles: the Indian scenario	Proceedings of the Indian Academy of Science B	67(6)	311-322	Journal article
471	Radder, R.S., Saidapur, S.K. and Shanbhag, B.A.	2006	2000-09	Reptile	Lizards	3	Yes	No	No	Yes	Yes	1	0.333333	0	1	1	0	0	0	0	0	EcolBH	Big boys on top: effects of body size, sex and reproductive state on perching behaviour in the tropical rock dragon, Psammophilus dorsalis	Animal Biology	56(3)	311-321	Journal article
472	Dutta, S.K.	2002	2000-09	Amphibian	Caecilians	1	No	Yes	No	Yes	No	0	0	0	0	0	0	0	0	0	1	OT	Book review: Gymnophiona (Amphibia) of India: A taxonomic study	Hamadryad	27	156-157	Journal article
473	Agarwal, I. and Mistry, V.	2008	2000-09	Amphibian	Frogs	2	No	Yes	No	Yes	No	0	0	0	0	0	1	0	0	0	0	Div	Bufo stuarti from western Arunachal Pradesh, India	Russian Journal of Herpetology	15(2)	166-168	Journal article
474	Ahmed, R. and Roy, D.	2001	2000-09	Amphibian	Frogs	2	No	Yes	Yes	Yes	Yes	1	0.5	0	0	1	0	0	0	0	0	BH	Call behaviour of four common Anurans	Cobra	46	9-16	Journal article
475	Chanda, S.K., Das, I. and Dubois, A.	2000	2000-09	Amphibian	Mixed	3	No	Yes	No	Yes	No	0	0	0	0	0	1	0	0	0	0	Div	Catalogue of amphibian types in the collection of the zoological survey of India	Hamadryad	25	100-128	Journal article
476	Shanbhag, B.A., Radder, R.S., Gramapurohit, N.P., Dheeraj, K.V., Ammanna, V.H., Pandav, B.N. and Saidapur, S.K.	2003	2000-09	Reptile	Lizards	7	Yes	No	Yes	No	Yes	2	0.25	0	1	0	0	0	0	0	0	Ecol	Demography of fan-throated lizard, Sitana ponticeriana (Cuvier) in a cotton field in Dharwad district of Karnataka state, India	Current Science	85(9)	1363-1366	Journal article
477	Vasudevan, K., Kumar, A., Noon, B.R. and Chellam, R.	2008	2000-09	Amphibian	Frogs	4	No	Yes	No	Yes	No	0	0	0	1	0	1	0	0	0	0	EcolDiv	Density and diversity of forest floor anurans in the rain forests of southern Western Ghats, India	Herpetologica	64(2)	207-215	Journal article
478	Hiragond, N.C., Shanbhag, B.A. and Saidapur, S.K.	2001	2000-09	Amphibian	Frogs	3	No	Yes	No	Yes	Yes	1	0.333333	1	0	0	0	0	0	0	0	TX	Description of the tadpole of a stream breeding frog, Rana curtipes	Journal of Herpetology	35(1)	166	Journal article
479	Mathew, R. and Sen, N.	2007	2000-09	Amphibian	Frogs	2	Yes	No	Yes	No	Yes	2	1	1	0	0	0	0	0	0	0	TX	Description of two new species of Xenophrys (Amphibia: Anura: Megophryidae) from north-east India	Cobra	1(2)	18-28	Journal article
480	Giri, V.B., Agarwal, I. and Bauer, A.M.	2009	2000-09	Reptile	Lizards	3	No	Yes	No	Yes	No	0	0	1	0	0	1	0	0	0	0	TXDiv	Designation of a neotype for Cnemaspis mysoriensis (Jerdon 1853)(Sauria: Gekkonidae), with a redescription and notes on its distribution and habitat	Russian Journal of Herpetology	16(4)	256-264	Journal article
481	Krishnamurthy, S.V., Gururaja K.V. and Reddy, A.M.	2002	2000-09	Amphibian	Frogs	3	No	Yes	No	Yes	No	0	0	0	0	0	0	0	1	0	0	Dev	Direct development in Philautus glandulosus (Anura: Rhacophoridae)	Herpetological Natural History	9(1)	97-102	Journal article
482	Oommen, O.V., Measey, G.J., Gower, D.J. and Wilkinson, M.	2000	2000-09	Amphibian	Caecilians	4	No	Yes	No	Yes	No	0	0	0	0	0	1	0	0	0	0	Div	Distribution and abundance of the caecilian Gegeneophis ramaswamii (Amphibia: Gymnophiona) in southern Kerala	Current science	79(9)	1386-1389	Journal article
483	Saidapur, S.K., Gramapurohit, N.P. and Shanbhag, B.A.	2001	2000-09	Amphibian	Frogs	3	No	Yes	No	Yes	Yes	1	0.333333	0	0	0	0	0	1	0	0	Dev	Effect of sex steroids on gonadal differentiation and sex reversal in the frog, Rana curtipes	General and Comparative Endocrinology	124(1)	115-123	Journal article
484	Pandav, B.N, Shanbhag, B.A. and Saidapur, S.K.	2007	2000-09	Reptile	Lizards	3	Yes	No	Yes	No	Yes	2	0.666667	0	0	1	0	0	0	0	0	BH	Ethogram of courtship and mating behaviour of garden lizard, Calotes	Current Science	93(8)	1164-1167	Journal article
485	Radder, R.S. and Shanbhag, B.A.	2004	2000-09	Reptile	Lizards	2	No	Yes	Yes	No	Yes	1	0.5	0	1	0	0	0	0	0	0	Ecol	Factors influencing offspring traits in the oviparous multi-clutched lizard,Calotes versicolor (Agamidae)	Journal of Biosciences	29(1)	105-110	Journal article
486	Mathew, R. and Sen, N.	2005	2000-09	Amphibian	Frogs	2	Yes	No	Yes	No	Yes	2	1	0	0	0	0	0	0	0	1	OT	Fejervarya teraiensis (Dubois)(Ranidae: Anura: Amphibia)	Cobra	59(1)	4	Journal article
487	Krishna, S. and Krishna, S.	2005	2000-09	Amphibian	Frogs	2	Yes	No	Yes	No	Yes	1	0.5	0	0	1	0	0	0	0	0	BH	Female courtship calls of the litter frog (Rana curtipes) in the tropical forests of Western Ghats, South India	Amphibia-Reptilia	26(4)	431-435	Journal article
488	Vyas, R.	2005	2000-09	Reptile	Lizards	1	No	Yes	No	Yes	No	0	0	0	0	0	1	0	0	0	0	Div	First record of Asian house gecko Hemidactylus frenatus (Schlegel) from Gujarat State, western India	Cobra	60	13-17	Journal article
489	Vyas, R., Giri, V.B. and Bauer, A.M.	2006	2000-09	Reptile	Lizards	3	No	Yes	No	Yes	No	0	0	0	0	0	1	0	0	0	0	Div	First record of Hemidactylus persicus Anderson, 1872 (Squamata: Sauria: Gekkonidae) from the Republic of India, with notes on its distribution	Hamadryad	30	209	Journal article
490	Vyas, R.	2004	2000-09	Reptile	Lizards	1	No	Yes	No	Yes	No	0	0	0	0	0	1	0	0	0	0	Div	First record of Mabuya allapallensis from Gujarat State, India	Hamadryad	28	136-138	Journal article
491	Vyas, R.	2003	2000-09	Reptile	Lizards	1	No	Yes	No	Yes	No	0	0	0	0	0	1	0	0	0	0	Div	First record of Ophisops beddomei (Jerdon, 1870) from Gujarat State, western India	Hamadryad	27	280-281	Journal article
492	Paul, S., Biswas, M.C. and Deuti, K.	2007	2000-09	Amphibian	Frogs	3	No	Yes	No	Yes	No	0	0	0	0	0	1	0	0	0	0	Div	First record of the Assam Painted Frog Kaloula assamensis (Das et al. 2004) from West Bengal	Cobra	1	15-16	Journal article
493	Agarwal, I.	2009	2000-09	Reptile	Lizards	1	No	Yes	No	Yes	No	0	0	0	0	0	1	0	0	0	0	Div	First Record of Tropiocolotes persicus euphorbiacola Minton, Anderson and Anderson 1970 (Sauria: Gekkonidae) from the Republic of India, with Notes on Its Habitat …	Russian Journal of Herpetology	16(2)	83-87	Journal article
494	Srinivasulu,C., Siliwal, M., Rajesh, A., Venkateshwarulu, P., Rama Krishna, I.S., Rao, C.A.N. and Thulsi Rao, K.	2006	2000-09	Amphibian	Frogs	7	No	Yes	No	Yes	Yes	1	0.14	0	0	0	1	0	0	0	0	Div	First record of Uperodon globulosus (Gunther, 1864)(Anura: Microhylidae) from Andhra Pradesh, India	Hamadryad	30(1)	194-196	Journal article
495	Aravind, N.A.	2002	2000-09	Amphibian	Frogs	1	No	Yes	No	Yes	No	0	0	0	0	0	1	0	0	0	0	Div	First report of Micrixalus nudis (Amphibia: Ranidae) from Karnataka, India	Hamadryad	27(1)	117	Journal article
496	Dey, M.	2008	2000-09	Amphibian	Frogs	1	Yes	No	Yes	No	Yes	1	1	0	0	1	0	0	0	0	0	BH	Food habits of anuran larvae from Barak Valley, North-eastern India	Hamadryad	33	107-117	Journal article
497	Pandav, B.N., Shanbhag, B.A. and Saidapur, S.K.	2006	2000-09	Reptile	Lizards	3	Yes	No	Yes	No	Yes	2	0.666667	0	0	0	0	0	1	0	0	Dev	Functional significance of posthatching residual yolk in the lizard, Calotes versicolor	Journal of Herpetology	40(3)	385-387	Journal article
498	Sen, N.	2004	2000-09	Amphibian	Mixed	1	Yes	No	Yes	No	Yes	1	1	0	0	0	1	0	0	0	0	Div	Further Notes on Statewise Distribution of the Amphibian Fauna of North East India	Records of the Zoological Survey of India	102	2020-03-04	Journal article
499	Shanbhag, B.A., Radder, R.S. and Saidapur, S.K.	2000	2000-09	Reptile	Lizards	3	Yes	No	Yes	No	Yes	1	0.333333	0	0	0	0	0	1	0	0	Dev	GnRH but not warm temperature induces recrudescence of quiescent testes in the tropical lizard Calotes versicolor (Daud.) during postbreeding phase	General and Comparative Endocrinology	119(2)	232-238	Journal article
500	Saidapur, S.K. and Girish, S.	2001	2000-09	Amphibian	Frogs	2	No	Yes	No	Yes	No	0	0	0	0	0	0	0	1	0	0	Dev	Growth and metamorphosis of Bufo melanostictus tadpoles: effects of kinship and density	Journal of Herpetology	35 (2)	249-254	Journal article
501	Reddy, A.H., Gururaja, K.V. and Krishnamurthy, S.V.	2002	2000-09	Amphibian	Frogs	3	No	Yes	No	Yes	No	0	0	0	1	0	0	0	0	0	0	Ecol	Habitat features of an endemic anuran Micrixalus saxicola Jerdon, 1853 (Amphibia: Ranidae) in central Western Ghats, India	Amphibia-Reptilia	23 (3)	370-374	Journal article
502	Gururaja, K.V., Reddy, A.M., Keshavayya, J. and Krishnamurthy, S.V.	2003	2000-09	Amphibian	Frogs	4	No	Yes	No	Yes	No	0	0	0	1	0	0	0	0	0	0	Ecol	Habitat occupancy and influence of abiotic factors on the occurrence of Nyctibatrachus major (Boulenger) in central Western Ghats, India	Russian Journal of Herpetology	10	87-92	Journal article
503	Mahony, S. and Zug, G.R.	2008	2000-09	Reptile	Lizards	2	No	Yes	No	Yes	No	0	0	0	0	0	1	0	0	0	0	Div	Hemidactylus karenorum (Squamata, Gekkonidae) in India	Hamadryad	32(1)	84-86	Journal article
504	Saidapur, S.K., Radder, R.S. and Shanbhag, B.A.	2002	2000-09	Reptile	Lizards	3	No	Yes	Yes	No	Yes	1	0.333333	0	0	0	0	0	1	0	0	Dev	Influence of incubation temperature and substrate on eggs and embryos of the garden lizard, Calotes versicolor (Daud.)	Amphibia Reptilia	23(1)	71-82	Journal article
505	Sailo, S., Lalremsanga, H.T., Hooroo, R.N.K and Ohler, A.	2009	2000-09	Amphibian	Frogs	4	Yes	No	Yes	No	Yes	3	0.75	0	0	0	1	0	0	0	0	Div	Ingerana borealis (Annandale, 1912): a new record from Mizoram (India), with notes on its systematic position and natural history	Alytes	27(1)	1	Journal article
506	Radder, R.S. and Shanbhag, B.A.	2003	2000-09	Reptile	Lizards	2	No	Yes	Yes	No	Yes	1	0.5	0	1	0	0	0	0	0	0	Ecol	Interrelationships among reproductive traits of female lizard, Sitana ponticeriana (Cuvier)	Current Science	85(1)	89-91	Journal article
507	Veeranagoudar, D.K., Radder, R.S., Shanbhag, B.A. and Saidapur, S.K.	2009	2000-09	Amphibian	Frogs	4	No	No	No	Yes	Yes	1	0.25	0	0	1	0	0	0	0	0	BH	Jumping behavior of semiterrestrial tadpoles of Indirana beddomii (Günth.): relative importance of tail and body size	Journal of Herpetology	43(4)	680-684	Journal article
508	Dutta, S.K., Vasudevan, K., Chaitra, M.S., Shanker, K. and Agarwal, R.K.	2004	2000-09	Amphibian	Frogs	5	No	Yes	No	Yes	Yes	1	0.2	0	0	0	0	0	0	1	0	Evol	Jurassic frogs and the evolution of amphibian endemism in the Western Ghats	Current Science	86(1)	211-216	Journal article
509	Eremchenko, V.K. and Das, I.	2004	2000-09	Reptile	Lizards	2	No	Yes	No	Yes	No	0	0	1	0	0	0	0	0	0	0	TX	Kaestlea: a new genus of scincid lizards (Scincidae: Lygosominae) from the Western Ghats, south-western India	Hamadryad	28(1)	43-50	Journal article
510	Dutta, S.K., Ahmed, M.F. and Das, I.	2000	2000-09	Amphibian	Frogs	3	No	Yes	No	Yes	No	0	0	1	0	0	0	0	0	0	0	TX	Kalophrynus (Anura: Microhylidae), a new genus for India, with the description of a new species, Kalophrynus orangensis, from Assam State	Hamadryad	25	67-74	Journal article
511	Gramapurohit, N.P., Shanbhag, B.A. and Saidapur, S.K.	2008	2000-09	Amphibian	Frogs	3	No	Yes	No	Yes	Yes	1	0.333333	0	0	0	0	0	1	0	0	Dev	Kinship influences larval growth and metamorphic traits of Bufo scaber in a context-dependent manner	Journal of Herpetology	42(1)	39-45	Journal article
512	Das, I. and Chanda, S.K.	2004	2000-09	Amphibian	Frogs	2	No	Yes	No	Yes	No	0	0	1	0	0	0	0	0	0	0	TX	Leptobrachium smithi Matsui, Nabitabhata and Panha, 1999 (Anura: Megophyridae), an addition to the Fauna of Myanmar (Burma)	Asiatic Herpetological Research	10	245-246	Journal article
513	Shanbhag, B.A., Saidapur, S.K. and Radder, R.S.	2003	2000-09	Reptile	Lizards	3	Yes	No	Yes	No	Yes	1	0.333333	0	1	0	0	0	1	0	0	EcolDev	Lowering body temperature induces embryonic diapause during prolonged egg retention in the lizard, Calotes versicolor	Naturwissenschaften	90	33-35	Journal article
514	Shanbhag, B.A., Radder, R.S. and Saidapur, S.K.	2000	2000-09	Reptile	Lizards	3	Yes	No	Yes	No	Yes	1	0.333333	0	1	0	0	0	1	0	0	EcolDev	Maternal Size Determines Clutch Mass, whereas Breeding Timing Influences Clutch and Egg Sizes in the Tropical Lizard, Calotes versicolor (Agamidae)	Copeia	2000(4)	1062-1067	Journal article
515	Ishwar, N.M.	2000	2000-09	Amphibian	Frogs	1	No	Yes	No	Yes	No	0	0	0	0	0	1	0	0	0	0	Div	Melanobatrachus indicus Beddome, 1878, resighted at the Anaimalai Hills, southern India	Hamadryad	25	51-51	Journal article
516	Shanbhag, B.A., Radder, R.S. and Saidapur, S.K.	2002	2000-09	Reptile	Lizards	3	Yes	No	Yes	No	Yes	1	0.333333	0	1	0	0	0	0	0	0	Ecol	Members of opposite sex mutually regulate gonadal recrudescence in the lizardCalotes versicolor (Agamidae)	Journal of Biosciences	27(5)	529-537	Journal article
517	Grosselet, O., Sengupta, S., Gupta, A., Vauche, M. and Gupta, S.	2004	2000-09	Amphibian	Frogs	5	No	Yes	No	Yes	Yes	2	0.4	0	0	1	1	0	0	0	0	BHDiv	Microhyla heymonsi Vogt, 1911 (Anura: Microhylidae) from mainland India, with bioacoustic analysis of its advertising call	Hamadryad	29(1)	131-133	Journal article
518	Dutta, S.K. and Ray, P.	2000	2000-09	Amphibian	Frogs	2	No	Yes	No	Yes	No	0	0	1	0	0	0	0	0	0	0	TX	Microhyla sholigari, a new species of microhylid frog (Anura: Microhylidae) from Karnataka, India	Hamadryad	25	38-44	Journal article
519	Das, I. and Kunte, K.	2005	2000-09	Amphibian	Frogs	2	No	Yes	No	Yes	No	0	0	1	0	0	0	0	0	0	0	TX	New species of Nyctibatrachus (Anura: Ranidae) from Castle Rock, Karnataka State, Southwest India	Journal of Herpetology	39(3)	465-470	Journal article
520	Biju, S.D. and Bossuyt, F.	2005	2000-09	Amphibian	Frogs	2	No	Yes	No	Yes	No	0	0	1	0	0	0	0	0	0	0	TX	New Species of Philautus (Anura: Ranidae, Rhacophorinae) from Ponmudi Hill in the Western Ghats of India	Journal of Herpetology	39(3)	349-353	Journal article
521	Das, I. and Dutta, S.K.	2006	2000-09	Amphibian	Frogs	2	No	Yes	No	Yes	No	0	0	1	0	0	0	0	0	0	0	TX	New Species of Polypedates (Anura: Rhacophoridae) from the Western Ghats, Southwest India	Journal of Herpetology	40(2)	214-220	Journal article
522	Das, I. and Vijayakumar, S.P.	2009	2000-09	Reptile	Lizards	2	No	Yes	No	Yes	No	0	0	1	0	0	0	0	0	0	0	TX	New species of Ptychozoon (Sauria: Gekkonidae) from the Nicobar Archipelago, Indian Ocean	Zootaxa	2095(1)	2020-12-08	Journal article
523	Giri, V.B., Bauer, A.M., Vyas, R. and Patil, S.	2009	2000-09	Reptile	Lizards	4	No	Yes	No	Yes	No	0	0	1	0	0	0	0	0	0	0	TX	New species of rock-dwelling Hemidactylus (Squamata: Gekkonidae) from Gujarat, India	Journal of Herpetology	43(3)	385-393	Journal article
524	Orlov, N.L., Dutta, S.K., Ghate, H.V. and Kent, Y.	2006	2000-09	Amphibian	Frogs	4	No	Yes	No	Yes	No	0	0	1	0	0	0	0	0	0	0	TX	New species of Theloderma from Kon Tum Province (Vietnam) and Nagaland State (India)(Anura: Rhacophoridae)	Russian Journal of Herpetology	13(2)	135-154	Journal article
525	Das, I.	2000	2000-09	Amphibian	Frogs	1	No	Yes	No	Yes	No	0	0	1	0	0	0	0	0	0	0	TX	Nomenclatural history and rediscovery of Rhacophorus lateralis Boulenger, 1883 (Amphibia: Rhacophoridae)	Current Herpetology	19(1)	35-40	Journal article
526	Das, I. and Gemel, R.	2000	2000-09	Reptile	Lizards	2	No	Yes	No	Yes	No	0	0	1	0	0	1	0	0	0	0	TXDiv	Nomenclatural status of Fitzinger's (1861) Pseudocalotes archiducissae, and confirmation of Bronchocela cristatella (Kuhl, 1820) from the Nicobar Archipelago …	Herpetozoa	13(1-2)	55-58	Journal article
527	Mathew, R.	2006	2000-09	Reptile	Lizards	1	Yes	No	Yes	No	Yes	1	1	0	0	0	1	0	0	0	0	Div	North eastern water skink Tropidophorus assamensisAnnandale (Reptilia: Sauria: Scincidae) in Mizoram, northeast India	Cobra	63	14-15	Journal article
528	Mathew, R. and Sen, N.	2006	2000-09	Amphibian	Frogs	2	Yes	No	Yes	No	Yes	2	1	0	0	0	0	0	1	0	0	Dev	Notes on abnormalities/deformities in anurans (Amphibia)	Cobra	63	6-10	Journal article
529	Chandra, K. and Pandey, V.K.	2004	2000-09	Amphibian	Frogs	2	No	Yes	No	Yes	No	0	0	0	0	0	1	0	0	0	0	Div	Notes on Anuran fauna of Achanakmar Wildlife Sanctuary	Cobra	57	32-37	Journal article
530	Biswas, S.	2000	2000-09	Amphibian	Frogs	1	No	Yes	No	Yes	No	0	0	0	0	1	0	0	0	0	0	BH	Notes on the breeding habits of Chirixalus dudhwaensis Ray 1992, from Uttar Pradesh, north India	Hamadryad	25	200-203	Journal article
531	Vyas, R.	2009	2000-09	Reptile	Lizards	1	No	Yes	No	Yes	No	0	0	0	1	0	1	0	0	0	0	EcolDiv	Notes on the distribution and natural history of an endemic skink from India: Lygosoma lineata (Gray, 1839)	Sauria	31(1)	45-50	Journal article
532	Gaikwad, K.S., Kulkarni, H., Bhambure, R. and Giri, V.N.	2009	2000-09	Reptile	Lizards	4	Yes	No	Yes	No	Yes	1	0.25	0	1	0	1	0	0	0	0	EcolDiv	Notes on the distribution, natural history and variation of Hemidactylus albofasciatus (Grandison and Soman, 1963)(Squamata: Gekkonidae)	Journal of the Bombay Natural History Society	106(3)	305-312	Journal article
533	Bauer, A.M., Firoz, F. and Das, A.M.	2008	2000-09	Reptile	Lizards	3	No	Yes	No	Yes	No	0	0	1	0	0	1	0	0	0	0	TXDiv	Notes on the distributions, taxonomy and biology of the skinkEutropis dissimilis (Reptilia: Squamata: Scincidae), with first records from Assam, India	Hamadryad	32	76-80	Journal article
534	Venugopal, D.	2006	2000-09	Reptile	Crocodile	1	No	Yes	No	Yes	No	0	0	0	1	0	0	0	0	0	0	Ecol	Observations on Mugger Crocodylus palustris Lesson feeding on birds in Ranganthittu Bird Sanctuary, Karnataka, India.	Journal of the Bombay Natural History Society	103(1)	105	Journal article
535	Das, S.K.	2004	2000-09	Reptile	Lizards	1	No	Yes	No	Yes	No	0	0	0	0	1	0	0	0	0	0	BH	Observations on peculiar fossorial habit of sand fish, Ophiomorus raithmai Anderson and Leviton, 1966 and toad agama, Phrynocephalus laungwalansis …	Cobra	55	11-14	Journal article
536	Ravikumar, M.V.	2000	2000-09	Amphibian	Frogs	1	No	Yes	No	Yes	No	0	0	0	0	0	1	0	0	0	0	Div	Occurrence of black torrent toad, Ansonia ornata Suganthagiri Hills, Wayanad, Kerala, Cobra	Cobra	41	2020-10-11	Journal article
537	Mathew, R.	2006	2000-09	Reptile	Lizards	1	Yes	No	Yes	No	Yes	1	1	0	0	0	1	0	0	0	0	Div	On the occurrence of Japalura variegata Gray (Reptilia: Sauria: Agamidae) in Mizoram, northeast India	Cobra	64	14-15	Journal article
538	Agarwal, I., Mistry, V. and Tillack, F.	2009	2000-09	Reptile	Lizards	3	No	Yes	No	Yes	No	0	0	0	1	0	0	0	0	0	0	Ecol	On the Rajasthan Toad-headed Lizard, Bufoniceps laungwalaensis (Sharma, 1978) an endemic Agamid from the Thar Desert	Sauria	30	37-48	Journal article
539	Bauer, A.M., Giri, V.B., Greenbaum, E., Jackman, T.R., Dharne, M.S. and Shouche, Y.S.	2008	2000-09	Reptile	Lizards	6	No	Yes	No	Yes	No	0	0	1	0	0	0	0	0	0	0	TX	On the systematics of the gekkonid genus Teratolepis Günther, 1869: another one bites the dust	Hamadryad	33(1)	13-27	Journal article
540	Radder, R.S., Shanbhag, B.A. and Saidapur, S.K.	2001	2000-09	Reptile	Lizards	3	No	Yes	Yes	No	Yes	1	0.333333	0	1	0	0	0	0	0	0	Ecol	Ontogeny of sexual size dimorphism in the tropical garden lizard, Calotes versicolor (Daud.)	Journal of Herpetology	35(1)	156-160	Journal article
541	Gramapurohit, N.P., Shanbhag, B.A. and Saidapur, S.K.	2000	2000-09	Amphibian	Frogs	3	No	Yes	No	Yes	Yes	1	0.333333	0	0	0	0	0	1	0	0	Dev	Pattern of gonadal sex differentiation, development, and onset of steroidogenesis in the frog, Rana curtipes	General and Comparative Endocrinology	119 (3)	256-264	Journal article
542	Radder, R.S., Shanbhag, B.A. and Saidapur, S.K.	2002	2000-09	Reptile	Lizards	3	No	Yes	Yes	No	Yes	1	0.333333	0	1	0	0	0	1	0	0	EcolDev	Pattern of yolk internalization by hatchlings is related to breeding timing in the garden lizard, Calotes versicolor	Current Science	82(1)	1484-1486	Journal article
543	Naniwadekar, R. and Vasudevan, K.	2007	2000-09	Amphibian	Frogs	2	No	Yes	No	Yes	No	0	0	0	0	0	1	0	0	0	0	Div	Patterns in diversity of anurans along an elevational gradient in the Western Ghats, South India	Journal of Biogeography	34 (5)	842-853	Journal article
544	Gururaja, K.V. and Ramachandra, T.V.	2006	2000-09	Amphibian	Frogs	2	No	Yes	No	Yes	No	0	0	0	0	1	1	0	0	0	0	BHDiv	Pedostibes tuberculosus (Malabar Tree Toad) advertisement call and distribution	Herpetological Review	37 (1)	75-76	Journal article
545	Measey, G.J., Gower, D.J., Oommen, O.V. and Wilkinson, M.	2001	2000-09	Amphibian	Caecilians	4	No	Yes	No	Yes	No	0	0	0	1	0	0	0	0	0	0	Ecol	Permanent marking of a fossorial caecilian, Gegeneophis ramaswamii (Amphibia: Gymnophiona: Caeciliidae)	Journal of South Asian Natural History	5	141-147	Journal article
546	Biju, S.D., Roelants, K. and Bossuyt, F.	2008	2000-09	Amphibian	Frogs	3	No	Yes	No	Yes	No	0	0	1	0	0	0	0	0	0	0	TX	Phylogenetic position of the montane treefrog Polypedates variabilis Jerdon, 1853 (Anura: Rhacophoridae), and description of a related species	Organisms Diversity & Evolution	8 (4)	267-276	Journal article
547	Wilkinson, M., Jonathan A.S., Oommen, O.V. and Cohen, B.L.	2002	2000-09	Amphibian	Caecilians	4	No	Yes	No	Yes	No	0	0	0	0	0	0	0	0	1	0	Evol	Phylogenetic relationships of Indian caecilians (Amphibia: Gymnophiona) inferred from mitochondrial rRNA gene sequences	Molecular Phylogenetics and Evolution	23 (3)	401-407	Journal article
548	San Mauro, D., Gower, D.J., Oommen, O.V., Wilkinson, M. and Zardoya, R.	2004	2000-09	Amphibian	Caecilians	4	No	Yes	No	Yes	No	0	0	1	0	0	0	0	0	0	0	TX	Phylogeny of caecilian amphibians (Gymnophiona) based on complete mitochondrial genomes and nuclear RAG1	Molecular Phylogenetics and Evolution	33	413-427	Journal article
549	Shanbhag, B.A., Radder, R.S. and Saidapur, S.K.	2001	2000-09	Reptile	Lizards	3	Yes	No	Yes	No	Yes	1	0.33	0	0	0	0	0	1	0	0	Dev	Plasma progesterone levels and luteal activity during gestation and prolonged oviductal egg retention in a tropical lizard, Calotes versicolor	General and Comparative Endocrinology	123(1)	73-79	Journal article
550	Gramapurohit, N.P., Shanbhag, B.A., and Saidapur S.K.	2005	2000-09	Amphibian	Frogs	3	No	Yes	No	Yes	Yes	1	0.333333	0	0	0	0	0	1	0	0	Dev	Post-metamorphic growth, sexual maturation and body size dimorphism in the skipper frog, Euphlyctis cyanophlyctis (Schneider)	The Herpetological Journal	15 (2)	113-119	Journal article
551	Ohler, A. and Mallick, P.K.	2002	2000-09	Amphibian	Frogs	2	Yes	No	Yes	No	Yes	1	0.5	1	0	0	0	0	0	0	0	TX	Rana (Hylarana) sensu Dubois (1992) in India and the identity of Hylorana tytleri Theobald, 1868	Hamadryad	27 (1)	57-65	Journal article
552	Hussain, B., Gogoi, J., Choudhury, N.K., Baruah, B.K., Sharma, D.K., Kalita, J. and Sengupta, S.	2007	2000-09	Amphibian	Frogs	7	No	Yes	No	Yes	No	0	0	1	1	0	1	0	0	0	0	TXEcolDiv	Rana humeralis—a new record from Assam and Arunachal Pradesh, India, with notes on its morphometry and natural history	Russian Journal of Herpetology	14 (3)	161-171	Journal article
553	Reddy, A.H.M., Gururaja, K.V., Ravichandran, M.S. and Krishnamurthy, S.V.	2001	2000-09	Amphibian	Frogs	4	No	Yes	No	Yes	No	0	0	0	0	0	1	0	0	0	0	Div	Range extension of Ansonia ornata (Gunther, 1875) and Indirana brachytarsus (Gunther, 1875)	Hamadryad	26	358-359	Journal article
554	Sen, N. and Mathew, R.	2003	2000-09	Amphibian	Frogs	2	Yes	No	Yes	No	Yes	2	1	0	0	0	1	0	0	0	0	Div	Range extension of Pterorana khare Kiyasetuo and Khare 1986 (Anura: Ranidae) with notes on some morphological characters	Cobra	53	2020-05-08	Journal article
555	Talukdar, S., Soud, R. and Deuti, K.	2007	2000-09	Amphibian	Frogs	3	Yes	No	Yes	Yes	Yes	1	0.33	0	0	0	1	0	0	0	0	Div	Range extension of the Assam Painted Frog, Kaloula assamensis Das et al.(Anura: Microhylidae) to the western Assam	Cobra	1(1)	18-20	Journal article
556	Dey, M. and Gupta, A.	2000	2000-09	Amphibian	Frogs	2	Yes	No	No	Yes	Yes	1	0.5	0	0	0	1	0	0	0	0	Div	Record of Kaloula pulchra (Gray, 1831)(Anura: Microhylidae) from Cachar District, Assam, north-eastern India	Hamadryad	25(2)	214-215	Journal article
557	Sailo, S., Kharbuli, B. and Hooroo, R.N.K.	2005	2000-09	Amphibian	Frogs	3	Yes	No	Yes	No	Yes	2	0.67	0	0	1	1	0	0	0	0	BHDiv	Record of Kaloula pulchra (Grey, 1831) from Mizoram, northeast India with notes on its burrowing behavior	Cobra	62	25-28	Journal article
558	Dey, M. and Ramanujam, S.N.	2003	2000-09	Amphibian	Frogs	2	Yes	No	Yes	No	Yes	1	0.5	0	0	0	1	0	0	0	0	Div	Record of Pterorana khare Kiyasetuo and Khare, 1986 (Anura: Ranidae) from Aizwal District, Mizoram, north-eastern India	Hamadryad	27	255-256	Journal article
559	Lalremsanga, H.T., Sailo, S. and Hooroo, R.N.K.	2007	2000-09	Amphibian	Frogs	3	No	Yes	No	Yes	Yes	2	0.67	0	0	0	1	0	0	0	0	Div	Record of Rana chloronota (Günther, 1875) (Anura: Ranidae) from Mizoram, north-eastern India	Hamadryad	31(2)	359	Journal article
560	Dey, M. and Gupta, A.	2000	2000-09	Amphibian	Frogs	2	Yes	No	No	Yes	Yes	1	0.5	0	0	0	1	0	0	0	0	Div	Records of Kaloula pulchra (Gray, 1831)(Anura: Microhylidae) from Cachar district, Assam, northeast India	Hamadryad	25	214-215	Journal article
561	Bhupathy, S., Chettri, B. and Bauer, A.M.	2009	2000-09	Reptile	Lizards	3	No	Yes	No	Yes	Yes	1	0.333333	1	0	0	0	0	0	0	0	TX	Rediscovery and revalidation of Takydromus sikkimensis (Günther, 1888)(Squamata: Lacertidae) from Sikkim, India	Journal of Herpetology	43(2)	267-274	Journal article
562	Deuti, K., Biswas, S., Ahmed, M.F. and Dutta, S.K.	2000	2000-09	Amphibian	Frogs	4	No	Yes	No	Yes	No	0	0	0	0	0	1	0	0	0	0	Div	Rediscovery of Chirixalus simus Annandale, 1915 (Anura: Rhacophoridae) from Assam and West Bengal, eastern India	Hamadryad	25	215-217	Journal article
563	Gower, D.J., Giri, V.B. and, Wilkinson, M.	2007	2000-09	Amphibian	Caecilians	3	No	Yes	No	Yes	No	0	0	1	0	0	0	0	0	0	0	TX	Rediscovery of Gegeneophis seshachari RAVICHANDRAN, GOWER & WILKINSON, 2003 at the type locality	Herpetozoa	19(3-4)	121-127	Journal article
564	Kunte, K. and Manthey, U.	2009	2000-09	Reptile	Lizards	2	No	Yes	No	Yes	No	0	0	0	0	0	1	0	0	0	0	Div	Rediscovery of Japalura sagittifera from the Eastern Himalayas, Arunachal Pradesh: An addition to the Indian Herpetofauna	Sauria	31(2)	49-55	Journal article
565	Matthew, R. and Sen, N.	2003	2000-09	Amphibian	Frogs	2	Yes	No	Yes	No	Yes	2	1	0	0	0	1	0	0	0	0	Div	Rediscovery of Micrixalus borealis Annandale, 1912 (Ranidae: Anura: Amphibia) from Meghalaya, India	Cobra	53	2020-01-04	Journal article
566	Das, A. and Das, I.	2007	2000-09	Reptile	Lizards	2	No	Yes	No	Yes	No	0	0	0	0	0	1	0	0	0	0	Div	Rediscovery of Mictopholis austeniana (Annandale, 1908)(Squamata: Agamidae)	Current herpetology	26(1)	45-47	Journal article
567	Matthew, R. and Sen, N.	2008	2000-09	Amphibian	Frogs	2	Yes	No	Yes	No	Yes	2	1	0	0	0	1	0	0	0	0	Div	Rediscovery of Rhacophorus naso Annandale, 1912 (Amphibia: Anura: Rhacophoridae) from Mizoram, North East India	Records of the Zoological Survey of India	108(1)	41	Journal article
568	Gramapurohit, N.P., D.K. Veeranagoudar, Shanbhag, B.A. and Saidapur, S.K.	2004	2000-09	Amphibian	Frogs	4	No	Yes	No	Yes	Yes	1	0.25	0	0	0	0	0	1	0	0	Dev	Relative influence of kinship and density on metamorphic traits of Tomopterna breviceps	Journal of Herpetology	38(4)	594-599	Journal article
569	Shanbhag, B.A.	2003	2000-09	Reptile	Lizards	1	Yes	No	Yes	No	Yes	1	1	0	1	0	0	0	0	0	0	Ecol	Reproductive strategies in the lizard	Current Science	84(5)	646-652	Journal article
570	H. Joshy and M. Kuramoto	2001	2000-09	Amphibian	Frogs	2	No	Yes	No	Yes	No	0	0	0	0	0	0	0	1	0	0	Dev	Scanning electron microscopic studies on spermatozoa of anurans from India and Sri Lanka	Amphibia-Reptilia	22(3)	303-308	Journal article
571	Das, I. and Dutta, S.K.	2007	2000-09	Amphibian	Frogs	2	No	Yes	No	Yes	No	0	0	1	0	0	0	0	0	0	0	TX	Sources of larval identities for amphibians of India	Hamadryad	31(2)	152-300	Journal article
572	Gower, D.J. and Wilkinson, M.	2007	2000-09	Amphibian	Caecilians	2	No	Yes	No	Yes	No	0	0	1	0	0	0	0	0	0	0	TX	Species Groups in the Indian Caecilian Genus Uraeotyphlus Peters (Amphibia: Gymnophiona: Uraeotyphlidae), with the Description of a New Species	Herpetologica	63(3)	401-410	Journal article
573	Vasudevan, K., A. Kumar and Chellam, R.	2006	2000-09	Amphibian	Mixed	3	No	Yes	No	Yes	No	0	0	0	1	0	0	0	0	0	0	Ecol	Species turnover: the case of stream amphibians of rainforests in the Western Ghats, southern India	Biodiversity and Conservation	15(11)	3515-3525	Journal article
574	Singh, L.A.K. and Kar, S.K.	2006	2000-09	Reptile	Crocodile	2	No	Yes	No	Yes	No	0	0	0	0	0	0	1	0	0	0	Con	Status of the Saltwater Crocodile in Orissa: an Overview	Journal of the Bombay Natural History Society	103(2-3	274-285	Journal article
575	Matsui, M., Ito, H., Shimada, T., Ota, H., Saidapur, S.K., Khonsue, W., Tanaka-Ueno, T. and Guan-Fu, W.	2005	2000-09	Amphibian	Frogs	8	No	Yes	No	Yes	Yes	1	0.125	1	0	0	0	0	0	0	0	TX	Taxonomic relationships within the Pan-Oriental narrow-mouth toad Microhyla ornata as revealed by mtDNA analysis (Amphibia, Anura, Microhylidae)	Zoological Science	22	489-495	Journal article
576	Sengupta, S., Das, A., Das, S., Hussain, B., Choudhury, N.K. and Dutta, S.K.	2009	2000-09	Amphibian	Frogs	6	No	Yes	No	Yes	No	0	0	1	0	0	0	0	0	1	0	TXEvol	Taxonomy and Biogeography of Kaloula Species of Eastern India	The Natural History Journal of Chulalongkorn University	9(2)	209-222	Journal article
577	Hiragond, N.C. and Saidapur, S.K.	2000	2000-09	Amphibian	Frogs	2	No	Yes	No	Yes	No	0	0	0	0	0	0	0	1	0	0	Dev	The excurrent duct system of sperm transport in Rana cyanophlyctis, Rana limnocharis, Polypedates maculatus, Microhyla rubra, Bufo melanostictus and Bufo fergusonii.	Zoological Science	17(4)	453-458	Journal article
578	Radder, R.S., Saidapur, S.K., Shine, R. and Shanbhag, B.A.	2006	2000-09	Reptile	Lizards	4	No	Yes	Yes	No	Yes	1	0.25	0	1	1	0	0	0	0	0	EcolBH	The language of lizards: interpreting the function of visual displays of the Indian rock lizard, Psammophilus dorsalis (Agamidae)	Journal of Ethology	24	275-283	Journal article
579	Shanbhag, B.A., Karegouder, V.S. and Saidapur, S.K.	2000	2000-09	Reptile	Lizards	3	Yes	No	No	Yes	Yes	2	0.666667	0	0	0	0	0	1	0	0	Dev	The pattern of testicular activity in the gecko Hemidactylus brooki from India	Journal of Herpetology	34(4)	601-604	Journal article
580	Deuti, K. and Ayyaswamy, A.K.	2008	2000-09	Amphibian	Mixed	2	No	Yes	No	Yes	No	0	0	0	0	0	1	0	0	0	0	Div	Three New Records of Amphibians from West Bengal	Records of the Zoological Survey of India	108(4)	17-20	Journal article
581	Kamei, R.G., Wilkinson, M., Gower, D.J. and Biju, S.D.	2009	2000-09	Amphibian	Caecilians	4	Yes	No	No	Yes	Yes	1	0.25	1	0	0	0	0	0	0	0	TX	Three new species of striped Ichthyophis (Amphibia: Gymnophiona: Ichthyophiidae) from the northeast Indian states of Manipur and Nagaland	Zootaxa	2267	26-42	Journal article
582	Van Bocxlaer, I., Biju, S.D., Loader, S.P. and Bossuyt, F.	2009	2000-09	Amphibian	Frogs	4	Yes	No	No	Yes	Yes	1	0.25	0	0	0	0	0	0	1	0	Evol	Toad radiation reveals into-India dispersal as a source of endemism in the Western Ghats-Sri Lanka biodiversity hotspot	BMC evolutionary Biology	9(1)	131	Journal article
583	Biju, S.D. and Bossuyt, F.	2005	2000-09	Amphibian	Frogs	2	No	Yes	No	Yes	No	0	0	1	0	0	0	0	0	0	0	TX	Two New Philautus (Anura: Ranidae: Rhacophorinae) from Ponmudi Hill in the Western Ghats of India	Copeia	2005(1)	29-37	Journal article
584	Das, I. and Bauer, A.M.	2000	2000-09	Reptile	Lizards	2	No	Yes	No	Yes	No	0	0	1	0	0	0	0	0	0	0	TX	Two new species of Cnemaspis (Sauria: Gekkonidae) from Tamil Nadu, southern India	Russian Journal of Herpetology	7(1)	17-28	Journal article
585	Biju, S.D. and Bossuyt, F.	2006	2000-09	Amphibian	Frogs	2	No	Yes	No	Yes	No	0	0	1	0	0	0	0	0	0	0	TX	Two new species of Philautus (Anura, Ranidae, Rhacophorinae) from the Western Ghats, India	Amphibia-Reptilia	27(1)	2020-01-09	Journal article
586	Daniels, R.J.R.	2001	2000-09	Amphibian	Mixed	1	No	Yes	No	Yes	No	0	0	0	0	0	1	0	0	0	0	Div	Updated checklist of Indian amphibians	Cobra	46	2020-01-08	Journal article
587	Krishna, S. and Krishna, S.	2006	2000-09	Amphibian	Frogs	2	Yes	No	Yes	No	Yes	1	0.5	0	0	1	0	0	0	0	0	BH	Visual and acoustic communication in an endemic stream frog, Micrixalus saxicolus in the Western Ghats, India	Amphibia-Reptilia	27(1)	143-147	Journal article
588	Radder, R.S. and Shanbhag, B.A. and Saidapur, S.K.	2004	2000-09	Reptile	Lizards	3	No	Yes	Yes	No	Yes	1	0.333333	0	0	0	0	0	1	0	0	Dev	Yolk partitioning in embryos of the lizard, Calotes versicolor: Maximize body size or save energy for later use?	Journal of Experimental Zoology Part A: Comparative Experimental Biology	301(9)	783-785	Journal article
589	Gaitonde, N., Giri, V.B. and Kunte, K	2016	2010-19	Amphibian	Frogs	3	No	Yes	No	Yes	No	0	0	0	1	0	0	0	0	0	0	Ecol	‘On the rocks’: reproductive biology of the endemic toad Xanthophryne (Anura: Bufonidae) from the Western Ghats, India	Journal of Natural History	50(39-40)	2557-2572	Journal article
590	Subramanean, J. and Reddy, M.K.	2012	2010-19	Reptile	Lizards	2	No	Yes	No	Yes	No	0	0	0	1	0	0	0	0	0	0	Ecol	Diurnal Variation in Densities of Three Species of Lizards—Sitana ponticeriana, Calotes versicolor, and Eutropis bibronii in Relation to Temperature and Relative Humidity Across Different Seasons on Coramandel Coast Near Chennai (India)	Russian Journal of Herpetology	19(4)	277-283	Journal article
591	Dandge, P.H. and Tiple, A.D.	2015	2010-19	Reptile	Lizards	2	No	Yes	No	Yes	No	0	0	1	0	0	0	0	0	0	0	TX	A New Species of Rupicolus Gecko of the Genus Hemidactylus Oken, 1817 (Reptilia: Squamata: Gekkonidae) from Maharashtra, Central India	Russian Journal of Herpetology	22(3)	233-240	Journal article
592	Vyas, R. and Thakur, M.	2015	2010-19	Reptile	Snakes	2	No	Yes	No	Yes	No	0	0	0	0	0	0	0	0	0	1	OT	A case of albinism in Daboia russelii (Shaw & Nodder, 1797) from Gujarat, India	Sauria	37(1)	59-62	Journal article
593	Bhupathy, S., Ramesh Kumar, S., Paramanandham, J., Thirumalainathan, P. and Sarma, P.K.	2013	2010-19	Reptile	Mixed	5	No	Yes	No	Yes	No	0	0	0	0	0	1	0	0	0	0	Div	A conservation of reptiles in Nagaland, India	Bioresources and Traditional Knowledge of Northeast India	UK	181-186	Journal article
594	Das, A., Mohapatra, P.P., Purkayastha, J., Sengupta, S., Dutta, S.K., Ahmed, M.F. and Tillack, F.	2010	2010-19	Reptile	Snakes	7	No	Yes	No	Yes	No	0	0	1	0	0	1	0	0	0	0	TXDiv	A contribution to Boiga gokool (Gray, 1835)(Reptilia: Squamata: Colubridae)	Russian Journal of Herpetology	17(3)	161-178	Journal article
595	Sharma, V., Louies, J. and Vattam, A.	2013	2010-19	Reptile	Snakes	3	No	Yes	No	Yes	No	0	0	1	0	0	1	0	0	0	0	TXDiv	A contribution to Coluber bholanathi Sharma, 1976 (Serpentes: Colubridae)	Russian Journal of Herpetology	20(4)	259-263	Journal article
596	Mohapatra, P.P., Klaus-Dieter, S., Notker, H., Hofmann, S. and Dutta, S.K.	2016	2010-19	Reptile	Snakes	5	No	Yes	No	Yes	Yes	1	0.2	1	0	0	0	0	0	0	0	TX	A Contribution to the Indian Trinket Snake, Coelognathus helena (Daudin, 1803), with the Description of a New Subspecies.	Russian Journal of Herpetology	23(2)	115-144	Journal article
597	Das, S., Campbell, P.D., Deuti, K., Bag, P. and Raha, S.	2019	2010-19	Reptile	Lizards	5	No	Yes	No	Yes	No	0	0	1	0	0	0	0	0	0	0	TX	A contribution to the systematics of Salea anamallayana (Beddome, 1878) and S. horsfieldii Gray, 1845 (Squamata: Agamidae: Draconinae)	Zootaxa	4563(3)	563-583	Journal article
598	Zachariah, A., Abraham, R.K., Das, S., Jayan, K.C. and Altig, R.	2012	2010-19	Amphibian	Frogs	5	No	Yes	No	Yes	No	0	0	0	0	1	0		1	0	0	BHDev	A detailed account of the reproductive strategy and developmental stages of Nasikabatrachus sahyadrensis (Anura: Nasikabatrachidae), the only extant member of an archaic frog lineage.	Zootaxa	3510	53-64	Journal article
599	Srikanthan, A.N., Swamy, P., Mohan, A.V. and Pal, S.	2018	2010-19	Herpetofauna	Mixed	4	No	Yes	No	Yes	Yes	2	0.5	1	0	0	0	0	0	0	0	TX	A distinct new species of riparian rock-dwelling gecko (genus: Hemidactylus) from the southern Western Ghats	Zootaxa	4434(1)	141-157	Journal article
600	Javed, S.M.M., Mirza Z.A., Srinivasulu, C., Lakshmi Rao, K., Raseswari, T. and Tampal, F.	2011	2010-19	Reptile	Lizards	5	No	Yes	Yes	Yes	Yes	3	0.2	1	0	0	0	0	0	0	0	TX	A divergent population of Hemidactylus maculatus maculatus Duméril et Bibron, 1836 (Reptilia: Sauria: Gekkonidae) from the northern Eastern Ghats, India	Russian Journal of Herpetology	18(1)	7-16	Journal article
601	Biju, S.D., Shouche, Y., Dubois, A., Dutta, S.K. and Bossuyt, F.	2010	2010-19	Amphibian	Frogs	5	No	Yes	No	Yes	No	0	0	1	0	0	0	0	0	0	0	TX	A ground-dwelling rhacophorid frog from the highest mountain peak of the Western Ghats of India	Current Science	98(8)	1119-1125	Journal article
602	Datta-Roy, A., Mohapatra, P.P., Dutta, S.K., Giri, V.B., Deepak, V., Maddock, S.T., Raj, P., Agarwal, I. and Karanth. P.K.	2013	2010-19	Reptile	Lizards	9	No	Yes	No	Yes	No	0	0	1	1	0	1	0	0	0	0	TXEcolDiv	A long-lost relic from the Eastern Ghats: Morphology, distribution and habitat of Sepsophis punctatus Beddome, 1870 (Squamata: Scincidae)	Zootaxa	3670(1)	55-62	Journal article
603	Batabyal, A., Balakrishna, S. and Thaker, M.	2017	2010-19	Reptile	Lizards	3	Yes	No	Yes	No	Yes	2	0.666667	0	0	1	0	0	0	0	0	BH	A multivariate approach to understanding shifts in escape strategies of urban lizards	Behavioral Ecology and Sociobiology	71	83	Journal article
604	Vijayakumar, S.P., Pyron, R.A., Dinesh, K.P., Torsekar, V.R., Srikanthan, A.N., Swamy, P., Stanley, E. L., Blackburn, D.C. and Shanker, K.	2019	2010-19	Amphibian	Frogs	9	No	Yes	No	Yes	Yes	1	0.111111	1	0	0	0	0	0	1	0	TXEvol	A new ancient lineage of frog (Anura: Nyctibatrachidae: Astrobatrachinae subfam. nov.) endemic to the Western Ghats of Peninsular India	Peer J	7	e6457	Journal article
605	Agarwal, I., Khandekar, A. and Bauer, A.M.	2018	2010-19	Reptile	Lizards	3	No	Yes	No	Yes	No	0	0	1	0	0	0	0	0	0	0	TX	A new bent-toed gecko (Squamata: Gekkonidae: Cyrtodactylus) from the Western Himalayas, Himachal Pradesh, India	Zootaxa	4446	442-454	Journal article
606	Raveendran, D.K., Deepak, V., Smith, E.N. and Smart, U.	2017	2010-19	Reptile	Snakes	4	No	Yes	No	Yes	No	0	0	0	0	0	0	0	0	1	0	Evol	A new colour morph of Calliophis bibroni (Squamata: Elapidae) and evidence for Müllerian mimicry in Tropical Indian Coralsnakes	Herpetology Notes	10	209-217	Journal article
607	Agarwal, I., Giri, V.B. and Bauer, A.M.	2011	2010-19	Reptile	Lizards	3	No	Yes	No	Yes	No	0	0	1	0	0	0	0	0	0	0	TX	A new cryptic rock-dwelling Hemidactylus (Squamata: Gekkonidae) from south India	Zootaxa	2765	21-37	Journal article
608	Mirza, Z.A. and Sanap, R.	2014	2010-19	Reptile	Lizards	2	No	Yes	No	Yes	No	0	0	1	0	0	0	0	0	0	0	TX	A new cryptic species of gecko of the genus Hemidactylus Oken, 1817 (Reptilia: Gekkonidae) from Southern India	Taprobanica: The Journal of Asian Biodiversity	6(1)	12-20	Journal article
609	Mirza, Z.A.	2018	2010-19	Reptile	Lizards	1	No	Yes	No	Yes	No	0	0	1	0	0	0	0	0	0	0	TX	A new cryptic species of ground-dwelling Hemidactylus (Squamata: Gekkonidae) from southern India	Phyllomedusa: Journal of Herpetology	17	169-180	Journal article
610	Chaitanya, R., Lajmi, A. and Giri, V.B.	2018	2010-19	Reptile	Lizards	3	No	Yes	No	Yes	Yes	1	0.333333	1	0	0	0	0	0	0	0	TX	A new cryptic, rupicolous species of Hemidactylus Oken, 1817 (Squamata: Gekkonidae) from Meghamalai, Tamil Nadu, India	Zootaxa	4374	49-70	Journal article
611	Deuti, K., Murthy, B.H.C.K. and Sethy, P.G.S.	2018	2010-19	Amphibian	Frogs	3	No	Yes	No	Yes	No	0	0	0	0	1	1	0	1	0	0	BHDivDev	A new distribution record of Polypedates taeniatus (Amphibia: Anura: Rhacophoridae) with notes on its Breeding Call and Post-Embryonic developmental stages.	Records of the Zoological Survey of India	118(3)	298-306	Journal article
612	Chandramouli, S.R., Vasudevan, K., Harikrishnan, S., Dutta, S.K., Janani, S.J., Sharma, R., Das, I. and Aggarwal, R.	2016	2010-19	Amphibian	Frogs	8	No	Yes	No	Yes	Yes	2	0.25	1	0	0	0	0	0	0	0	TX	A new genus and species of arboreal toad with phytotelmonous larvae, from the Andaman Islands, India (Lissamphibia, Anura, Bufonidae)	ZooKeys	555	57	Journal article
613	Giri, V.B., Gower, D.J., Das, A., Lalremsanga, H.T., Lalronunga, S., Captain, A. and Deepak, V.	2019	2010-19	Reptile	Snakes	7	No	Yes	No	Yes	No	0	0	1	0	0	0	0	0	0	0	TX	A new genus and species of natricine snake from northeast India	Zootaxa	4603(2)	241-264	Journal article
614	Mirza, Z.A., Bhosale, H. and Patil, R.	2017	2010-19	Reptile	Lizards	3	No	Yes	No	Yes	No	0	0	1	0	0	0	0	0	0	0	TX	A new large species of gecko of the genus Hemidactylus Oken, 1817 (Reptilia: Sauria: Gekkonidae) from the Eastern Ghats, India	Comptes Rendus Biologies	340	531-540	Journal article
615	Kalaimani, A. and Nath, A.	2012	2010-19	Reptile	Lizards	2	No	Yes	No	Yes	No	0	0	0	1	0	1	0	0	0	0	EcolDiv	A new locality and microhabitat usage by Calodactylodes aureus (Beddome, 1870) from Tamil Nadu, Eastern Ghats, Southern India	Herpetotropicos: Tropical Amphibians & Reptiles	8	49-54	Journal article
616	Ingle, M. and Sarsavan, A.	2011	2010-19	Reptile	Snakes	2	No	Yes	No	Yes	No	0	0	0	0	0	1	0	0	0	0	Div	A new locality record of Coronella brachyura (Günther 1866)(Serpentes, Colubridae, Colubrinae) from Madhya Pradesh, India, with notes on its distribution and natural history	Sauria	33(2)	59-61	Journal article
617	Mahony, S., Sengupta, S., Kamei, R.G. and Biju, S.D.	2011	2010-19	Amphibian	Frogs	4	No	Yes	No	Yes	Yes	1	0.25	1	0	0	0	0	0	0	0	TX	A new low altitude species of Megophrys Kuhl and van Hasselt (Amphibia: Megophryidae), from Assam, Northeast India	Zootaxa	3059	36-46	Journal article
618	Biju, S.D., Garg, S., Kamei, R.G. and Maheswaran, G.	2019	2010-19	Amphibian	Frogs	4	No	Yes	No	Yes	Yes	2	0.5	1	0	0	0	0	0	0	0	TX	A new Microhyla species (Anura: Microhylidae) from riparian evergreen forest in the eastern Himalayan state of Arunachal Pradesh, India	Zootaxa	4674(1)	100-116	Journal article
619	Mirza, Z.A., Vyas, R., Patel, H., Maheta, J. and Sanap, R.V.	2016	2010-19	Reptile	Snakes	5	No	Yes	No	Yes	No	0	0	1	0	0	0	0	0	1	0	TXEvol	A new miocene-divergent lineage of old world racer snake from India	PLoS ONE	11(3)	e0148380	Journal article
620	Sheth, C. and Zambre, A.	2012	2010-19	Reptile	Snakes	2	No	Yes	No	Yes	No	0	0	0	0	0	1	0	0	0	0	Div	A new Record of Boiga gokool (GRAY, 1835) (Reptilia: Colubridae) from western Arunachal Pradesh, India	Sauria	34(3)	51-54	Journal article
621	Kundu, S., Das, K.C., Lalremsanga, H.T., Gupta, A. and Ghosh, S.K.	2013	2010-19	Reptile	Chelonians	5	No	Yes	No	Yes	No	0	0	0	0	0	1	0	0	0	0	Div	A new report for all representatives of Asian Forest Tortoise has their footmarks in northeast India	Bioresources and Traditional Knowledge of Northeast India	UK	241-245	Journal article
622	Murthy, B.H., Bauer, A.M., Lajmi, A., Agarwal, I. and Giri, V.B.	2015	2010-19	Reptile	Lizards	5	No	Yes	No	Yes	Yes	1	0.2	1	0	0	0	0	0	0	0	TX	A new rock dwelling Hemidactylus (Squamata: Gekkonidae) from Chhattisgarh, India.	Zootaxa	4021	334-350	Journal article
623	Mirza, Z.A. and Raju, D.	2017	2010-19	Reptile	Lizards	2	No	Yes	No	Yes	No	0	0	1	0	0	0	0	0	0	0	TX	A new rupicolous species of gecko of the genus Hemidactylus Oken, 1817 from the Satpura Hills, Central India	Amphibian & Reptile Conservation	11	51-71	Journal article
624	Deepak V., Narayanan, S., Sarkar, V., Dutta S.K. and Mohapatra, P.P.	2019	2010-19	Reptile	Snakes	5	No	Yes	No	Yes	No	0	0	1	0	0	0	0	0	0	0	TX	A new species of Ahaetulla Link, 1807 (Serpentes: Colubridae: Ahaetullinae) from India	Journal of Natural History	53(9-10)	497-516	Journal article
625	Giri, V.B., Deepak, V., Captain, A., Pawar, S. and Tillack, F.	2019	2010-19	Reptile	Snakes	5	No	Yes	No	Yes	No	0	0	1	0	0	0	0	0	0	0	TX	A New Species of Boiga Fitzinger, 1826 (Serpentes: Colubridae) from The Northern Western Ghats of India	Journal of the Bombay Natural History Society	116	2020-11-01	Journal article
626	Smith, E.N., Ogale, H., Deepak, V., and Giri, V.B.	2012	2010-19	Reptile	Snakes	4	No	Yes	No	Yes	No	0	0	1	0	0	0	0	0	0	0	TX	A new species of coralsnake of the genus Calliophis (Squamata: Elapidae) from the west coast of peninsular India	Zootaxa	3437(1)	51-68	Journal article
627	Harikrishnan, S., Vasudevan, K., Chandramouli, S.R. and Das, I.	2012	2010-19	Reptile	Lizards	4	No	Yes	No	Yes	No	0	0	1	0	0	0	0	0	0	0	TX	A new species of Coryphophylax Fitzinger in: Steindachner, 1867 (Sauria: Iguania: Agamidae) from the Andaman Islands, India	Zootaxa	3451	31-45	Journal article
628	Murthy, B.H.C., Nitesh, A., Sengupta, S. and Deepak, P.	2019	2010-19	Herpetofauna	Mixed	4	No	Yes	No	Yes	Yes	1	0.25	1	0	0	0	0	0	0	0	TX	A new species of Day Gecko of the genus Cnemaspis Strauch, 1887 (Squamata: Gekkonidae) from the Nilgiri Hills, Tamil Nadu, India	Records of the Zoological Survey of India	119(3)	211-226	Journal article
629	Das, A., Chetia, M., Dutta, S.K. and Sengupta, S.	2013	2010-19	Amphibian	Frogs	4	No	Yes	No	Yes	Yes	1	0.25	1	0	0	0	0	0	0	0	TX	A new species of Duttaphrynus (Anura: Bufonidae) from Northeast India	Zootaxa	3646(4)	336-348	Journal article
630	Priti, H., Naik, C.R., Seshadri, K.S., Singal, R., Vidisha, M.K., Ravikanth, G. and Gururaja, K.V.	2016	2010-19	Amphibian	Frogs	7	Yes	No	No	Yes	Yes	2	0.285714	1	0	0	0	0	0	0	0	TX	A New Species of Euphlyctis (Amphibia, Anura, Dicroglossidae) from the West Coastal Plains of India	Asian Herpetological Research	7	229-241	Journal article
631	Bhosale, H.S., Gowande, G.G. and Mirza, Z.A.	2019	2010-19	Reptile	Snakes	3	No	Yes	No	Yes	No	0	0	1	0	0	0	0	0	0	0	TX	A new species of fossorial natricid snakes of the genus Trachischium Günther, 1858 (Serpentes: Natricidae) from the Himalayas of northeastern India	Comptes rendus biologies	342(9-10)	323-329	Journal article
632	Mirza, Z.A., Pal, S., Bhosale, H.S., Sanap, R.V.	2014	2010-19	Reptile	Lizards	4	No	Yes	No	Yes	No	0	0	1	0	0	0	0	0	0	0	TX	A new species of gecko of the genus Cnemaspis Strauch, 1887 from the Western Ghats, India	Zootaxa	3815(4)	494-506	Journal article
633	Sengupta, S., Sailo, S., Lalremsanga, H.T., Das, A. and Das, I.	2010	2010-19	Amphibian	Frogs	5	No	Yes	No	Yes	Yes	1	0.2	1	0	0	0	0	0	0	0	TX	A new species of Leptolalax (Anura: Megophryidae) from Mizoram, north-eastern India	Zootaxa	2406(1)	57-68	Journal article
634	Das, I., Tron, R.K.L., Rangad, D. and Hooroo, R.N.K.	2010	2010-19	Amphibian	Frogs	4	No	Yes	No	Yes	Yes	1	0.25	1	0	0	0	0	0	0	0	TX	A new species of Leptolalax (Anura: Megophryidae) from the sacred groves of Mawphlang, Meghalaya, north-eastern India	Zootaxa	2339(1)	44-56	Journal article
635	Mirza, Z.A., Sanap, R.V., Raju, D., Gawai, A. and Ghadekar, P.	2014	2010-19	Reptile	Lizards	5	No	Yes	No	Yes	No	0	0	1	0	0	0	0	0	0	0	TX	A new species of lizard of the genus Eublepharis (Squamata: Eublepharidae) from India	Phyllomedusa: Journal of Herpetology	13(2)	75-90	Journal article
636	Das, A., Garg, S., Hamidy, A., Smith, E.N. and Biju, S.D.	2019	2010-19	Amphibian	Frogs	5	Yes	Yes	No	Yes	Yes	1	0.2	1	0	0	0	0	0	0	0	TX	A new species of Micryletta frog (Microhylidae) from Northeast India	Peer J	7	e7012	Journal article
637	Captain, A., Deepak, V., Pandit, R., Bhatt, B.B. and Athreya, R.	2019	2010-19	Reptile	Snakes	5	No	Yes	No	Yes	No	0	0	1	0	0	0	0	0	0	0	TX	A New Species of Pitviper (Serpentes: Viperidae: Trimeresurus lacepède, 1804) from West Kameng District, Arunachal Pradesh, India.	Russian Journal of Herpetology	26(2)	111-122	Journal article
638	Chudhury, B. and Das, I.	2019	2010-19	Amphibian	Frogs	2	No	Yes	No	Yes	No	0	0	1	0	0	0	0	0	0	0	TX	A new species of Polypedates Tschudi, 1838 (Amphibia: Anura: Rhacophoridae) from West Bengal State, Eastern India	Zootaxa	4691(5)	525-540	Journal article
639	Seshadri, K.S., Gururaja, K.V. and Aravind, N.A.	2012	2010-19	Amphibian	Frogs	3	No	Yes	No	Yes	No	0	0	1	0	0	0	0	0	0	0	TX	A new species of Raorchestes (Amphibia: Anura: Rhacophoridae) from mid-elevation evergreen forests of the southern Western Ghats, India	Zootaxa	3410	19-34	Journal article
640	Giri, V.B., Deepak, V., Captain, A., Das, A., Das, S., Rajkumar, K.P., Rathish, R.L. and Gower, D.J.	2017	2010-19	Reptile	Snakes	8	No	Yes	No	Yes	No	0	0	1	0	0	0	0	0	0	0	TX	A new species of Rhabdops Boulenger, 1893 (Serpentes: Natricinae) from the northern Western Ghats region of India	Zootaxa	4319(1)	27-52	Journal article
641	Khandekar, A.	2019	2010-19	Reptile	Snakes	1	No	Yes	No	Yes	No	0	0	1	0	0	0	0	0	0	0	TX	A new species of rock-dwelling Cnemaspis Strauch, 1887 (Squamata: Gekkonidae) from Tamil Nadu, southern India	Zootaxa	4571(3)	383-397	Journal article
642	Prasad, V.K., Dinesh, K.P., Das, A., Swamy, P., Shinde, A.D. and Vishnu, J.P.	2019	2010-19	Amphibian	Frogs	7	No	Yes	No	Yes	Yes	1	0.14	1	0	0	0	0	0	0	0	TX	A New Species of Sphaerotheca Gunther, 1859 (Amphibia: Anura: Dicroglossidae) from the Agro Ecosystems of Chota Nagpur Plateau, India	Records of the Zoological Survey of India	94	197-210	Journal article
643	Agarwal, I., Mirza Z.A., Pal, S., Maddock, S.T., Mishra, A. and Bauer, A.M.	2016	2010-19	Reptile	Lizards	6	No	Yes	No	Yes	No	0	0	1	0	0	0	0	0	0	0	TX	A new species of the Cyrtodactylus (Geckoella) collegalensis (Beddome, 1870) complex (Squamata: Gekkonidae) from Western India	Zootaxa	4170	339-354	Journal article
644	Pan, H., Chettri, B., Yang, D., Jiang, K., Wang, K., Zhang, L., and Vogel, G.	2013	2010-19	Reptile	Snakes	7	Yes	Yes	No	Yes	Yes	1	0.143	1	0	0	0	0	0	0	0	TX	A new species of the genus Protobothrops (Squamata: Viperidae) from southern Tibet, China and Sikkim, India	Asian Herpetological Research	4(2)	109-115	Journal article
645	Khatiwada, J.R., Wang, B., Ghimire, S., Vasudevan, K., Paudel, S. and Jiang, J.	2015	2010-19	Amphibian	Salamander	5	No	Yes	No	Yes	No	0	0	1	0	0	0	0	0	0	0	TX	A new species of the genus Tylototriton (Amphibia: Urodela: Salamandridae) from eastern Himalaya	Asian Herpetological Research	6(4)	245-256	Journal article
646	Jins, V.J., Sampaio, F.L. and Gower, D.J.	2018	2010-19	Reptile	Snakes	3	No	Yes	No	Yes	Yes	1	0.33	1	0	0	0	0	0	0	0	TX	A new species of Uropeltis Cuvier, 1829 (Serpentes: Uropeltidae) from the Anaikatty Hills of the Western Ghats of India.	Zootaxa	4415(3)	401-422	Journal article
647	Mallik, S., Parida, S.P., Mohanty, A.K., Mallik, A., Purohit, K.L., Mohanty, S., Nanda, S., Sindura, S., Purohit, S., Mishra, A.T. and Sahoo, S.	2014	2010-19	Reptile	Snakes	11	No	Yes	No	Yes	Yes	4	0.36	1	0	0	0	0	0	0	0	TX	A New Species of Wolf Snake (Serpentes: Colubridae: Lycodon) from Berhampur, Ganjam, Odisha, India.	Russian Journal of Herpetology	21(3)	205-216	Journal article
648	Khan, A., Rangasamy, V.R., Lalremsanga, H.T., Biakzuala, Lal, Sailo, J. and Charlton, T	2019	2010-19	Reptile	Lizards	6	No	Yes	No	Yes	Yes	1	0.166667	0	0	0	1	0	0	0	0	Div	A new state record of the Mandarin Rat Snake Euprepiophis mandarinus (Cantor, 1842)(Squamata: Colubridae: Coronellini) from Mizoram, India	Aphibian & Reptile Conservation	13	230-234	Journal article
649	Deepak, V., Ruane, S. and Gower, D.J.	2018	2010-19	Reptile	Snakes	3	No	Yes	No	Yes	Yes	1	0.33	1	0	0	0	0	0	0	0	TX	A new subfamily of fossorial colubroid snakes from the Western Ghats of peninsular India	Journal of Natural History	52(45-46)	2919-2934	Journal article
650	Chaitanya, R., Agarwal, I., Lajmi, A., Khandekar, A.	2019	2010-19	Reptile	Lizards	4	No	Yes	No	Yes	Yes	1	0.25	1	0	0	0	0	0	0	0	TX	A Novel Member of the Hemidactylus Brookii Complex (Squamata: Gekkonidae) From the Western Ghats of Maharashtra, India	Zootaxa	4646	236-250	Journal article
651	Veeranagoudar, D.K., Bhagyashri A.S. and Saidapur, S.K.	2010	2010-19	Reptile	Lizards	3	No	Yes	No	Yes	Yes	1	0.333333	0	0	1	0	0	0	0	0	BH	A novel thermoregulatory behaviour in a gravid rock lizard, Psammophilus dorsalis	Herpetology Notes	3	101-103	Journal article
652	Abraham, R.K., Mathew, J.K., Cyriac, V.P., Zachariah, A., Raju, D.V., and Zachariah, A.	2015	2010-19	Amphibian	Frogs	5	No	Yes	No	Yes	No	0	0	1	0	0	0	0	0	0	0	TX	A novel third species of the Western Ghats endemic genus Ghatixalus (Anura: Rhacophoridae), with description of its tadpole	Zootaxa	4048(1)	101-113	Journal article
653	Agarwal, I. and Ramakrishnan, U.	2017	2010-19	Reptile	Lizards	2	No	Yes	No	Yes	Yes	1	0.5	0	0	0	0	0	0	1	0	Evol	A phylogeny of open‐habitat lizards (Squamata: Lacertidae: Ophisops) supports the antiquity of Indian grassy biomes	Journal of Biogeography	44	2021-2032	Journal article
654	Agarwal, I. and Karanth, P.	2015	2010-19	Reptile	Lizards	2	No	Yes	No	Yes	No	0	0	0	0	0	0	0	0	1	0	Evol	A phylogeny of the only ground-dwelling radiation of Cyrtodactylus (Squamata, Gekkonidae): diversification of Geckoella across peninsular India and Sri Lanka	Molecular Phylogenetics and Evolution	82	193-199	Journal article
655	Agarwal, I., Mistry, V.K. and Athreya, R.	2010	2010-19	Reptile	Mixed	3	No	Yes	No	Yes	No	0	0	0	0	0	1	0	0	0	0	Div	A preliminary checklist of the reptiles of Eaglenest Wildlife Sanctuary, West Kameng District, Arunachal Pradesh, India	Russian Journal of Herpetology	17(2)	81-93	Journal article
656	Wagh, G.A., Rawankar, A.S., Sharma, V. and Wadatkar, J.S.	2017	2010-19	Amphibian	Mixed	4	No	Yes	No	Yes	No	0	0	0	0	0	1	0	0	0	0	Div	A preliminary study on the amphibian diversity in different habitats of Amravati district, Maharashtra	Journal of Entomology and Zoology Studies	5(1)	158-162	Journal article
657	Sharma, S.K. and Koli, V.K.	2014	2010-19	Reptile	Snakes	2	No	Yes	No	Yes	No	0	0	0	0	0	0	0	0	0	1	OT	A preliminary study on the tongue colouration of some Indian snakes and monitor lizard	Cobra	8(1)	26-28	Journal article
658	Jadesh, M. Kamble, P., Manjunath, K., Ravikiran, K. and Padashetty, S.	2014	2010-19	Herpetofauna	Mixed	4	No	Yes	No	Yes	No	0	0	0	0	0	1	0	0	0	0	Div	A preliminary survey of amphibians and reptiles in around Gulbarga University Campus, Karnataka, India	International Letters of Natural Sciences	22	67-71	Journal article
659	Ganesh, S.R. and Aengals, R.	2011	2010-19	Reptile	Lizards	2	No	Yes	No	Yes	No	0	0	1	0	0	0	0	0	0	0	TX?	A reappraisal of Salea horsfieldii Gray, 1845 (Reptilia: Agamidae) in the Palni Hills of the Western Ghats, Southern India	Sauria	33(3)	53-56	Journal article
660	Abraham, R.K., Zachariah, A. and Cyriac, V.P.	2015	2010-19	Amphibian	Frogs	3	No	Yes	No	Yes	No	0	0	1	0	0	0	0	0	0	0	TX	A reappraisal of the rhacophorid bush frog Raorchestes flaviventris (Boulenger, 1882), with an evaluation of the taxonomic status of R. emeraldi Vijayakumar, Dinesh, Prabhu and Shankar, 2014	Zootaxa	4048 (1)	90-100	Journal article
661	Purkayastha, J., Kalita, J., Brahma, R.K., Doley, R. and Das, M.	2018	2010-19	Reptile	Snakes	5	No	Yes	No	Yes	Yes	1	0.2	1	0	0	0	0	0	0	0	TX	A review of the relationships of Xenochrophis cerasogaster Cantor, 1839 (Serpentes: Colubridae) to its congeners	Zootaxa	4514(1)	126-136	Journal article
662	Rooijen, J.V. and Vogel, G.	2012	2010-19	Herpetofauna	Mixed	2	No	Yes	No	Yes	No	0	0	1	0	0	0	0	0	0	0	TX	A revision of the taxonomy of Dendrelaphis caudolineatus (Gray, 1834)(Serpentes: Colubridae)	Zootaxa	3272	1-25	Journal article
663	Saikia, B., Sinha, B. and Kharkongor, I.J.	2017	2010-19	Amphibian	Frogs	3	No	Yes	No	Yes	Yes	1	0.33	0	0	0	1	0	0	0	0	Div	A second record of the Eastern Spadefoot Toad (Amphibia: Anura: Megophryidae: Leptobrachium bompu Sondhi & Ohler, 2011) with a note on its morphological variations and natural history	Journal of Threatened Taxa	9(9)	10692-10696	Journal article
664	Vogel, G., Lalremsanga, H.T., Vanlalhrima, V.	2017	2010-19	Reptile	Snakes	3	No	Yes	No	Yes	No	0	0	1	0	0	0	0	0	0	0	TX	A second species of the genus Blythia Theobald, 1868 (Squamata: Colubridae) from Mizoram, India	Zootaxa	4276(4)	569-581	Journal article
665	Ohler, A., Borah, M.M., Das, M.K., Tesia, C. and Bordoloi, S.	2018	2010-19	Amphibian	Mixed	5	Yes	No	Yes	No	Yes	5	1	0	0	0	1	0	0	0	0	Div	A study on amphibian fauna of Arunachal Pradesh (India)	Alytes	36(1-4)	276-288	Journal article
666	Bansode, S.A., More, V.R. and Mirza, K.A.	2016	2010-19	Reptile	Snakes	3	Yes	No	Yes	No	Yes	1	0.33	0	0	0	1	0	0	0	0	Div	A Study on snakes from Mokhada and Jawhar (Dist. Palghar) Maharashtra, India	International Journal of Fauna and Biological Studies	3(5)	103-115	Journal article
667	Harikrishnan, S., Chandramouli, S. and Vasudevan, K.	2012	2010-19	Herpetofauna	Mixed	3	No	Yes	No	Yes	No	0	0	0	0	0	1	0	0	0	0	Div	A survey of herpetofauna on Long Island, Andaman and Nicobar Islands, India	Herpetological Bulletin	119	19-28	Journal article
668	Pal, S., Vijayakumar S.P., Shanker K., Jayarajan, A. and Deepak, V.	2018	2010-19	Reptile	Lizards	5	No	Yes	No	Yes	Yes	1	0.2	1	0	0	0	0	0	0	0	TX	A systematic revision of Calotes Cuvier, 1817 (Squamata: Agamidae) from the Western Ghats adds two genera and reveals two new species	Zootaxa	4482	401-450	Journal article
669	Deepak, V., Vyas, R., Giri, V.B. and Karanth, P.	2015	2010-19	Reptile	Lizards	4	No	Yes	No	Yes	No	0	0	1	0	0	0	0	0	0	0	TX	A taxonomic mystery for more than 180 years: the identity and systematic position of Brachysaura minor (Hardwicke & Gray, 1827)	Vertebrate Zoology	65(3)	371-381	Journal article
670	Biju, S.D., Bocxlaer,I.V., Mahony. S., Dinesh, K.P., Radhakrishnan, C., Zachariah, A., Giri, V. and Bossuyt, F.	2011	2010-19	Amphibian	Frogs	7	No	Yes	No	Yes	Yes	1	0.142857	1	0	0	0	0	0	0	0	TX	A taxonomic review of the Night Frog genus Nyctibatrachus Boulenger, 1882 in the Western Ghats, India (Anura: Nyctibatrachidae) with description of twelve new species.	Zootaxa	3029	1-96	Journal article
671	Willaert, B., Suyesh, R., Garg, S., Giri, V.B., Bee, M.A. and Biju, S.D.	2016	2010-19	Amphibian	Frogs	6	No	Yes	No	Yes	Yes	1	0.166667	0	0	1	0	0	0	0	0	BH	A unique mating strategy without physical contact during fertilization in Bombay Night Frogs (Nyctibatrachus humayuni) with the description of a new form of amplexus and female call.	PeerJ	4	e2117	Journal article
672	Ammanna, V.H.F., Saidapur, S.K and Shanbhag, B.A.	2013	2010-19	Reptile	Lizards	3	Yes	No	Yes	No	Yes	2	0.67	0	0	1	0	0	0	0	0	BH	Absence of kin discrimination in the hatchlings of a lizard, Calotes versicolor (Agamidae)	Animal Biology	63(1)	47-58	Journal article
673	Das, A., Sharma, P., Harikrishnan, S., Nath, A., Ghosh, S., Dutta, S., Mondol, J. and Wangdi, Y.	2016	2010-19	Herpetofauna	Mixed	8	No	Yes	No	Yes	Yes	2	0.25	0	0	0	1	0	0	0	0	Div	Addition to the herpetofauna of Royal Manas National Park, Bhutan, with six new country records	Herpetology Notes	9	261-278	Journal article
674	Mohapatra, P.P., Dutta, S.K., Niladri, B.K, Das, A., Murthy, B.H.C.K. and Deepak, V.	2017	2010-19	Reptile	Snakes	7	No	Yes	No	Yes	No	0	0	1	0	0	0	0	0	0	0	TX	Ahaetulla nasuta anomala (Annandale, 1906)(Squamata: Colubridae), resurrected as a valid species with marked sexual dichromatism	Zootaxa	4263(2)	318-332	Journal article
675	Borkin, L.J., Litvinchuk, S.N., Melnikov, D.A. and Skorinov, D.	2018	2010-19	Reptile	Lizards	4	No	Yes	No	Yes	No	0	0	0	0	0	1	0	0	0	0	Div	Altitudinal distribution of skinks of the genus Asymblepharus in the Western Himalaya, India(Reptilia: Sauria: Scincidae)	Biodiversity and Natural Heritage of the Himalaya	6	163-167	Journal article
676	Saikia, B., Imam, I., Kharkongor, I.J, Meitei, L.R.	2018	2010-19	Amphibian	Mixed	4	No	Yes	No	Yes	Yes	1	0.25	0	0	0	1	0	0	0	0	Div	Amphibian Diversity at BSI Experimental Botanic Garden, Umiam, Meghalaya, India	Bulletin of Arunachal Forest Research	33(1)	5-9	Journal article
677	Sengupta, S., Hussain, B., Gogoi, J., Choudhury, R.K., Kalita, J. and Baruah, B.K.	2010	2010-19	Amphibian	Mixed	6	No	Yes	No	Yes	No	0	0	0	0	0	1	0	0	0	0	Div	Amphibians of some protected landscape of Assam, Northeastern India	Hamadryad	35(1)	28-36	Journal article
678	Harikrishnan, S. and Vasudevan, K.	2018	2010-19	Amphibian	Mixed	2	No	Yes	No	Yes	No	0	0	0	0	0	1	0	0	0	0	Div	Amphibians of the Andaman & Nicobar Islands: distribution, natural history, and notes on taxonomy	Alytes	36	1-4	Journal article
679	Roy, J.K., Begum, R.H. and Ahmed, M.F.	2018	2010-19	Amphibian	Mixed	3	No	Yes	No	Yes	Yes	1	0.33	0	0	0	1	0	0	0	0	Div	Amphibians of the Dibang River Basin, Arunachal Pradesh: An annotated checklist with distribution records	Journal of Threatened Taxa	10(15)	12940-12952	Journal article
680	Deuti, K., Ray, S., Bag, P. and Dey, S.K.	2017	2010-19	Amphibian	Mixed	4	No	Yes	No	Yes	No	0	0	0	0	0	1	0	0	0	0	Div	Amphibians of the Duars Area of Northern West Bengal	Records of the Zoological Survey of India	117(3)	221-241	Journal article
681	Subba, B., Aravind, N.A. and Ravikanth, G.	2017	2010-19	Amphibian	Mixed	3	Yes	No	Yes	No	Yes	1	0.33	0	0	0	1	0	0	0	0	Div	Amphibians of the Sikkim Himalaya, India: an annotated checklist	Checklist	13(1)	2033	Journal article
682	Sutradhar, S. and Nath, A.	2013	2010-19	Reptile	Snakes	2	No	Yes	No	Yes	No	0	0	0	0	0	1	0	0	0	0	Div	An Account on Poorly Known Corral Red Snake Oligodon kheriensis Acharji et Ray, 1936 from Assam, India	Russian Journal of Herpetology	20(4)	247-252	Journal article
683	Datta-Roy, A., Deepak, V., Sidharthan, C., Barley, A.J. and Karanth, P.	2015	2010-19	Reptile	Lizards	5	No	Yes	No	Yes	Yes	1	0.2	1	0	0	0	0	0	0	0	TX	An addition to the endemic Indian radiation of Eutropis: Phylogenetic position of Eutropis dissimilis Hallowell (Squamata: Scincidae)	Zootaxa	4027	145-150	Journal article
684	Manhas, A., Raina, R. and Wanganeo, A.	2016	2010-19	Herpetofauna	Mixed	3	No	Yes	No	Yes	Yes	1	0.33	0	0	0	1	0	0	0	0	Div	An addition to the reptilian diversity of Barkatullah University campus, Bhopal, Madhya Pradesh, India	International Journal of Pure and Applied Zoology	4(4)	306-309	Journal article
685	Prasad, V.K., Verma, A. and Shahabuddin, G.	2018	2010-19	Herpetofauna	Mixed	3	No	Yes	No	Yes	Yes	1	0.33	0	0	0	1	0	0	0	0	Div	An annotated checklist of the herpetofauna of the Rashtrapati Bhawan Estates, New Delhi, India	Journal of Threatened Taxa	10(2)	1295-11302	Journal article
686	Manhas A.,Raina R., and Wanganeo A.	2016	2010-19	Herpetofauna	Mixed	3	No	Yes	No	Yes	Yes	1	0.33	0	0	0	1	0	0	0	0	Div	An assessment of reptilian diversity and their distribution in Jammu and Kashmir state from Jammu city in northern India: A case study	International Journal of Fauna and Biological Studies	3(3)	20-23	Journal article
687	Das, K.C. and Gupta, A.	2017	2010-19	Reptile	Chelonians	2	No	Yes	No	Yes	No	0	0	0	0	0	1	0	0	0	0	Div	An ecological note on the new record of Cuora amboinensis (Riche in Daudin, 1801)(Reptilia: Testudines: Geoemydidae) in northeastern India	Journal of Threatened Taxa	9(7)	10459-10462	Journal article
688	Banerjee, A.	2010	2010-19	Amphibian	Frogs	1	No	Yes	No	Yes	No	0	0	0	1	0	0	0	0	0	0	Ecol	An ecological study on Chiromantis simus (Anura: Rhacophoridae), with special reference to breeding behavior at Rajpur, eastern India	Hamadryad	35(1)	73-83	Journal article
689	Agarwal, I., Bauer, A.M., Giri, V.B. and Khandekar, A.	2019	2010-19	Reptile	Lizards	4	No	Yes	No	Yes	No	0	0	1	0	0	0	0	0	1	0	TXEvol	An expanded ND2 phylogeny of the brookii and prashadi groups with the description of three new Indian Hemidactylus Oken (Squamata: Gekkonidae).	Zootaxa	4619(3)	431–458	Journal article
690	Garg, S., Senevirathne, Wijayathilaka, N., Phuge, S., Deuti, K., Manamendra-Arachchi, K., Meegaskumbura, M. and Biju, S.D.	2018	2010-19	Amphibian	Frogs	8	Yes	No	No	Yes	Yes	2	0.25	1	0	0	0	0	0	0	0	TX	An integrative taxonomic review of the South Asian microhylid genus Uperodon	Zootaxa	4384(1)	1-88	Journal article
691	Karthik, P., Kalaimani, A. and Nagarajan, R.	2018	2010-19	Herpetofauna	Mixed	3	No	Yes	No	Yes	No	0	0	0	0	0	1	1	0	0	0	DivCon	An inventory on herpetofauna with emphasis on conservation from Gingee Hills, Eastern-Ghats, Southern India	Asian Journal of Conservation Biology	7(1)	2-16	Journal article
692	Varma, V. and Gharat, G.	2019	2010-19	Reptile	Snakes	2	No	Yes	No	Yes	No	0	0	0	0	0	0	0	0	0	1	OT	An unusual morph in Green Vine Snake, Ahaetulla nasuta spp.(Lacépède, 1789)(Serpentes: Colubridae: Ahaetullinae) from Matheran, Maharashtra, India	Records of the Zoological Survey of India	119(1)	88-90	Journal article
693	Venugopal, P.D.	2010	2010-19	Reptile	Lizards	1	No	Yes	No	Yes	No	0	0	0	0	0	1	0	0	0	0	Div	An updated and annotated list of Indian lizards (Reptilia: Sauria) based on a review of distribution records and checklists of Indian reptiles	Journal of Threatened Taxa	2(3)	725-738	Journal article
694	Lalitha, R. and Chandavar, V.R.	2018	2010-19	Reptile	Chelonians	2	Yes	No	Yes	No	Yes	2	1	0	0	0	0	0	0	1	0	Evol	Analysis of genetic diversity in CYTB and control region sequences of Melanochelys trijuga (Schweigger, 1812) from Karnataka	Journal of Asia-Pacific Biodiversity	11(3)	346-352	Journal article
695	Dutta, S.K.	2015	2010-19	Amphibian	Frogs	1	No	Yes	No	Yes	No	0	0	0	0	0	1	0	0	0	0	Div	Anuran fauna of Bastar Division of Chhattisgarh state, India	Ambient Science	2(2)	31-38	Journal article
696	Srikanthan, A.N., Kumar, G.C., Urs, A.J. and Ganesh, S.R.	2018	2010-19	Reptile	Lizards	4	No	Yes	No	Yes	Yes	1	0.25	1	0	0	0	0	0	1	0	TXEvol	Appearances are deceptive: molecular phylogeny recovers the Scaly Gecko Hemidactylus scabriceps (Reptilia: Squamata: Gekkonidae) as a member of a …	Journal of Threatened Taxa	10	12147-12162	Journal article
697	Ganesh, S.R.	2012	2010-19	Amphibian	Frogs	1	No	Yes	No	Yes	No	0	0	0	0	1	0	0	0	0	0	BH	Arboreal behaviour in the Indian Painted Frog Kaloula taprobanica parker, 1934	Herpetotropicos	8(1-2)	67-70	Journal article
698	Kundu, S., Kumar, V., Murthy, B.H.C.K. and Chandra, K.	2018	2010-19	Reptile	Chelonians	4	No	Yes	No	Yes	No	0	0	1	0	0	0	0	0	0	0	TX	Archival sea turtles in National Zoological Collections of Zoological Survey of India	Records of the Zoological Survey of India	118(1)	39-43	Journal article
699	Deepak, V. and Karanth, P.	2018	2010-19	Reptile	Lizards	2	No	Yes	No	Yes	No	0	0	1	0	0	0	0	0	1	0	TXEvol	Aridification driven diversification of fan-throated lizards from the Indian subcontinent	Molecular Phylogenetics and Evolution	120	53-62	Journal article
700	Chattopadhyay, N.R., Chetia, A., Machahary, K.Q. and Dupak, O.	2018	2010-19	Reptile	Chelonians	4	No	Yes	No	Yes	No	0	0	0	0	0	0	1	0	0	0	Con	Assessment of Conservation Measures for Olive Ridley Sea Turtle (Lepidochelys Olivacea) Along Rushikulya Rookery, Ganjam Disrict, Odisha	International Journal of Marine Biology and Research	3(1)	2020-09-01	Journal article
701	Shanbhag, V., Ammanna, H.F. and Saidapur, S.K.	2010	2010-19	Reptile	Lizards	2	Yes	No	Yes	Yes	Yes	2	0.67	0	0	1	0	0	0	0	0	BH	Associative learning in hatchlings of the lizard Calotes versicolor: taste and colour discrimination	Amphibia-Reptilia	31(4)	475-481	Journal article
702	Mukherjee, R.K. and Parida, P.	2011	2010-19	Reptile	Lizards	2	No	Yes	Yes	No	Yes	1	0.5	0	1	1	0	0	0	0	0	EcolBH	Behavioral Ecology, Breeding Period, Sexual Dimorphism and Ovipositional Behavior of Psammophilus blanfordanus (Family: Agamidae): Case Study	Indian Journal of Applied Research	4(1)	28-32	Journal article
703	Laxme Senji, R.R., Khochare, S., deSouza, H.F., Ahuja, B., Suranse, V., Martin, G., Whitaker, R. and Sunagar, K.	2019	2010-19	Reptile	Snakes	8	Yes	Yes	No	Yes	Yes	1	0.125	0	0	0	0	1	0	0	1	DivOT	Beyond the ‘big four’: Venom profiling of the medically important yet neglected Indian snakes reveals disturbing antivenom deficiencies	PLoS Neglected Tropical Diseases	13(12)	e0007899	Journal article
704	Chandavar, V.R., Raghu, N., Lalitha R. and Naik, P.R.	2013	2010-19	Reptile	Chelonians	4	Yes	No	Yes	No	Yes	2	0.5	0	0	0	0	0	1	0	0	Dev	Biochemical indices to monitor health status with respect to reproductive cycle of Melanochelys trijuga	Journal of Applied and Natural Science	5(1)	118-124	Journal article
705	Khongwir, S., Hooroo, R.N.K. and Dutta, S.K.	2016	2010-19	Amphibian	Frogs	3	No	Yes	No	Yes	Yes	1	0.33	0	0	1	0	0	0	0	0	BH	Breeding and nesting behaviour of Rhacophorus maximus (Anura: Rhacophoridae) in Meghalaya, North East India.	Current Science	110(6)	1102-1105	Journal article
706	Hossain, M.L., Sarker, S.U, and Sarker, N.J.	2010	2010-19	Reptile	Chelonians	3	No	Yes	No	Yes	Yes	1	0.33	0	1	0	0	0	0	0	0	Ecol	Breeding biology aspects of spotted flapshell Turtle, Lissemys punctata (Lacepede 1788), in Bangladesh	Saudi Journal of Biological Sciences	17(1)	2020-12-05	Journal article
707	Seshadri, K.S., Gururaja K.V. and Bickford, D.P.	2015	2010-19	Amphibian	Frogs	3	No	Yes	No	Yes	No	0	0	0	0	1	0	0	0	0	0	BH	Breeding in bamboo: a novel anuran reproductive strategy discovered in Rhacophorid frogs of the Western Ghats, India	Biological Journal of the Linnean Society	114(1)	2020-01-11	Journal article
708	Deodhar, S. and Isvaran, K.	2017	2010-19	Reptile	Lizards	2	No	Yes	Yes	No	Yes	1	0.5	0	1	1	0	0	0	0	0	EcolBH	Breeding Phenology of Psammophilus dorsalis:Patterns in Time, Space and Morphology	Current Science	113	2120-2126	Journal article
709	Samson, A., Ramakrishnan, B., Rathinakumar, S., Sivashanker, R., Kumar, P.S. and Karthick, S.A.	2014	2010-19	Reptile	Snakes	6	No	Yes	No	Yes	Yes	1	0.17	0	0	0	1	0	0	0	0	Div	Calliophis bibroni (Bibroni Coral Snake): Rediscovery in Mudumalai Tiger Reserve, South India	Herpetological Bulletin	127	35-36	Journal article
710	Lobo, J.V. and Sreepada, K.S.	2015	2010-19	Reptile	Snakes	2	No	Yes	No	Yes	No	0	0	0	1	0	0	1	0	0	0	EcolCon	Captive breeding of the Montane trinket snake (Coelognathus helena monticollaris) at Pilikula Biological Park, Mangalore, Karnataka, India.	Herpetological Bulletin	113	29-30	Journal article
711	Ohler, A., Amarasinghe, A.T., Andreone, F., Bauer, A., Borkin, L., Channing, A., Chuaynkern, Y., Das, I., Deuti, K., Frétey, T., and Matsui, M.	2014	2010-19	Amphibian	Frogs	11	Yes	No	Yes	No	Yes	1	0.09	1	0	0	0	0	0	0	0	TX	Case 3666dicroglossidae Dubois, 1987 (Amphibia, Anura): proposed conservation	Bulletin of Zoological Nomenclature	71(4)	244-249	Journal article
712	Ganesh, S.R.	2010	2010-19	Herpetofauna	Mixed	1	No	Yes	No	Yes	No	0	0	1	0	0	0	0	0	0	0	TX	Catalogue of herpetological specimens in the Chennai Snake Park	Cobra	4(1)	1- 22	Journal article
713	Ganesh, S.R. and Asokan, J.R.	2010	2010-19	Herpetofauna	Mixed	2	No	Yes	No	Yes	No	0	0	1	0	0	0	0	0	0	0	TX	Catalogue of Indian herpetological specimens in the collection of the Government Museum Chennai, India	Hamadryad	35(1)	46-63	Journal article
714	Saikia, B. and Kharkongor, I.J.	2017	2010-19	Amphibian	Mixed	2	No	Yes	No	Yes	Yes	1	0.5	0	0	0	1	0	0	0	0	Div	Checklist of endemic amphibians of Northeast India	Records of the Zoological Survey of India	117(1)	91-93	Journal article
715	Sahoo, G., Mohapatra, B.K. and Dutta, S.K.	2010	2010-19	Reptile	Chelonians	3	Yes	No	Yes	No	Yes	1	0.33	0	0	0	0	0	1	0	0	Dev	Chemical composition and ultrastructure of shells of unfertilized eggs of Olive Ridley Turtles, Lepidochelys olivacea	Current Herpetology	29(1)	37-43	Journal article
716	Phansalkar, P.U., and Gowande, G.G.	2017	2010-19	Reptile	Snakes	2	No	Yes	No	Yes	No	0	0	0	0	1	0	0	0	0	0	BH	Climbing Behavior in the Checkered Keelback or Asiatic Water Snake Xenochrophis piscator (Schneider, 1799) (Colubridae: Natricinae) in the Western Ghats, India	Russian Journal of Herpetology	24(1)	73-74	Journal article
717	Mirza Z.A., Sanap, R.V. and Upadhaye, R.	2010	2010-19	Reptile	Lizards	3	No	Yes	No	Yes	No	0	0	1	0	0	0	0	0	0	0	TX	Comments on the Systematic Status of Eutropis allapallensis Schmidt, 1926 (Sauria: Squamata: Scincidae)	Russian Journal of Herpetology	17(4)	245-246	Journal article
718	Sarkar, D., Mital, A., Mondal, R., Kumar, R.S. and Talukdar, G.	2019	2010-19	Reptile	Chelonians	5	No	Yes	No	Yes	Yes	1	0.2	0	1	0	0	1	0	0	0	EcolCon	Community ponds: a tool for conservation'. A case study of Nilssonia gangetica (Cuvier, 1825) in Kashipur village, Uttar P radesh, India	Herpetology Notes	12	631-636	Journal article
719	Baruah, C., Devi, P. and Sharma, D.K.	2016	2010-19	Reptile	Chelonians	3	No	Yes	No	Yes	Yes	1	0.33	0	1	0	0	0	0	1	0	EcolEvol	Comparative morphometry and biogeography of the freshwater turtles of genus Pangshura (Testudines: Geoemydidae: Pangshura)	International Journal of Pure and Applied Zoology	4(1)	107-123	Journal article
720	Olori, J.C. and Bell, C.J.	2012	2010-19	Reptile	Snakes	2	Yes	No	Yes	No	Yes	1	0.5	0	0	0	0	0	0	1	0	Evol	Comparative skull morphology of uropeltid snakes (Alethinophidia: Uropeltidae) with special reference to disarticulated elements and variation	PLoS ONE	7(3)	e32450.	Journal article
721	Santra, V., Owens, J.B., Graham, S., Wüster, W., Kuttalam, S., Bharti, O. Selvan, M., Mukherjee, N. and Malhotra, A.	2019	2010-19	Reptile	Snakes	9	No	Yes	No	Yes	Yes	1	0.11	0	0	0	1	0	0	0	0	Div	Confirmation of Naja oxiana in Himachal Pradesh, India	Herpetological Bulletin	150	26-28	Journal article
722	Khan, A.	2019	2010-19	Reptile	Snakes	1	No	Yes	No	Yes	No	0	0	0	0	1	0	0	0	0	0	BH	Congregation of an Endemic Snake Rhabdops olivaceus (Beddome, 1863) In Northern Western Ghats, Maharashtra	Journal of the Bombay Natural History Society	116	6	Journal article
723	Stevenson, C.J.	2014	2010-19	Reptile	Crocodile	1	No	Yes	No	Yes	No	0	0	0	0	0	0	1	0	0	0	Con	Conservation of the Indian Gharial Gavialis gangeticus : successes and failures	Reptile Conservation	49(1)	150-161	Journal article
724	Rao, R.J.	2016	2010-19	Reptile	Chelonians	1	No	Yes	No	Yes	No	0	0	0	0	0	0	1	0	0	0	Con	Conservation Strategies of Indian Freshwater Turtles	Bionature	36(2)	71-79	Journal article
725	Cyriac, V.P., Kodandaramaiah, U.	2019	2010-19	Reptile	Snakes	2	No	Yes	No	Yes	No	0	0	0	0	1	0	0	0	1	0	BHEvol	Conspicuous colours reduce predation rates in fossorial uropeltid snakes	PeerJ	7	e7508	Journal article
726	Mahony, S., Kamei, R.G., Teeling, E.C. and Biju, S.D.	2018	2010-19	Amphibian	Frogs	4	No	Yes	No	Yes	Yes	2	0.5	1	0	0	0	0	0	1	0	TXEvol	Cryptic diversity within the Megophrys major species group (Amphibia: Megophryidae) of the Asian Horned Frogs: Phylogenetic perspectives and a taxonomic revision of South Asian taxa, with descriptions of four new species.	Zootaxa	4523(1)	1-96	Journal article
727	Agarwal, I., Bauer, A.M., Jackman, T.R. and Karanth P.	2014	2010-19	Reptile	Lizards	4	No	Yes	No	Yes	No	0	0	1	0	0	0	0	0	1	0	TXEvol	Cryptic species and Miocene diversification of P alaearctic naked‐toed geckos (S quamata: G ekkonidae) in the I ndian dry zone	Zoologica Scripta	43(5)	455-471	Journal article
728	Cyriac, V.P. and Umesh, P.K.	2013	2010-19	Reptile	Lizards	2	No	Yes	No	Yes	No	0	0	1	0	0	0	0	0	0	0	TX	Current status of Cnemaspis littoralis (Jerdon, 1853)(Sauria: Gekkonidae) with designation of a neotype	Taprobanica: The Journal of Asian Biodiversity	5(10)	36-43	Journal article
729	Mirza, Z.A., Vaze, V.V. and Sanap, R.V.	2011	2010-19	Reptile	Snakes	3	No	Yes	No	Yes	No	0	0	0	0	1	0	0	0	0	0	BH	Death feigning behavior in two species of the genus Lycodon of Asia (Squamata: Colubridae)	Herpetology Notes	4	295-297	Journal article
730	Patel, H., Naik, V. and Tank, S.K.	2016	2010-19	Reptile	Lizards	3	No	Yes	No	Yes	No	0	0	0	0	1	0	0	0	0	0	BH	Death-feigning behavior in two species of Lygosoma (Squamata: Scincidae) from India	Phyllomedusa: Journal of Herpetology	15	191–194	Journal article
731	Soud, R., Mazumdar, K., Gupta, A. and Talukdar, S.	2012	2010-19	Amphibian	Frogs	4	No	Yes	No	Yes	Yes	1	0.25	0	0	1	0	0	0	0	0	BH	Defensive and burrowing behaviour of Kaloula assamensis Das et al 2014 and Kaloula pulchra Gray 1831 (Microhylidae)	Frog Leg	18	48-51	Journal article
732	Melvinselvan, G. and Nibedita, D.	2016	2010-19	Reptile	Snakes	2	No	Yes	No	Yes	Yes	1	0.5	0	0	1	0	0	0	0	0	BH	Defensive Caudal Display in Uropeltis pulneyensis Beddome 1863 (Serpentes: Uropeltidae) from Palani Hills, Western Ghats, India.	Russian Journal of Herpetology	23(1)	77-80	Journal article
733	Garg, S., Das, A., Kamei, R.G. and Biju, S.D.	2018	2010-19	Amphibian	Frogs	4	Yes	No	No	Yes	Yes	2	0.5	1	0	0	0	0	0	1	0	TXEvol	Delineating Microhyla ornata (Anura, Microhylidae): mitochondrial DNA barcodes resolve century-old taxonomic misidentification	Mitochondrial DNA Part B	3 (2)	856-861	Journal article
734	Tripathi, A. and Upadhyay, S.K.	2015	2010-19	Reptile	Chelonians	2	No	Yes	No	Yes	No	0	0	0	0	0	1	0	0	0	0	Div	Demography of Fresh Water Turtles in Confluence Area of Five Rivers (Panchnada) off Northern India	World Journal of Pharmacy and Pharmaceutical Sciences	5(1)	1112-1124	Journal article
735	Cyriac, V.P. and Umesh, P.K.	2014	2010-19	Reptile	Lizards	2	No	Yes	No	Yes	No	0	0	1	0	0	0	0	0	0	0	TX	Description of a New Ground-dwelling Cnemaspis strauch, 1887 (Squamata: Gekkonidae), from Kerala, Allied to C. Wynadensis	Russian Journal of Herpetology	21(3)	187-194	Journal article
736	Mathew, R. and Sen, N.	2010	2010-19	Amphibian	Frogs	2	Yes	No	Yes	No	Yes	2	1	1	0	0	0	0	0	0	0	TX	Description of a new species of Leptobrachium Tschudi, 1838 (Amphibia: Anura: Megophryidae) from Meghalaya, India	Records of the Zoological Survey of India	109	91-108	Journal article
737	Deepak, V., Khandekar, A., Varma, S. and Chaitanya, R.	2016	2010-19	Reptile	Lizards	4	No	Yes	No	Yes	No	0	0	1	0	0	0	0	0	0	0	TX	Description of a new species of Sitana Cuvier, 1829 from southern India	Zootaxa	4139	167-182	Journal article
738	Garg, S. and Biju, S.D.	2017	2010-19	Amphibian	Frogs	2	Yes	No	No	Yes	Yes	1	0.5	1	0	0	0	0	0	0	0	TX	Description of four new species of Burrowing Frogs in the Fejervarya rufescens complex (Dicroglossidae) with notes on morphological affinities of Fejervarya species in the Western Ghats	Zootaxa	4277(4)	451-490	Journal article
739	Parmar, D.S.	2019	2010-19	Reptile	Snakes	1	No	Yes	No	Yes	No	0	0	0	1	0	0	0	0	0	0	Ecol	Description of head scalation variation, hemipenis, reproduction, and behavior of the Indian Smooth Snake, Coronella brachyura (Günther 1866)	Amphibian & Reptile Conservation	13(1)	78-89	Journal article
740	Cyriac, V.P., Johny, A., Umesh, P.K. and Palot, M.J.	2018	2010-19	Reptile	Lizards	4	No	Yes	No	Yes	No	0	0	1	0	0	0	0	0	0	0	TX	Description of two new species of Cnemaspis Strauch, 1887 (Squamata: Gekkonidae) from the Western Ghats of Kerala, India	Zootaxa	4459	85-100	Journal article
741	Biju, S.D., Mahony, S. and Kamei, R.G.	2010	2010-19	Amphibian	Frogs	3	No	Yes	No	Yes	Yes	1	0.333333	1	0	0	0	0	0	0	0	TX	Description of two new species of torrent frog, Amolops Cope (Anura: Ranidae) from a degrading forest in the northeast Indian state of Nagaland	Zootaxa	2408(1)	31-46	Journal article
742	Deepak, V., Khandekar, A., Chaitanya, R. and Karanth, P.	2018	2010-19	Reptile	Lizards	4	No	Yes	No	Yes	No	0	0	1	0	0	0	0	0	0	0	TX	Descriptions of two new endemic and cryptic species of Sitana Cuvier, 1829 from peninsular India	Zootaxa	4434	327-365	Journal article
743	Kharkongor, I.J., Saikia, B. and Deb, R.	2016	2010-19	Amphibian	Frogs	3	Yes	No	Yes	No	Yes	2	0.67	0	1	0	0	0	0	0	0	Ecol	Detailed Study on Philautus garo (Boulenger, 1919)(Amphibia: Anura: Rhacophoridae)-An Extremely Rare and Endemic Species of North-East India.	Records of the Zoological Survey of India	116(4)	439-444	Journal article
744	Choudhary, S., Choudhury, B.C. and Gopi, G.V.	2017	2010-19	Reptile	Crocodile	3	Yes	No	Yes	No	Yes	1	0.33	0	1	0	0	1	0	0	0	EcolCon	Differential response to disturbance factors for the population of sympatric crocodilians ( Gavialis gangeticus and Crocodylus palustris ) in Katarniaghat Wildlife Sanctuary, India	Aquatic Conservation Marine and Freshwater Ecosystems	27(5)	946-952	Journal article
745	Olori, J.C.	2010	2010-19	Reptile	Snakes	1	Yes	No	Yes	No	Yes	1	1	0	0	0	0	0	0	1	0	Evol	Digital endocasts of the cranial cavity and osseous labyrinth of the burrowing snake Uropeltis woodmasoni (Alethinophidia: Uropeltidae)	Copeia	2010(1)	14-26	Journal article
746	Balakrishna, S., Batabyal, A. and Thaker, M.	2016	2010-19	Reptile	Lizards	3	No	Yes	Yes	No	Yes	2	0.666667	0	1	0	0	0	0	0	0	Ecol	Dining in the city: dietary shifts in Indian rock agamas across an urban–rural landscape	Journal of Herpetology	50(3)	423-428	Journal article
747	Subba, B., Sen, S., Ravikanth, G. and Nobis, M.P.	2018	2010-19	Amphibian	Mixed	4	Yes	No	Yes	No	Yes	1	0.25	0	1	0	0	0	0	0	0	Ecol	Direct modelling of limited migration improves projected distributions of Himalayan amphibians under climate change	Biological Conservation	227	352-360	Journal article
748	Mallik, A.K., Srikanthan, A.N., Ganesh, S.R., Pal, S.P., Vijayakumar, S.P. and Shanker, K.	2019	2010-19	Reptile	Snakes	6	No	Yes	No	Yes	No	0	0	1	0	0	0	0	0	1	0	TXEvol	Discovery of a deeply divergent new lineage of vine snake (Colubridae: Ahaetuliinae: Proahaetulla gen. nov.) from the southern Western Ghats of Peninsular India with a revised key for Ahaetuliinae	PLoS ONE	14(7)	e0218851	Journal article
749	Kamei, R.G., Mauro, D.S., Gower, D.J., VanBocxlaer, I., Sherratt, E., Thomas, A., Babu, S., Bossuyt, F., Wilkinson, M. and Biju, S.D.	2012	2010-19	Amphibian	Caecilians	10	Yes	No	No	Yes	Yes	3	0.3	1	0	0	0	0	0	1	0	TXEvol	Discovery of a new family of amphibians from northeast India with ancient links to Africa	Proceedings of the Royal Society of London B	279	2396–2401	Journal article
750	Sawant, N.S., Jadhav, T.D. and Shyama, S.K.	2010	2010-19	Reptile	Snakes	3	No	Yes	Yes	Yes	Yes	1	0.33	0	1	0	0	0	0	0	0	Ecol	Distribution and abundance of pit vipers (Reptilia: Viperidae) along the Western Ghats of Goa, India	Journal of Threatened Taxa	2(10)	1199-1204	Journal article
751	Hussain, Z. and Das, A.	2017	2010-19	Reptile	Snakes	2	No	Yes	No	Yes	No	0	0	0	0	0	1	0	0	0	0	Div	Distribution of Boiga forsteni (Duméril, Bibron et Duméril, 1854) in Northern India	Indian Forester	143(10)	1091-1092	Journal article
752	Litvinchuk, S., Skorinov, D., Mazepa, G. and Borkin, L.	2018	2010-19	Amphibian	Frogs	4	No	Yes	No	Yes	No	0	0	0	0	0	1	0	0	0	0	Div	Distribution of Bufotes latastii (Boulenger, 1882), endemic to the Western Himalaya.	Alytes	36(1-4)	314-327	Journal article
753	Pandirkar, A.H., Ghadigaonkar, P.S., Bandekar, P. and Jangam, P.	2016	2010-19	Herpetofauna	Mixed	4	No	Yes	No	Yes	No	0	0	0	0	0	1	0	0	0	0	Div	Distribution of herpetofauna in and around Ajoba fort, Thane district of Maharashtra, India	Advances in Applied Research	8(2)	117-121	Journal article
754	Sengupta, S., Das, A. and Ahmed, M.F.	2017	2010-19	Amphibian	Frogs	3	Yes	No	Yes	No	Yes	1	0.33	0	1	0	1	0	0	0	0	EcolDiv	Distribution of Rhacophorus burmanus (Anderson 1939) with notes on its natural history	Herpetozoa	29(3-4)	194-198	Journal article
755	Vyas, R.	2016	2010-19	Reptile	Snakes	1	No	Yes	No	Yes	No	0	0	0	0	0	1	0	0	0	0	Div	Distribution of the Indian Egg-eater (Elachistodon westermanni Reinhardt, 1864), with three new records from Gujarat, India, and descriptions of its pholidosis and hemipenis morphology	Sauria	38(1)	3	Journal article
756	Chettri, B., Bhupathy, S. and Acharya, B.K.	2010	2010-19	Reptile	Mixed	3	Yes	No	Yes	No	Yes	1	0.33	0	1	0	0	0	0	0	0	Ecol	Distribution pattern of reptiles along an eastern Himalayan elevation gradient, India	Acta Oecologica	36(1)	16-22	Journal article
757	Ganesh, S.R. and Arumugam, M.	2015	2010-19	Herpetofauna	Mixed	2	No	Yes	No	Yes	No	0	0	0	0	0	1	0	0	1	0	DivEvol	Distribution pattern, zoogeographic similarities and affinities of montane herpetofauna of Southern Eastern Ghats, peninsular India	Hyla: Herpetological bulletin	2015(2)	9-19	Journal article
758	Chaitanya, R., Giri, V.B., Deepak, V., Datta-Roy, A., Murthy, B.H.C.K. and Karanth, P.	2019	2010-19	Reptile	Lizards	6	No	Yes	No	Yes	No	0	0	1	0	0	0	0	0	1	0	TXEvol	Diversification in the mountains: a generic reappraisal of the Western Ghats endemic gecko genus Dravidogecko Smith, 1933 (Squamata: Gekkonidae) with …	Zootaxa	4688	1-56	Journal article
759	Jadhav, T.D., Sawant, N.S. and Shyama, S.K.	2018	2010-19	Reptile	Chelonians	3	Yes	No	Yes	No	Yes	1	0.33	0	0	0	1	0	0	0	0	Div	Diversity and distribution of freshwater turtles (Reptilia: Testudines) in Goa, India	Journal of Threatened Taxa	10(9)	12194–12202	Journal article
760	Deka, B. and Saikia, P.K.	2015	2010-19	Reptile	Chelonians	2	Yes	No	Yes	Yes	Yes	1	0.5	0	0	0	1	0	0	0	0	Div	Diversity of Chelonian species in Orang National Park, Assam, India	Journal of Global Biosciences	4(5)	2150-2167	Journal article
761	Boruah, B., Das, G.N., Payra, A., Dash, S.K., Pal, N.S., Das, U.P., Kar, N.B., Sethy, J., Palei, H.S., Nandi, S., Mishra, R.K. and Rout, S.D.	2016	2010-19	Herpetofauna	Mixed	12	No	Yes	No	Yes	Yes	1	0.08	0	0	0	1	0	0	0	0	Div	Diversity of Herpetofauna and their conservation in and around North Orissa University Campus, Odisha, India	NeBIO An international journal of environment and biodiversity	7(4)	138-145	Journal article
762	Rout, S., Baruah, B., Mishra, N. and Panda, T.	2016	2010-19	Herpetofauna	Mixed	4	No	Yes	No	Yes	Yes	1	0.25	0	0	0	1	0	0	0	0	Div	Diversity of herpetofaunal community in Kuldiha wildlife sanctuary, Odisha, India	Current Life Sciences	2(1)	9-14	Journal article
763	Lalrinchhana, C.C., Solanki, G.S. and Lalremsanga, H.T.	2015	2010-19	Reptile	Lizards	3	No	Yes	No	Yes	No	0	0	0	0	0	1	0	0	0	0	Div	Diversity of Saurian in Mizoram Northeast, India	Advances in Environmental Chemistry	64	106-108	Journal article
764	Manhas, A., Kotwal, A., Raina nee Wanganeo, R. and Wanganeo, A.	2015	2010-19	Herpetofauna	Mixed	4	No	Yes	No	Yes	Yes	1	0.25	0	0	0	1	1	0	0	0	ConDiv	Diversity, threats and conservation of herpetofauna in and around Barkatullah University, Bhopal (MP), India	International Journal of Advanced Research	3(9)	546-1553	Journal article
765	Yadav, O.V., Yankanchi, S.R. and Patil, A.M.	2014	2010-19	Herpetofauna	Mixed	3	No	Yes	No	Yes	No	0	0	0	0	0	1	0	0	0	0	Div	Diversity, threats and conservation of herpetofauna in Shivaji University Campus, Kolhapur, Maharashtra, India	International Journal of Current Microbiology and Applied Sciences	3(6)	742-74	Journal article
766	Chittaragi J.B. and Hosetti, B.B.	2014	2010-19	Reptile	Mixed	2	No	Yes	No	Yes	No	0	0	0	0	0	0	0	0	0	0		Diversity, Threats and Conservation of Reptiles in Kuvempu University Campus, Shankaraghatta, Mid Western Ghats, Shimoga	Journal of Pharmaceutical and Biological Archives	5(2)	64-69	Journal article
767	Kundu, S., Laskar, B.A., Venkataraman, K., Banerjee, S. and Kumar, V.	2016	2010-19	Reptile	Chelonians	5	No	Yes	No	Yes	Yes	1	0.2	0	0	0	0	0	0	1	0	Evol	DNA barcoding of Nilssonia congeners corroborates existence of wild N. nigricans in northeast India	Mitochondrial DNA Part A DNA Mapping, Sequencing, and Analysis	27(4)	2753-2756	Journal article
768	Biju, S.D., Garg, S., Gururaja, K.V., Shouch, Y., Walujkar, S.A.	2014	2010-19	Amphibian	Frogs	5	No	Yes	No	Yes	Yes	1	0.2	1	0	0	0	0	0	0	0	TX	DNA barcoding reveals unprecedented diversity in Dancing Frogs of India (Micrixalidae, Micrixalus): a taxonomic revision with description of 14 new species	Ceylon Journal of Science (Biological Sciences)	43(1)	37-123	Journal article
769	Biju, S.D., Garg, S., Mahony, S., Wijayathilaka, N., Senevirathne, G. and Meegaskumbura, M.	2014	2010-19	Amphibian	Frogs	6	No	Yes	No	Yes	Yes	2	0.33	1	0	0	0	0	0	0	0	TX	DNA barcoding, phylogeny and systematics of Golden-backed frogs (Hylarana, Ranidae) of the Western Ghats-Sri Lanka biodiversity hotspot, with the description of seven new species	Contributions to Zoology	83(4)	269-S4	Journal article
770	Sharma, C., Das, A., Mohanty, S., Shyamsunder, U., Keshar, S. and Das, I.	2018	2010-19	Reptile	Lizards	5	Yes	No	No	Yes	Yes	3	0.6	0	0	0	0	1	0	0	0	Con	DNA sequence monomorphism of Indian spiny-tailed lizard Saara hardwickii suggests urgent conservation	Journal of Entomology and Zoology Studies	6	1547-1551	Journal article
771	Sen, M.K. and Nama, K.S.	2013	2010-19	Reptile	Snakes	2	No	Yes	No	Yes	No	0	0	0	0	0	1	0	0	0	0	Div	Documentation of Ophiofauna of Mukundara Hills National Park, Kota,Rajasthan (India)	International Journal of Recent Biotechnology	1(1)	21-24	Journal article
772	Das, S.K., Dookia, S., Das, K. and Dutta, S.K.	2013	2010-19	Reptile	Lizards	4	No	Yes	No	Yes	Yes	1	0.25	0	1	0	0	0	0	0	0	Ecol	Ecological observations on the Indian Spiny-tailed Lizard Saara hardwickii (Gray, 1827)(Reptilia: Squamata: Agamidae) in Tal Chhapar Wildlife Sanctuary, Rajasthan, India	Journal of Threatened Taxa	5(1)	3516-3526	Journal article
773	Parida, P., Patra, D. and Mohanta, L.	2011	2010-19	Reptile	Lizards	3	Yes	No	Yes	Yes	Yes	1	0.666667	0	0	0	0	0	0	0	1	OT	Effect of Furadan on Protein, Reduced Glutathione, Lipid Peroxidation And Ascorbic Acid Content of Muscle of Psammophilus Blanfordanus	Indian Journal of Applied Research	4(3)	14-16	Journal article
774	Das, M., Bhattacharjee, P.C., Biswa, B. and Purkayastha, J.	2014	2010-19	Reptile	Lizards	4	Yes	No	Yes	No	Yes	1	0.25	0	1	0	0	0	0	0	0	Ecol	Effect of light and dark phase on dorsum colour and pattern in Hemidactylus sp. of Assam	Northeast Journal of Contemporary Research	1(1)	2020-07-01	Journal article
775	Thabah, C.M., Devi, L.M. and Hooroo, R.N.K.	2016	2010-19	Amphibian	Frogs	3	Yes	No	Yes	No	Yes	3	1	0	0	0	0	0	1	0	0	Dev	Effects of food quality on the development and metamorphosis in tadpoles of Hyla annectans	Journal of Science and Environment Today	UK	UK	Journal article
776	Seshadri, K.S.	2014	2010-19	Amphibian	Frogs	1	No	Yes	No	Yes	No	0	0	0	1	0	0	1	0	0	0	EcolCon	Effects of historical selective logging on anuran communities in a wet evergreen forest, south India	Biotropica	46(5)	615-623	Journal article
777	Sagar, H.S.S.C., Mrunmayee, M., Chethan, I.N., Kumar, M. and Girish, D.V.	2019	2010-19	Reptile	Chelonians	5	No	Yes	No	Yes	Yes	1	0.2	0	0	0	1	0	0	0	0	Div	Elusive, rare and soft: a new site record of Leith's Softshell Turtle Nilssonia leithii (Reptilia: Testudines: Trionychidae) from Bhadra Tiger Reserve, Karnataka, India	Journal of Threatened Taxa	11(13)	14770-14772	Journal article
778	Mirza, Z.A., Warekar, P., Mohapatra, P.P., Raju, D., Patil, P., Dutta, S.K. and Pal, S.	2019	2010-19	Amphibian	Frogs	8	No	Yes	No	Yes	Yes	1	0.125	1	0	0	0	0	0	0	0	TX	Endangered or an artifact of unsound taxonomy? Case of the critically endangered bush frog Philautus sanctisilvaticus Das and Chanda, 1997	Zootaxa	4683 (4)	563-576	Journal article
779	Umapathy, G., Deepak, V., Kumar, V., Chandrasekhar, M. and Vasudevan, K.	2015	2010-19	Reptile	Chelonians	5	No	Yes	No	Yes	Yes	1	0.25	0	0	0	0	0	1	0	0	Dev	Endocrine profiling of endangered tropical chelonians using noninvasive fecal steroid analyses	Chelonian Conservation and Biology	14(1)	108-115	Journal article
780	Mendiratta, U., Sheel, V. and Singh, S.	2017	2010-19	Reptile	Chelonians	3	Yes	No	Yes	No	Yes	2	0.67	0	0	0	0	1	0	0	0	Con	Enforcement seizures reveal large-scale illegal trade in India's tortoises and freshwater turtles	Biological Conservation	207	100-105	Journal article
781	Ansari, N.A.	2018	2010-19	Herpetofauna	Mixed	1	No	Yes	No	Yes	No	0	0	0	1	0	1	0	0	0	0	EcolDiv	Enumeration of herpetofaunal assemblage of Surajpur Wetland, National Capital Region (India)	Amphibian & Reptile Conservation	12(2)	90-97	Journal article
782	Mutnale, M.C., Anand, S., Eluvathingal, L.M., Roy, J.K., Reddy, G.S. and Vasudevan, K.	2018	2010-19	Amphibian	Frogs	6	No	Yes	No	Yes	Yes	1	0.16	0	0	0	0	1	0	1	0	ConEvol	Enzootic frog pathogen Batrachochytrium dendrobatidis in Asian tropics reveals high ITS haplotype diversity and low prevalence	Scientific Reports	8(1)	1-11	Journal article
783	Mohanty, N.P., Harikrishnan, S., Sivakumar, K. and Vasudevan, K.	2016	2010-19	Herpetofauna	Mixed	4	No	Yes	No	Yes	No	0	0	0	1	0	0	1	0	0	0	EcolCon	Impact of invasive spotted deer (Axis axis) on tropical island lizard communities in the Andaman archipelago.	Biological invasions	18(1)	9-15	Journal article
784	Mahony, S., Foley, N.M., Biju, S.D. and Teeling, E.C.	2017	2010-19	Amphibian	Frogs	4	No	Yes	Yes	Yes	Yes	2	0.5	0	0	0	0	0	0	1	0	Evol	Evolutionary history of the Asian Horned Frogs (Megophryinae): integrative approaches to timetree dating in the absence of a fossil record	Molecular Biology and Evolution	34(3)	744-771	Journal article
785	Pandav, B.N., Saidapur, S.K. and Shanbhag, B.A.	2012	2010-19	Reptile	Lizards	3	Yes	No	Yes	No	Yes	2	0.666667	0	1	0	0	0	0	1	0	EcolEvol	Expression of phenotypic plasticity in hatchlings of the lizard Calotes versicolor (Squamata: Agamidae): influence of nest moisture.	Phyllomedusa: Journal of Herpetology	11(1)	13-20	Journal article
786	Bahuguna, A. and Bhutia, P.T.	2010	2010-19	Reptile	Snakes	2	Yes	No	Yes	Yes	Yes	1	0.5	0	0	0	1	0	0	0	0	Div	Extension of the range and redescription of Lycodon jara (Shaw)(Reptilia: Serpentes: Colubridae)	Records of the Zoological Survey of India	110(4)	37-39	Journal article
787	Lalremsanga, H.T., Sailo, S. and Hooroo, R.N.K.	2017	2010-19	Amphibian	Frogs	3	No	Yes	No	Yes	Yes	2	0.67	1	0	1	0	0	0	0	0	TXBH	External Morphology, Oral Structure and Feeding Behaviour of Kaloula pulchra TADPOLES Gray, 1831 (Amphibia: Anura: Microhylidae)	Science and Technology Journal	5 (2)	97-102	Journal article
788	Shankar, P.G., Singh, A., Ganesh, S.R. and Whitaker R.	2013	2010-19	Reptile	Snakes	4	No	Yes	No	Yes	No	0	0	0	0	0	0	1	0	0	0	Con	Factors influencing human hostility to King Cobras (Ophiophagus hannah) in the Western Ghats of India	Hamadryad	36(2)	91-100	Journal article
789	Deepak, V. and Vasudevan, K.	2015	2010-19	Reptile	Chelonians	2	No	Yes	No	Yes	No	0	0	0	1	0	0	0	0	0	0	Ecol	Factors influencing the occurrence and vulnerability of the Travancore tortoise Indotestudo travancorica in protected areas in south India	Oryx	49 (4)	669-676	Journal article
790	Seshadri, K.S. and Bickford, D.P.	2018	2010-19	Amphibian	Frogs	2	No	Yes	No	Yes	No	0	0	0	0	1	0	0	0	0	0	BH	Faithful fathers and crooked cannibals: the adaptive significance of parental care in the bush frog Raorchestes chalazodes, Western Ghats, India	Behavioural ecology and sociobiology	72(1)	1-14	Journal article
791	Venkatraman, C., Padmanaban, P., Shrinivaasu, S. and Sivaleela, G.	2016	2010-19	Herpetofauna	Mixed	4	No	Yes	No	Yes	Yes	1	0.25	0	0	0	1	0	0	0	0	Div	Faunal Diversity of Bhitarkanika Mangroves, Odisha	Records of the Zoological Survey of India	116(4)	407-430	Journal article
792	Deepak, V., Noon, B.R. and Vasudevan, K.	2016	2010-19	Reptile	Chelonians	3	No	Yes	No	Yes	No	0	0	0	1	0	0	0	0	0	0	Ecol	Fine Scale Habitat Selection in Travancore Tortoises (Indotestudo travancorica) in the Anamalai Hills, Western Ghats	Journal of Herpetology	50	278-283	Journal article
793	Mirza Z.A., Gowande, G.G., Patil, R., Ambekar, M. and Patel, H.	2018	2010-19	Reptile	Lizards	5	No	Yes	No	Yes	Yes	1	0.2	1	0	0	0	0	0	0	0	TX	First appearance deceives many: disentangling the Hemidactylus triedrus species complex using an integrated approach	PeerJ	6	e5341	Journal article
794	Dutta, S.K.	2015	2010-19	Reptile	Snakes	1	No	Yes	No	Yes	No	0	0	0	0	0	1	0	0	0	0	Div	First locality record of Chrysopelea ornata Shaw, 1802 Golden Tree or Gliding Snake from Kanger Valley National Park, District-Bastar, Chhattisgarh	Biolife	3(4)	851-853	Journal article
795	Guptha, B., Prasad, N.V.S., Maddock, S.T. and Deepak, V.	2015	2010-19	Reptile	Snakes	4	No	Yes	No	Yes	No	0	0	0	0	0	1	0	0	0	0	Div	First record of Chrysopelea taprobanica Smith, 1943 (Squamata: Colubridae) from India	Check List	11(1)	1523	Journal article
796	Aengals, R.	2013	2010-19	Reptile	Lizards	1	No	Yes	No	Yes	No	0	0	0	0	0	1	0	0	0	0	Div	First record of Indian slender gecko (Hemiphyllodactylus aurantiacus) from Yelagiri hills, Tamil Nadu	Cobra	7(1)	24	Journal article
797	Singh, V. and Banyal, H.S.	2014	2010-19	Reptile	Lizards	2	No	Yes	No	Yes	No	0	0	0	0	0	1	0	0	0	0	Div	First record of Kashmir rock agama (Laudakia tuberculata hardwicke et gray, 1827) from Kalatop-Khajjiar wildlife sanctuary, Chamba (Himachal Pradesh), India	Russian Journal of Herpetology	21(3)	234-236	Journal article
798	Joshi,R., Singh, R. and Negi, M.S.	2011	2010-19	Reptile	Crocodile	3	No	Yes	No	Yes	No	0	0	0	0	0	1	0	0	0	0	Div	First record of mugger crocodile Crocodylus palustris (Lesson, 1831) from the Rajaji National Park, North India	International Journal of Biodiversity and Conservation	3(9)	444-450	Journal article
799	Patil, S.R., Atigre, R.H., and Patil, S.V.	2012	2010-19	Reptile	Crocodile	3	No	Yes	No	Yes	No	0	0	0	0	0	1	0	0	0	0	Div	First Record of Mugger Crocodile Crocodylus Palustrius (Lesson, 1831) from River Kadavi at Sarud, Tal, Shahuwadi, Dist. Kolhapur, MS, India	International Proceedings of Chemical, Biological & Environmental Engineering	27	100-104	Journal article
800	Lalremsanga, H.T., Lalrinsanga, V.M. and Vanlalhrima, V.G.	2018	2010-19	Reptile	Snakes	3	No	Yes	No	Yes	No	0	0	1	0	0	0	0	0	0	0	TX	First record of the species Gongylosoma scriptum (Theobald, 1868)(Squamata: Colubridae) from India	Hamadryad	38(1-2)	12-19	Journal article
801	Ganesh, S.R., Shankar, R.G. and Sreekar, R.	2012	2010-19	Reptile	Snakes	3	No	Yes	No	Yes	No	0	0	0	0	0	1	0	0	0	0	Div	First record of Wayanad shieldtail Melanophidium wynaudense (Beddome, 1863) from the Central Western Ghats, India	Hamadryad	36(1)	53-56	Journal article
802	Chaudhuri, A., Chakraborty, K. and Chowdhury, S.	2018	2010-19	Reptile	Snakes	3	No	Yes	No	Yes	No	0	0	0	0	0	0	0	0	0	1	OT	First report of leucism in Bungarus caeruleus (Serpentes: Elapidae) from West Bengal, India	Phyllomedusa: Journal of Herpetology	17(1)	161-163	Journal article
803	Lobo, J.V. and Sreepada, K.S.	2016	2010-19	Reptile	Snakes	2	No	Yes	No	Yes	No	0	0	0	0	0	0	0	0	0	1	OT	First report of leucism in Python molurus molurus (Serpentes: Pythonidae) from Mangalore, Karnataka, India	Phyllomedusa: Journal of Herpetology	15(2)	199-200	Journal article
804	Jadhav, T., Sawan, N. and Shyama, S.K.	2018	2010-19	Reptile	Chelonians	3	Yes	No	Yes	No	Yes	1	0.33	0	0	0	0	1	0	0	0	Con	First report on presence and status of introduced invasive species Red-eared Slider, Trachemys scripta elegans in Goa, India.	NeBIO An international journal of environment and biodiversity	9(2)	177-179	Journal article
805	Zambre, A.M. and Thaker, M.	2017	2010-19	Reptile	Lizards	2	No	Yes	No	Yes	Yes	1	0.5	0	0	1	0	0	0	0	0	BH	Flamboyant sexual signals: multiple messages for multiple receivers	Animal Behaviour	127	197-203	Journal article
806	Biju, S.D., Senevirathne, G., Garg, S., Mahony, S. and Kamei, R.G.	2016	2010-19	Amphibian	Frogs	5	No	Yes	No	Yes	Yes	3	0.6	1	0	0	0	0	0	0	0	TX	Frankixalus, a new rhacophorid genus of tree hole breeding frogs with oophagous tadpoles	PLoS ONE	11(1)	e0145727	Journal article
807	Senevirathne, G., Thomas, A., Kerney, R., Hanken, J., Biju, S.D. and Meegaskumbura, M.	2016	2010-19	Amphibian	Frogs	6	Yes	No	No	Yes	Yes	1	0.166667	0	0	0	0	0	1	0	0	Dev	From clinging to digging: the postembryonic skeletal ontogeny of the Indian Purple Frog, Nasikabatrachus sahyadrensis (Anura: Nasikabatrachidae)	PLoS ONE	11(3)	e0151114	Journal article
808	Agarwal, I. and Srikanthan, A.N.	2013	2010-19	Reptile	Snakes	2	No	Yes	No	Yes	No	0	0	0	0	0	1	0	0	0	0	Div	Further Records of the Sindh Awl-Headed Snake, Lytorhynchus paradoxus (Günther; 1875), from India with Notes on Its Habitat and Natural History	Russian Journal of Herpetology	20(3)	165-170	Journal article
809	Preininger, D., Stiegler, M.J., Gururaja K.V., Vijayakumar, S.P., Torsekar, V.R., Sztatecsny, M. and Hödl, W.	2013	2010-19	Amphibian	Frogs	7	Yes	No	Yes	No	Yes	1	0.14	0	0	1	0	0	0	0	0	BH	Getting a kick out of it: Multimodal signalling during male–male encounters in the foot-flagging frog Micrixalus aff. saxicola from the Western Ghats of India	Current Science	105(12)	1735-1740	Journal article
810	Katdare, S., Srivathsa, A., Joshi, A., Panke, P., Pande, R., Khandal, D. and Everard, M.	2011	2010-19	Reptile	Crocodile	7	No	Yes	No	Yes	Yes	1	0.14	0	1	0	0	1	0	0	0	EcolCon	Gharial (Gavialis gangeticus) populations and human influences on habitat on the River Chambal, India	Aquatic Conservation: Marine and Freshwater Ecosystems	21(4)	364-371	Journal article
811	Vijayakumar, S.P., Menezes, R.C., Jayarajan A. and Shanker, K.	2016	2010-19	Amphibian	Frogs	4	No	Yes	No	Yes	Yes	2	0.5	0	0	0	0	0	0	1	0	Evol	Glaciations, gradients, and geography: multiple drivers of diversification of bush frogs in the Western Ghats Escarpment	Proceedings of the Royal Society of London B	283(1836)	2016011	Journal article
812	Mahapatra, P.K., Sarkar, N., Das, S. and Dutta, S.K.	2010	2010-19	Reptile	Lizards	4	Yes	No	No	Yes	Yes	1	0.25	0	0	0	0	0	1	0	0	Dev	Gradient of reduced glutathione in the tail of Hemidactylus leschenaultii (Sauria: Gekkonidae)	Indian Journal of Experimental Biology	48	1094-1097	Journal article
813	Pal, A., Swain, M.M. and Rath, S.	2010	2010-19	Reptile	Lizards	3	No	Yes	No	Yes	Yes	1	0.33	0	1	0	0	0	0	0	0	Ecol	Growth and demography of the Fan-throated Lizard Sitana ponticeriana (Sauria: Agamidae) from a tropical environment in India	Herpetological bulletin	111	25-35	Journal article
814	Pandav, B.N., Shanbhag, B.A. and Saidapur, S.K.	2010	2010-19	Reptile	Lizards	3	Yes	No	Yes	No	Yes	2	0.666667	0	1	0	0	0	0	0	0	Ecol	Growth patterns and reproductive strategies in the lizard, Calotes versicolor raised in captivity	Acta Herpetologica	5(2)	131-142	Journal article
815	Adimalliah, D., Rao, V.V. and Surender, G.	2012	2010-19	Amphibian	Frogs	3	No	Yes	No	Yes	No	0	0	0	0	0	1	0	0	0	0	Div	Günther's toad Duttaphrynus hololius (Günther, 1876) from Nalgonda district, Andhra Pradesh	Cobra	6(2)	2020-08-11	Journal article
816	Bhatnagar, C., Meena, S.S. and Pandey, V.N.	2012	2010-19	Reptile	Lizards	3	Yes	No	Yes	Yes	Yes	2	0.66	0	1	0	0	0	0	0	0	Ecol	Habitat Preference of Trapelus agilis Olivier in Thar Desert of Jaisalmer, India	Russian Journal of Herpetology	19(3)	207-211	Journal article
817	Sawant, N.S., Jadhav, T.D. and Shyama, S.K.	2010	2010-19	Reptile	Snakes	3	No	Yes	No	Yes	Yes	1	0.33	0	1	0	0	0	0	0	0	Ecol	Habitat suitability, threats and conservation strategies of hump-nosed pit viper Hypnale hypnale Merrem (Reptilia: Viperidae) found in Western Ghats, Goa, India.	Journal of Threatened Taxa	2(11)	1261-1267	Journal article
818	Rao, C., Talukdar, G., Choudhury, B.C., Shankar, P.G., Whitaker R. and Goode, M.	2013	2010-19	Reptile	Snakes	6	No	Yes	No	Yes	No	0	0	0	1	0	0	0	0	0	0	Ecol	Habitat use of king cobra (Ophiophagus hannah) in a heterogeneous landscape matrix in the tropical forests of the Western Ghats, India	Hamadryad	36(2)	69-79	Journal article
819	Ramakrishnan, A., Palanivelrajan, M., Thangapadiyan, M., Sumathi, D. and Senthilkumar, K.	2018	2010-19	Reptile	Chelonians	5	No	Yes	No	Yes	Yes	1	0.33	0	0	0	0	0	1	0	0	Dev	Haematology analysis of rescued olive Ridley Sea Turtles (Lepidochelys olivacea)	Journal of Entomology and Zoology Studies	6(3)	1128-1131	Journal article
820	Parida, S.P., Dutta, S.K. and Pal, A.	2011	2010-19	Reptile	Lizards	3	No	Yes	No	Yes	No	0	0	0	0	0	0	0	1	0	0	Dev	Hematological and plasma biochemistry in Psammophilus blanfordanus (Sauria: Agamidae)	Comparative Clinical Pathology	21	1387–1394	Journal article
821	Parida, S.P., Dutta, S.K. and Pal, A.	2014	2010-19	Reptile	Snakes	3	No	Yes	No	Yes	No	0	0	0	0	0	0	0	1	0	0	Dev	Hematology and plasma biochemistry of wild-caught Indian cobra Naja naja (Linnaeus, 1758)	Journal of Venomous Animals and Toxins including Tropical Diseases	20	1-7	Journal article
822	Parida, S.P., Dutta, S.K. and Pal, A.	2013	2010-19	Reptile	Lizards	3	No	Yes	No	Yes	No	0	0	0	0	0	0	0	1	0	0	Dev	Hematology and plasma chemistry of wild Keeled Indian Mabuya, Eutropis carinata (Schneider 1801)	Comparative Clinical Pathology	22	869-873	Journal article
823	Muliya, S.K., and Bhat, M.N.	2016	2010-19	Reptile	Snakes	2	No	Yes	No	Yes	No	0	0	0	0	0	0	0	1	0	0	Dev	Hematology and serum biochemistry of Indian spectacled cobra (Naja naja) and Indian rat snake (Ptyas mucosa)	Veterinary World	9(8)	909-914	Journal article
824	Mahapatra, B.B., Das, M., Dutta, S.K. and Mahapatra, P.	2012	2010-19	Amphibian	Frogs	4	No	Yes	Yes	No	Yes	1	0.75	0	0	0	0	0	1	0	0	Dev	Hematology of Indian rhacophorid tree frog Polypedates maculatus Gray, 1833 (Anura: Rhacophoridae)	Comparative Clinical Pathology	21(4)	453-460	Journal article
825	Narayana, B.L., Surender, G. and Rao, V.V.	2014	2010-19	Reptile	Lizards	3	No	Yes	No	Yes	No	0	0	0	0	0	1	0	0	0	0	Div	Hemidactylus treutleri from Eastern Ghats, Andhra Pradesh, India	Taprobanica: The Journal of Asian Biodiversity	6(1)	55	Journal article
826	Sharma, V., Sayyed, A. and Bhandari, R.	2016	2010-19	Reptile	Snakes	3	No	Yes	Yes	Yes	Yes	1	0.33	0	1	0	0	0	0	0	0	Ecol	Herbivory and Inanimate Objects in the Diet of the Oriental Ratsnake, Ptyas mucosa (Linnaeus 1758)	International Reptile Conservation Foundation (IRCF) Reptiles & Amphibians	23(2)	102-103	Journal article
827	Das, A., Basu, D., Converse, L. and Choudhary, S.	2012	2010-19	Herpetofauna	Mixed	4	No	Yes	No	Yes	Yes	1	0.25	0	0	0	1	0	0	0	0	Div	Herpetofauna of Katerniaghat Wildlife Sanctuary, Uttar Pradesh, India	Journal of Threatened Taxa	4(5)	2553–2568	Journal article
828	Ganesh, S.R., Kalaimani, A., Karthik, P., Baskaran, N., Nagarajan, R. and Chandramouli, S.R.	2018	2010-19	Herpetofauna	Mixed	6	No	Yes	No	Yes	No	0	0	0	0	0	1	0	0	0	0	Div	Herpetofauna of Southern Eastern Ghats, India–II From Western Ghats to Coromandel Coast	Asian Journal of Conservation Biology	7(1)	28-45	Journal article
829	Chandramouli, S.R. and Ganesh, S.R.	2011	2010-19	Herpetofauna	Mixed	2	No	Yes	No	Yes	No	0	0	0	0	0	1	0	0	0	0	Div	Herpetofauna of southern Western Ghats, India–reinvestigated after decades	Taprobanica: The Journal of Asian Biodiversity	2(2)	72-85	Journal article
830	Chaitanya, R., Khandekar, A., Daniel, C.G., Mukherjee, N., Ghosh, A. and Giri, V.	2019	2010-19	Herpetofauna	Mixed	6	No	Yes	No	Yes	No	0	0	1	0	0	1	0	0	0	0	TXDiv	Herpetofauna of the Meghamalai Wildlife Sanctuary, Southern Western Ghats, India: An Updated Checklist With Annotations on Taxonomy and Nomenclature	Journal of the Bombay Natural History Society	115	21-37	Journal article
831	Patel, H., Vyas, R., Naik, V., Dudhatra, B. and Tank, S.K.	2018	2010-19	Herpetofauna	Mixed	5	No	Yes	No	Yes	No	0	0	0	0	0	1	0	0	0	0	Div	Herpetofauna of the Northern Western Ghats of Gujarat, India	Zoology and Ecology	28(3)	213-223	Journal article
832	Das, I.	2014	2010-19	Reptile	Chelonians	1	No	Yes	No	Yes	No	0	0	0	0	0	0	0	0	0	1	OT	Herpetological Material in Philately Issued from Malaysia.	Russian Journal of Herpetology	21(1)	13-39	Journal article
833	Lewis, T.R., Piggott, S., Griffin, R., Greig-Smith, P., Martin, G., Barretto, G., Bajibab, K., Thorpe-Dixon, J., Prodromou, P., Fordham, M., Willis, D., Turner, J., Radovanovic, A., Holloway, D., Wood, R., Hand, N., Lloyd, S., Clapson, M., Hennesy, J. and Oldham, G.	2019	2010-19	Herpetofauna	Mixed	20	No	Yes	No	Yes	Yes	2	0.1	0	0	0	1	0	0	0	0	Div	Herpetological observations from field expeditions to North Karnataka and Southwest Maharashtra, India	Herpetological Bulletin	112	17-37	Journal article
834	Kanagavela, A., and Raghavana, R.	2013	2010-19	Reptile	Chelonians	2	No	Yes	No	Yes	No	0	0	0	0	0	0	1	0	0	0	Con	Hunting of endemic and threatened forest-dwelling chelonians in the Western Ghats, India	Asian Journal of Conservation Biology	2(2)	172-177	Journal article
835	Mohanty, N.P., Harikrishnan, S., Sivakumar, K. and Vasudevan, K.	2016	2010-19	Reptile	Lizards	4	No	Yes	No	Yes	No	0	0	0	0	0	0	0	0	0	1	OT	Impact of invasive spotted deer (Axis axis) on tropical island lizard communities in the Andaman archipelago	Biological Invasions	18	9-15	Journal article
836	Baruah, P. and Goswami, U.C.	2012	2010-19	Amphibian	Mixed	2	Yes	No	Yes	No	Yes	1	0.5	0	0	0	0	0	1	0	0	Dev	In vitro metabolism of carotenoids, ß carotene and lutein into retinoids in amphibians	Journal of Ecobiotechnology	4(1)	46-50	Journal article
837	Roshnath, R., Kunhiraman, E. and Rajan, C.V.	2018	2010-19	Reptile	Snakes	3	No	Yes	No	Yes	No	0	0	0	0	0	0	1	0	0	0	Con	Incidence of snake bite and corresponding compensation payments in the Kannur district of Kerala, India	Herpetological Bulletin	143	26-29	Journal article
838	Gupta, R.C.	2011	2010-19	Reptile	Crocodile	1	No	Yes	No	Yes	No	0	0	0	0	1	0	0	0	0	0	BH	Indian marsh mugger and its tunnel residency behavioural patterns in a sanctuary premises in Haryana, India	Journal of Applied and Natural Science	3(1)	25-28	Journal article
839	Bindhani, U.T. and Das, A.	2018	2010-19	Amphibian	Frogs	2	No	Yes	No	Yes	No	0	0	0	0	0	0	0	0	0	1	OT	Individual identification of Duttaphrynus melanostictus (Schneider, 1799)(Amphibia: Anura: Bufonidae) based on dorsal wart patterns	Journal of Threatened Taxa	10(3)	12755-12768	Journal article
840	Sreekar, R. and Quader, S.	2013	2010-19	Reptile	Lizards	2	No	Yes	No	Yes	No	0	0	0	0	1	0	0	0	0	0	BH	Influence of gaze and directness of approach on the escape responses of the Indian rock lizard, Psammophilus dorsalis (Gray, 1831)	Journal of Biosciences	38(5)	829-833	Journal article
841	Das, M. and Purkayastha, J.	2012	2010-19	Reptile	Lizards	2	Yes	No	No	Yes	Yes	1	0.5	1	0	0	0	0	0	0	0	TX	Insight into hemipenial morphology of five species of Hemidactylus Oken, 1817 (Reptilia: Gekkonidae) of Guwahati, Assam, India	Hamadryad	36(1)	32-37	Journal article
842	Agarwal, I., Bauer, A.M., Jackman, T.R. and Karanth, P.	2014	2010-19	Reptile	Lizards	4	No	Yes	No	Yes	No	0	0	1	0	0	0	0	0	1	0	TXEvol	Insights into Himalayan biogeography from geckos: a molecular phylogeny of Cyrtodactylus (Squamata: Gekkonidae)	Molecular Phylogenetics and Evolution	80	145-155	Journal article
843	Priti, H., Roshmi, R.S., Ramya, B., Sudhira, H.S., Ravikanth, G., Aravind, N.A. and Gururaja K.V.	2016	2010-19	Amphibian	Frogs	7	Yes	No	No	Yes	Yes	3	0.428571	1	0	0	0	0	0	0	0	TX	Integrative taxonomic approach for describing a new cryptic species of bush frog (Raorchestes: Anura: Rhacophoridae) from the Western Ghats, India	PLoS ONE	11(3)	e0149382	Journal article
844	Vivek, S., Dinesh, M., Kumar, K.R., Divaker, Y. and Sharma, K.K.	2014	2010-19	Amphibian	Frogs	5	No	Yes	No	Yes	No	0	0	0	0	1	0	0	0	0	0	BH	Interspecies mating interactions between between Duttaphrynus stomaticus (Marbled Toad) and Sphaerotheca breviceps (Indian burrowing frog) at the central Aravalli foothills, Rajasthan, India	Herpetology Notes	7	139-140	Journal article
845	Lalitha, R. and Chandavar, V.R.	2018	2010-19	Reptile	Chelonians	2	Yes	No	Yes	No	Yes	2	1	0	0	0	0	0	1	0	0	Dev	Intraspecific variations in Cyt b and D-loop sequences of Testudine species, Lissemys punctata from south Karnataka	Journal of Advanced Research	9	87-95	Journal article
846	Nath, B. and Sharma, D.K.	2016	2010-19	Reptile	Chelonians	2	No	Yes	No	Yes	No	0	0	0	0	0	1	0	0	0	0	Div	Inventorization of Chelonian species of Dhubri district of Assam	Biolife	4(3)	498-502	Journal article
847	Banerjee, A.	2014	2010-19	Amphibian	Frogs	1	No	Yes	No	Yes	No	0	0	0	0	1	0	0	0	0	0	BH	Jelly secretion by a foam-nesting tree frog Chiromantis simus (Anura: Rhacophoridae): an unreported behaviour.	Alytes	31	77-82	Journal article
848	Shankar, P.G., Ganesh, S.R., Whitaker R. and Prashanth, P.	2013	2010-19	Reptile	Snakes	4	No	Yes	No	Yes	No	0	0	0	0	0	0	1	0	0	0	Con	King Cobra Ophiophagus hannah (Cantor, 1836) encounters in human-modified rainforests of the Western Ghats, India	Hamadryad	36(2)	62-68	Journal article
849	Mogali, S.M., Saidapur, S.K. and Shanbhag, B.A.	2011	2010-19	Amphibian	Frogs	3	No	Yes	Yes	No	Yes	1	0.333333	0	0	1	0	0	0	0	0	BH	Levels of predation modulate antipredator defense behavior and metamorphic traits in the toad Bufo melanostictus	Journal of Herpetology	45(4)	428-431	Journal article
850	Borah, M.M., Bordoloi, S., Purkayastha, J., Das, M., Dubois, A. and Ohler, A.	2013	2010-19	Amphibian	Frogs	6	Yes	No	Yes	No	Yes	4	0.67	0	0	0	1	0	0	0	0	Div	Limnonectes (Taylorana) medogensis (Fei, Ye & Huang, 1997) from Arunachal Pradesh (India), and on the identity of some diminutive ranoid frogs (Anura: Dicroglossidae, Occidozygidae)	Herpetozoa	26(1-2)	39-48	Journal article
851	Vijayakumar S.P., Dinesh, K.P., Prabhu, M.V. and Shanker K.	2014	2010-19	Amphibian	Frogs	4	No	Yes	No	Yes	No	0	0	1	0	0	0	0	0	1	0	TXEvol	Lineage delimitation and description of nine new species of bush frogs (Anura: Raorchestes, Rhacophoridae) from the Western Ghats Escarpment	Zootaxa	3893(4)	451-188	Journal article
852	Bhupathy, S. and Buhlmann, K.A.	2010	2010-19	Reptile	Chelonians	2	No	Yes	No	Yes	No	0	0	0	1	0	1	0	0	0	0	EcolDiv	Lissemys punctata (Bonnaterre, 1789)	Chéloniens	18	24-28	Journal article
853	Datta-Roy, A., Das, I., Bauer, A.M., Tron, R.K.L. and Karanth, P.	2013	2010-19	Reptile	Lizards	5	No	Yes	No	Yes	No	0	0	1	0	0	0	0	0	0	0	TX	Lizard wears shades. A spectacled Sphenomorphus (Squamata: Scincidae), from the sacred forests of Mawphlang, Meghalaya, North-east India	Zootaxa	3701(2)	257-276	Journal article
854	Batabyal, A. and Thaker, M.	2019	2010-19	Reptile	Lizards	2	Yes	No	Yes	No	Yes	2	1	0	0	1	0	0	0	0	0	BH	Lizards from suburban areas learn faster to stay safe	Biology Letters	15	20190009	Journal article
855	Agarwal, I., Goyal, A.P. and Qureshi, Q.	2015	2010-19	Reptile	Lizards	3	No	Yes	No	Yes	No	0	0	0	1	0	1	0	0	0	0	EcolDiv	Lizards of the Thar Desert–Resource partitioning and community composition	Journal of Arid Environments	1189	58-64	Journal article
856	Kanagavel, A. and Raghavan, R.	2012	2010-19	Reptile	Chelonians	2	No	Yes	No	Yes	No	0	0	0	1	0	0	0	0	0	1	EcolOT	Local ecological knowledge of the threatened Cochin Forest Cane Turtle Vijayachelys silvatica and Travancore Tortoise Indotestudo travancorica from the Anamalai Hills of the Western Ghats, India	Journal of Threatened Taxa	4(13)	3173–3182	Journal article
857	Dutta, D., Roy, J.K., Nath, A., Das, A., Sengupta, S. and Dutta, A.	2014	2010-19	Amphibian	Frogs	6	No	Yes	No	Yes	No	0	0	0	0	0	1	0	0	0	0	Div	Locality Record of Leptobrachium smithi Matsui, Nabhitabhata & Panha, 1999 (Anura: Megophryidae) on the north bank of Brahmaputra river in India	Asian Journal of Conservation Biology	2 (2)	168-171	Journal article
858	Das, I.	2012	2010-19	Herpetofauna	Mixed	1	No	Yes	No	Yes	No	0	0	0	0	0	0	0	0	0	1	OT	Looking East: Carolus Linnaeus and His Herpetological Species from Asia	Bibliotheca Herpetologica	9(1-2)	104-114	Journal article
859	Chaudhuri, A., Sharma, V. and Purkayastha, J.	2015	2010-19	Reptile	Snakes	3	No	Yes	No	Yes	No	0	0	1	0	0	0	0	0	0	0	TX	Lycodon odishii, a junior synonym of Lycodon jara, with notes on morphological variation in this species (Squamata, Colubridae)	Hamadryad	37(1-2)	95-103	Journal article
860	Kumar, S.S., Sivaperuman, C. and Yadav, B.P.	2012	2010-19	Reptile	Crocodile	3	No	Yes	No	Yes	No	0	0	0	0	0	0	1	0	0	0	Con	Management of problem saltwater crocodiles (Crocodylus porosus Schneider)–A case study in the Andaman and Nicobar Islands, India	Herpetological Bulletin	120	9-15	Journal article
861	Amdekar, M.S., Kakkar, A. and Thaker, M.	2018	2010-19	Herpetofauna	Mixed	3	Yes	No	Yes	No	Yes	3	1	0	1	0	0	0	1	0	0	EcolDev	Measures of health provide insights into the coping strategies of urban lizards	Frontiers in Ecology and Evolution	6	128	Journal article
862	Ganesh, S.R. and Arumugam, M.	2015	2010-19	Herpetofauna	Mixed	2	No	Yes	No	Yes	No	0	0	0	1	0	0	0	0	0	0	Ecol	Microhabitat use and abundance estimates of under storey herpetofauna in the highlands of southern Eastern Ghats, India, with observations on roadkill mortalities	Asian Journal of Conservation Biology	4(2)	43-150	Journal article
863	Seshadri, K.S., Singal, R., Priti, H., Ravikanth, G., Vidisha, M.K., Saurabh, S., Pratik, M. and Gururaja, K.V.	2016	2010-19	Amphibian	Frogs	8	No	Yes	No	Yes	Yes	2	0.25	1	0	0	0	0	0	0	0	TX	Microhyla laterite sp. nov., a new species of Microhyla Tschudi, 1838 (Amphibia: Anura: Microhylidae) from a laterite rock formation in South West India	PLoS ONE	11(3)	e0149727	Journal article
864	Thabah, C.M., Devi, L.M., Hooroo, R.N.K. and Dey, S.	2014	2010-19	Amphibian	Frogs	4	Yes	No	Yes	No	Yes	3	0.75	0	0	0	0	0	1	0	0	Dev	Microscopic studies on the effects of pH on the oral morphology of Hyla annectans tadpoles from North East India	Journal of Advanced Microscopy Research	9(4)	285-290	Journal article
865	Patel, H.A., Vyas, R. and Dudhatra, B.H.	2019	2010-19	Reptile	Snakes	3	No	Yes	No	Yes	No	0	0	1	0	0	1	0	0	0	0	TXDiv	Might Dendrelaphis caudolineatus (Gray, 1834)(Squamata: Colubridae) present in India?	Zootaxa	4571(2)	278–280	Journal article
866	Sharma, V., Meena, D., Kumawat, R.K., Yadav, D., Kumawat, N.K. and Sharma, K.K.	2014	2010-19	Reptile	Lizards	6	No	Yes	No	Yes	No	0	0	0	0	0	0	1	0	0	0	Con	Mining and habitat encroachment: a major threat to the population of Hemidactylus triedrus at central Aravalli foot hills, Rajasthan, India	International Journal of Environment & Animal Conservation	3	2020-08-01	Journal article
867	Kabir, M.S., Radhika, V. and Thaker, M.	2019	2010-19	Reptile	Lizards	3	No	Yes	Yes	No	Yes	2	0.666667	0	0	1	0	0	0	0	0	BH	Mismatch in receiver responses to multimodal signals in a diurnal gecko	Animal Behaviour	147	115-123	Journal article
868	Mondal, I., Kumar, R.S., Habib, B. and Taludar, G.	2016	2010-19	Reptile	Chelonians	4	No	Yes	No	Yes	No	0	0	0	0	0	1	0	0	0	0	Div	Modelling Fine Scale Movement Corridors for the Tricarinate Hill Turtle.	The International Archives of the Photogrammetry, Remote Sensing and Spatial Information Sciences	XLI-B8	719-725	Journal article
869	Garg, S. and Biju, S.D.	2016	2010-19	Amphibian	Frogs	2	Yes	No	No	Yes	Yes	1	0.5	1	0	0	0	0	0	0	0	TX	Molecular and morphological study of Leaping Frogs (Anura, Ranixalidae) with description of two new species	PLoS ONE	11 (11)	e0166326	Journal article
870	Baruah, C., Devi, P. and Sharma, D.K.	2015	2010-19	Reptile	Chelonians	3	No	Yes	Yes	Yes	Yes	1	0.33	0	0	0	0	0	0	1	0	Evol	Molecular characterization of freshwater turtle genus Pangshura based on structure and evolution of four selected proteins	European Journal of Biotechnology and Bioscience	3(11)	23-42	Journal article
871	Archana, B.	2012	2010-19	Reptile	Chelonians	1	Yes	No	Yes	No	Yes	1	1	0	0	0	0	0	0	1	0	Evol	Molecular characterization of some species of freshwater turtles of family Geoemydidae from India by using 12S rRNA gene	Annals of Forestry	20(1)	145-152	Journal article
872	Lajmi, A., Giri, V.B. and Karanth, P.	2016	2010-19	Reptile	Lizards	3	Yes	No	Yes	No	Yes	1	0.33	1	0	0	0	0	0	0	0	TX	Molecular data in conjunction with morphology help resolve the Hemidactylus brookii complex (Squamata: Gekkonidae)	Organism, Diversity and Evolution	16	659–677	Journal article
873	Bauer, A.M., JJackman, T.R., Greenbaum, E., de Silva, A., Giri, V.B. and Das, I.	2010	2010-19	Reptile	Lizards	6	No	Yes	No	Yes	No	0	0	1	0	0	0	0	0	0	0	TX	Molecular evidence for the taxonomic status of Hemidactylus brookii group taxa (Squamata: Gekkonidae)	The Herpetological Journal	20(3)	129-138	Journal article
874	Rajpoot, A., Bahuguna, A. and Kumar, V.P.	2019	2010-19	Reptile	Chelonians	3	Yes	No	Yes	No	Yes	2	0.67	0	0	0	0	0	0	1	0	Evol	Molecular study of globally threatened turtle species (families Trionychidae and Geoemydidae) of Uttarakhand and their relationship with other Indian populations: A wildlife forensic and conservation genetic approach	Forensic Science International: Reports	1	100039	Journal article
875	Gower, D.J., San Mauroa, D., Giri, V., Bhatta, G., Govindappa, V., Kotharambath, R., Oommen, V.O., Fatih, F.A., Mackenzie-Dodds, J.A., Nussbaum, R.A., Biju, S.D., Shouche, Y.S. and Wilkinson, M.	2011	2010-19	Amphibian	Caecilians	13	No	Yes	No	Yes	Yes	2	0.15	1	0	0	0	0	0	0	0	TX	Molecular systematics of caeciliid caecilians (Amphibia: Gymnophiona) of the Western Ghats, India	Molecular Phylogenetics and Evolution	59	698-707	Journal article
876	Das, I. and Sengupta, S.	2010	2010-19	Reptile	Chelonians	2	No	Yes	No	Yes	No	0	0	0	1	0	1	0	0	0	0	EcolDiv	Morenia petersi Anderson 1879–Indian eyed turtle	Chelonian Research Monographs	5	45	Journal article
877	Devi, L.M., Thabaha, C.M., Hoorooa, R.N.K. and Dey, S.	2016	2010-19	Amphibian	Frogs	4	Yes	No	Yes	No	Yes	3	0.75	0	0	0	0	0	1	0	0	Dev	Morphological and microstructural changes of the oral apparatus in two Anuran tadpoles, in regard to pH	Micron	82	41-51	Journal article
878	Ohler, A., Dutta, S. K., and Dubois, A.	2014	2010-19	Amphibian	Frogs	3	Yes	No	Yes	No	Yes	1	0.33	1	0	0	0	0	0	0	0	TX	Morphological evolution in frogs of the genera Fejervarya, Minervarya, Sphaerotheca and Zakerana (Dicroglossidae)	Pranikee-Journal of the Zoological Society of Orissa	26	2020-12-01	Journal article
879	Kundu, S., Kumar, V., Laskar, B.A., Tyagi, K. and Chandra, K.	2018	2010-19	Reptile	Chelonians	5	No	Yes	No	Yes	No	0	0	0	1	0	0	0	0	1	0	EcolEvol	Morphology and genetic variation in the endangered tortoise Manouria emys: distinct lineages or plastron anomalies?	Mitochondrial DNA Part B	3(1)	166-170	Journal article
880	Kalita, P.C., Kalita, A., Doley, P.J. and Rajkhowa, T.K.	2014	2010-19	Reptile	Chelonians	4	No	Yes	No	Yes	No	0	0	0	0	0	0	0	1	0	0	Dev	Morphology of the liver of the Asian Brown Tortoise (Manouria emys emys)	Journal on New Biological Reports	3(1)	22-24	Journal article
881	Priti, H., Gururaja K.V. and Ravikanth, G.	2015	2010-19	Amphibian	Frogs	3	Yes	No	Yes	No	Yes	1	0.333333	1	1	0	0	0	0	0	0	TXEcol	Morphology, natural history and molecular identification of tadpoles of three endemic frog species of Nyctibatrachus Boulenger, 1882 (Anura: Nyctibatrachidae) from central Western Ghats, India	Journal of Natural History	49(43-44)	2667-2681	Journal article
882	Nagar, P., Meena, S.M. and Dube, P.	2013	2010-19	Reptile	Mixed	3	No	Yes	Yes	Yes	Yes	1	0.33	0	0	0	0	1	0	0	0	Con	Mortality data of reptilian fauna due to vehicular traffic in south eastern Rajasthan, India	Bioscience Biotechnology Research Communication	6(2)	196-198	Journal article
883	Behera, S., Tripathy, B., Choudhury, B.C. and Sivakumar, K.	2018	2010-19	Reptile	Chelonians	4	No	Yes	No	Yes	No	0	0	0	1	0	0	0	0	0	0	Ecol	Movements of Olive Ridley Turtles (Lepidochelys olivacea) in the Bay of Bengal, India, Determined via Satellite Telemetry	Chelonian Conservation and Biology	17(1)	44-53	Journal article
884	Gururaja, K.V., Dinesh, K.P., Priti, H., and Ravikanth, G.	2014	2010-19	Amphibian	Frogs	4	No	Yes	No	Yes	Yes	1	0.25	1	0	1	0	0	0	0	0	TXBH	Mud-packing frog: a novel breeding behaviour and parental care in a stream dwelling new species of Nyctibatrachus (Amphibia, Anura, Nyctibatrachidae)	Zootaxa	3796(1)	33-61	Journal article
885	Vyas, R.	2010	2010-19	Reptile	Crocodile	1	No	Yes	No	Yes	No	0	0	0	1	0	0	0	0	0	0	Ecol	Mugger (Crocodylus palustris) population in and around Vadodara city, Gujarat state, India	Russian Journal of herpetology	17(1)	43-50	Journal article
886	Kumar, A., Kushwaha, S. and Namdev, A.	2019	2010-19	Reptile	Crocodile	3	No	Yes	Yes	No	Yes	1	0.33	0	0	0	1	0	0	0	0	Div	Mugger (Crocodylus palustris) sightings in water bodies of Bundelkhand Region, India	International Journal of Zoology Studies	4(2)	63-67	Journal article
887	Vyas, R. and Vasava, A.	2019	2010-19	Reptile	Crocodile	2	No	Yes	No	Yes	No	0	0	0	1	0	0	1	0	0	0	EcolCon	Mugger Crocodile (Crocodylus palustris) Mortality Due to Roads and Railways in Gujarat, India	Herpetological Conservation and Biology	14(3)	615-626	Journal article
888	Debata, S., Purohit, S., Mahata, A., Jena, S.K. and Palita, S.K.	2018	2010-19	Reptile	Crocodile	5	No	Yes	No	Yes	Yes	1	0.2	0	0	0	0	1	0	0	0	Con	Mugger Crocodile Crocodylus palustris Lesson, 1831 (Reptilia: Crocodilia: Crocodylidae) in river Saberi of Godavari system in southern Odisha, India: conservation implications	Journal of Threatened Taxa	10(6)	11770-11774	Journal article
889	Freitas, E.S., Datta-Roy, A., Karanth, P., Grismer, L.L. and Siler, C.D.	2019	2010-19	Reptile	Lizards	5	Yes	No	Yes	No	Yes	1	0.2	1	0	0	0	0	0	1	0	TXEvol	Multilocus phylogeny and a new classification for African, Asian and Indian supple and writhing skinks (Scincidae: Lygosominae)	Zoological Journal of the Linnean Society	186	1067-1096	Journal article
890	Wang, K., Che, J., Lin, S., Deepak, V., Datta-Roy, A., Jiang, K., Jin, J., Chen, H. and Siler, C.D.	2019	2010-19	Reptile	Lizards	9	No	Yes	No	Yes	Yes	1	0.11	1	0	0	0	0	0	1	0	TXEvol	Multilocus phylogeny and revised classification for mountain dragons of the genus Japalura sl. (Reptilia: Agamidae: Draconinae) from Asia	Zoological Journal of the Linnean Society	185	246-247	Journal article
891	Datta, M.K.	2012	2010-19	Reptile	Chelonians	1	No	Yes	No	Yes	No	0	0	0	0	0	0	1	0	0	0	Con	Natural availability and trade of testudines in Tripura (India).	Environment and Ecology	30(4A)	1449-1451	Journal article
892	Chandramouli, S.R.	2018	2010-19	Amphibian	Frogs	1	No	Yes	No	Yes	No	0	0	0	1	0	0	0	0	0	0	Ecol	Natural history and breeding biology of the poorly known, endangered and endemic, Nicobarese tree frog Polypedates insularis Das, 1995	Spixiana	41(1)	147-154	Journal article
893	Ganesh, S.R. and Arumugam, M.	2015	2010-19	Amphibian	Frogs	2	No	Yes	No	Yes	No	0	0	0	1	0	1	0	0	0	0	EcolDiv	Natural History and distribution notes on the Sreeni's golden frog (Indosylvirana sreeni) in the Southern Eastern Ghats, peninsular India.	Alytes	32	59-65	Journal article
894	Gowande, G., Mishra, A. and Mirza Z.A.	2016	2010-19	Reptile	Lizards	3	No	Yes	No	Yes	No	0	0	1	0	0	0	0	0	0	0	TX	Neotype designation for Calotes versicolor Daudin, 1802 (Sauria: Agamidae) with notes on its systematics	Zootaxa	4126	271-279	Journal article
895	Kar S. and Pradhan, S.D.	2019	2010-19	Reptile	Crocodile	2	No	Yes	No	Yes	No	0	0	0	1	0	0	0	0	0	0	Ecol	Nest and Nesting of Estuarine Crocodiles, Crocodylus porosus Schneider in Bhitarkanika National Park of Odisha, India	Indian Forester	145(10)	946-953	Journal article
896	Whitaker, N., Shankar, P.G. and Whitaker R.	2013	2010-19	Reptile	Snakes	3	No	Yes	No	Yes	No	0	0	0	1	0	0	0	0	0	0	Ecol	Nesting ecology of the King Cobra (Ophiophagus hannah) in India	Hamadryad	36(2)	101-107	Journal article
897	Behera, S., Tripathy, B., Sivakumar, K., Choudhury, B.C., Dutta, S.K. and Pandav, B.	2018	2010-19	Reptile	Chelonians	6	No	Yes	No	Yes	No	0	0	0	1	0	0	0	0	0	0	Ecol	Nesting Space Dynamics and Its Relationship with the Arribada of Olive Ridley Turtles at Gahirmatha Rookery, East Coast of India	Journal of Herpetology	52(4)	381-386	Journal article
898	Warrell, D.A., Gutiérrez, J.M., Calvete. J.J. and Williams, D.	2013	2010-19	Reptile	Snakes	4	No	Yes	No	Yes	No	0	0	0	0	0	0	1	0	0	1	ConOT	New approaches & technologies of venomics to meet the challenge of human envenoming by snakebites in India.	The Indian journal of medical research	138(1)	38-59	Journal article
899	Dutta, D., Sengupta, S., Das, A.K. and Das, A.	2013	2010-19	Reptile	Snakes	4	No	Yes	No	Yes	No	0	0	0	0	0	1	0	0	0	0	Div	New distribution of records of Lycodon zawi (Serpentes: Colubridae) from Northeast India	Herpetology Notes	6	263-265	Journal article
900	Arockianathan, S., Santhoshkumar, P., Ramakrishnan, B., Karthick, S. and Gnaneswar, C.	2017	2010-19	Reptile	Snakes	5	No	Yes	No	Yes	No	0	0	0	0	0	1	0	0	0	0	Div	New distribution record of Nagarjunasagar Racer Platyceps bholanathi (Reptilia: Squamata: Colubridae) in Sigur, Nilgiris landscape, India.	Journal of Threatened Taxa	9(3)	10014-10017	Journal article
901	Das, K.C. and Gupta, A.	2015	2010-19	Reptile	Chelonians	2	No	Yes	No	Yes	No	0	0	0	1	0	1	0	0	0	0	EcolDiv	New distribution records of tortoises (Chelonia: Testudinidae) from Barak Valley, Assam, northeastern india with notes on ecology and vernacular traditional taxonomy	Journal of Threatened Taxa	7(3)	7017-7023	Journal article
902	Guptha, B., Rao, C., Prasad, S.N.V. and Babu, M.	2012	2010-19	Reptile	Snakes	3	No	Yes	No	Yes	No	0	0	0	0	0	1	0	0	0	0	Div	New Locality Record of Brown Vine Snake Ahaetulla pulverulenta in Seshachalam Biosphere Reserve, Eastern Ghats, Andhra Pradesh, India.	Universal Journal of Environmental Research & Technology	2(5)	456-457	Journal article
903	Kumbhar, A.S., Patwardhan, G.C., Pradhan, A.K. and Dungriyal N.S.	2011	2010-19	Reptile	Snakes	4	No	Yes	No	Yes	No	0	0	0	0	0	1	0	0	0	0	Div	New locality record of Coelognathus helena monticollaris (Schulz, 1992) from central India	Cobra	5(2)	31	Journal article
904	Deshwal, A. and Becker B.	2017	2010-19	Reptile	Snakes	2	No	Yes	No	Yes	No	0	0	0	0	0	1	0	0	0	0	Div	New Locality Record of Nagarjunasagar Racer (Coluber bholanathi)(Squamata: Serpentes: Colubridae) from Near Rishi Valley School, Andhra Pradesh, India	Russian Journal of Herpetology	24(3)	245-247	Journal article
905	Sharma, V., Neha, S., Jugal, K., Lal, J.B. and Kumar, S.K.	2011	2010-19	Reptile	Lizards	5	No	Yes	No	Yes	Yes	1	0.2	0	0	0	1	0	0	0	0	Div	New locality records of Chamaeleo zeylanicus (Laurenti) from certain semi arid areas of the Thar Desert of Rajasthan, India	Herpetology Notes	4	287-289	Journal article
906	Kantimahanti, M., Schlulz, K. and Sharma, V.	2015	2010-19	Reptile	Snakes	3	No	Yes	No	Yes	No	0	0	0	0	0	1	0	0	0	0	Div	New locality records of Coelognathus helena cf. monticollaris (Schulz, 1992) from Andhra Pradesh, India	Sauria	37(4)	71	Journal article
907	Ganesh, S.R., Adimallaiah, D. and Kailash, P.K.	2013	2010-19	Reptile	Snakes	3	No	Yes	No	Yes	No	0	0	0	0	0	1	0	0	0	0	Div	New locality records of Nagarjun Sagar racer snake, Coluber bholanathi Sharma, 1976/Nuevos registros de localidad para la serpiente corredora Coluber bholanathi …	Herpetotropicos: Tropical Amphibians & Reptiles	9(1-3)	9-13	Journal article
908	Dinesh, K.P., Radhakrishnan, C., Gururaja K.V. and Zacariya, A.	2010	2010-19	Amphibian	Frogs	4	No	Yes	No	Yes	No	0	0	0	0	0	1	0	0	0	0	Div	New locality records of Rhacophorus lateralis Boulenger, 1883 (Amphibia: Anura: Rhacophoridae), in Western Ghats, India	Journal of Threatened Taxa	2(6)	986-989	Journal article
909	Visvanathan, A.C., Sandeep, A. and Kolli, A.K.	2017	2010-19	Reptile	Snakes	3	No	Yes	No	Yes	No	0	0	0	0	0	1	0	0	0	0	Div	New locality records of the Stout Sand Snake Psammophis longifrons Boulenger, 1890 (Reptilia: Squamata: Lamprophiidae) in Telangana, India	Journal of Threatened Taxa	9(11)	10968-10970	Journal article
910	Bhusnar, A.R. and Patil, A.	2019	2010-19	Reptile	Snakes	2	No	Yes	No	Yes	No	0	0	0	0	0	1	0	0	0	0	Div	New occurrence record of Coronella brachyura (Gunther, 1866)(Reptilia-Squamata) from Kolhapur districts of Western Maharashtra, India.	IOSR Journal Of Pharmacy And Biological Sciences	14(6)	76-79	Journal article
911	Joshi, P., Misher, C. and Thorat, O.	2017	2010-19	Reptile	Lizards	3	No	Yes	Yes	No	Yes	1	0.333333	0	0	0	1	0	0	0	0	Div	New record of agamid lizard Trapelus agilis (Olivier, 1804)(Squamata: Agamidae) from Gujarat, India	Russian Journal of Herpetology	24	78-80	Journal article
912	Jins, V.J., Bhupathy, S. and Panigrahi, M.	2014	2010-19	Reptile	Snakes	3	No	Yes	No	Yes	Yes	1	0.33	0	0	0	1	0	0	0	0	Div	New record of Beddome’s coral snake Calliophis beddomei Smith, 1943 from the southern Western Ghats, India	Herpetology Notes	7	555-557	Journal article
913	Khandal, D., Sahu, Y.K. and Sharma, V.	2016	2010-19	Reptile	Snakes	3	No	Yes	No	Yes	No	0	0	0	0	0	1	0	0	0	0	Div	New record of Elachistodon westermanni Reinhardt, 1863 (Serpentes, Colubridae) for Rajasthan state, India	Russian Journal of Herpetology	23(4)	249-253	Journal article
914	Chandramouli, S.R. and Ganesh, S.R.	2012	2010-19	Reptile	Snakes	2	No	Yes	No	Yes	No	0	0	1	0	0	1	0	0	0	0	TXDiv	New Records of Bronzeback Snakes (Serpentes: Colubridae: Dendrelaphis) from the Central Western Ghats of India and a revised Key to south Indian Forms	Sauria	34(2)	59-60	Journal article
915	Harikrishnan, S. and Vasudevan, K.	2018	2010-19	Reptile	Lizards	2	No	Yes	No	Yes	No	0	0	0	1	0	1	0	0	0	0	EcolDiv	Niche dissociated assembly drives insular lizard community organization	Scientific Reports	8	11978	Journal article
916	Karthik, P. and Kalaimani, A.	2019	2010-19	Reptile	Lizards	2	No	Yes	No	Yes	No	0	0	0	1	0	0	0	0	0	0	Ecol	Niche partitioning and resource utilizations among three, sympatric agamid lizards in Gingee hills-Southern Eastern Ghats, India	International Journal of fauna and biological studies	6	10-15	Journal article
917	Zachariah, A., Dinesh, K.P., Kunhikrishnan, E., Das, S., Raju, D., Radhakrishnan, C., Palot, M.J. and Kalesh, S.	2011	2010-19	Amphibian	Frogs	5	No	Yes	No	Yes	No	0	0	1	0	0	0	0	0	0	0	TX	Nine new species of frogs of the genus Raorchestes(Amphibia: Anura: Rhacophoridae) from southern Western Ghats, India	Biosystematica	5(1)	25-48	Journal article
918	Kundu, S., Kumar, V., Murthy, B. and Chandra, K.	2018	2010-19	Reptile	Chelonians	4	No	Yes	No	Yes	No	0	0	1	0	0	0	0	0	0	0	TX	Non-Native Chelonians In The National Zoological Collections Of Zoological Survey Of India	Records of the Zoological Survey of India	18(1)	33-38	Journal article
919	Harpalani, M., Parvathy, S., Kanagavel, A., Eluvathingal, L.M. and Tapley B.	2015	2010-19	Amphibian	Frogs	5	Yes	No	No	Yes	Yes	3	0.6	0	1	0	1	1	0	0	0	EcolDivCon	Note on range extension, local knowledge and conservation status of the Critically Endangered Anamalai gliding frog Rhacophorus pseudomalabaricus in the Cardamom Hills of Western Ghats, India	Herpetological Bulletin	133	2020-01-06	Journal article
920	Sayyed, A.	2013	2010-19	Amphibian	Frogs	1	No	Yes	No	Yes	No	0	0	0	0	1	0	0	0	0	0	BH	Note on the Natural Crossbreeding in Family Rhacophoridae, Anura, Amphibia	Ela Journal	2(3)	2020-07-09	Journal article
921	Vyas, R.	2013	2010-19	Reptile	Snakes	1	No	Yes	No	Yes	No	0	0	0	0	0	1	0	0	0	0	Div	Notes and comments on distribution of a snake: Indian Egg Eater (Elachistodon westermanni)	Russian Journal of Herpetology	20(1)	39-42	Journal article
922	Mirza Z.A., Pal, S. and Sanap, R.V.	2010	2010-19	Reptile	Lizards	3	No	Yes	No	Yes	No	0	0	0	1	0	0	0	0	0	0	Ecol	Notes on a ground gecko Geckoella cf. collegalensis Beddome, 1870 (Squamata, Sauria, Gekkonidae) from India	Russian Journal of Herpetology	17(1)	8-14	Journal article
923	Das, I. and Deuti, K.	2011	2010-19	Amphibian	Frogs	2	No	Yes	No	Yes	No	0	0	0	0	0	0	0	0	0	1	OT	Notes on Date of Publication and Generic Identity of Leptobrachium nokrekensis Mathew and Sen,“2009” 2010 (Amphibia: Anura: Megophryidae)	Current Herpetology	30(1)	69-73	Journal article
924	Vyas, R. and Patel, H.	2013	2010-19	Reptile	Snakes	2	No	Yes	No	Yes	No	0	0	0	0	0	1	0	0	0	0	Div	Notes on distribution and natural history of Psammophis longifrons Boulenger 1896 (Serpentes: Psammophiidae: Psammophiinae) in Gujarat, India	Russian Journal of Herpetology	20(3)	217-222	Journal article
925	Bhosale, H. and Joshi, D.	2014	2010-19	Reptile	Snakes	2	No	Yes	No	Yes	No	0	0	0	1	0	1	0	0	0	0	EcolDiv	Notes on distribution, natural history and habitat use of a Colubridae snake, Rhabdops olivaceus (Beddome, 1863)	Russian Journal of Herpetology	21(3)	166-168	Journal article
926	Kalaimani, A.	2015	2010-19	Reptile	Lizards	1	No	Yes	No	Yes	No	0	0	0	1	0	0	0	0	0	0	Ecol	Notes on egg laying sites of Calodactylodes aureus (Beddome, 1870) in Tirupattur Forest Division, Southern India	Herpetological Bulletin	131	24-25	Journal article
927	Parmar, D.S.	2017	2010-19	Reptile	Snakes	1	No	Yes	No	Yes	No	0	0	0	1	0	0	0	0	0	0	Ecol	Notes on incubation and hatching in Coelognathus helena helena (Daudin, 1803) from Gujarat, India	Sauria	39(3)	2020-09-03	Journal article
928	Dandge, P.H. and Tiple, A.D.	2016	2010-19	Reptile	Snakes	2	No	Yes	No	Yes	No	0	0	0	1	0	1	0	0	0	0	EcolDiv	Notes on natural history, new distribution records and threats of Indian Egg Eater Snake Elachistodon westermanni Reinhardt, 1863 (Serpentes: Colubridae): Implications for conservation	Russian Journal of Herpetology	23(1)	55-62	Journal article
929	Das, S. and Biswas, A.	2017	2010-19	Reptile	Snakes	2	No	Yes	No	Yes	No	0	0	0	1	0	0	0	0	0	0	Ecol	Notes on the breeding ecology of monocled cobras (Naja kaouthia) from areas adjacent to Sundarban, India	Herpetological Bulletin	140	33-34	Journal article
930	Dolia, J.	2018	2010-19	Reptile	Snakes	1	No	Yes	No	Yes	No	0	0	0	1	0	0	0	0	0	0	Ecol	Notes on the distribution and natural history of the King Cobra (Ophiophagus hannah Cantor, 1836) from the Kumaon Hills of Uttarakhand, India	Herpetology Notes	11	217-222	Journal article
931	Purkayastha, J., Das, M., Bauer, A.M., Sengupta, S. and Dutta, S.K.	2010	2010-19	Reptile	Lizards	5	No	Yes	No	Yes	Yes	1	0.2	0	0	0	1	0	0	0	0	Div	Notes on the Hemidactylus bowringii complex (Reptilia: Gekkonidae) in India, and a change to the national herpetofaunal list	Hamadryad	35(1)	20-27	Journal article
932	Vyas, R.	2012	2010-19	Reptile	Snakes	1	No	Yes	No	Yes	No	0	0	0	0	0	0	1	0	0	0	Con	Notes on the trade in, and its effects on, the red sand boa (Eryx johnii johnii) in Gujarat, India	Sauria	34(2)	2020-08-03	Journal article
933	Purkayastha J., Das, M., Sengupta S. and Dutta S. K.	2010	2010-19	Reptile	Snakes	4	No	Yes	No	Yes	Yes	1	0.25	1	0	0	1	0	0	0	0	TXDiv	Notes on Xenochrophis schnurrenbergeri Kramer, 1977 (Serpentes: Colubridae) from Assam, India with some comments on its morphology and distribution	Herpetology Notes	3	175-180	Journal article
934	Gururaja, K.V.	2010	2010-19	Amphibian	Frogs	1	No	Yes	No	Yes	No	0	0	0	0	1	0	0	0	0	0	BH	Novel reproductive mode in a torrent frog Micrixalus saxicola (Jerdon) from the Western Ghats, India	Zootaxa	2642	45-52	Journal article
935	Lalremsanga, HT. and Hooroo, R.N.K.	2013	2010-19	Amphibian	Frogs	2	No	Yes	No	Yes	Yes	1	0.5	0	0	0	0	0	1	0	0	Dev	Observation on the normal development of Indian skipping frog, Euphlyctis cyanophlyctis (Anura: Dicroglossidae)	Bioresources and Traditional Knowledge of Northeast India	3	200-216	Journal article
936	Mohanraj, T.	2011	2010-19	Reptile	Chelonians	1	No	Yes	No	Yes	No	0	0	0	0	0	0	1	0	0	0	Con	Observations on the exploitation of sea turtles along the Tuticorin coast, Tamil Nadu, India	Indian Ocean Turtle Newsletter	14	9-11	Journal article
937	Pradhan, A. and Yonle, R.	2019	2010-19	Reptile	Chelonians	2	No	Yes	No	Yes	No	0	0	0	0	0	1	0	0	0	0	Div	Occurrence and Evidence of Lissemys punctata andersoni, a Sub-Species of Indian Flapshell Turtle, at Record Elevation of 1440m …	Uttar Pradesh Journal of Zoology	39(4)	166-170	Journal article
938	Sethy, C., Samantasinghar, L. and Pramanik, D.S.	2015	2010-19	Reptile	Chelonians	3	No	Yes	No	Yes	No	0	0	0	1	0	1	0	0	0	0	EcolDiv	Occurrence and habitat type of seven non marine chelonian species in some parts of Odisha, India	European Journal of Experimental Biology	5(10)	6-14	Journal article
939	Behera, S., Sivakumar, K., Choudhury, B.C., Tripathy, B. and Kar, C.S.	2012	2010-19	Reptile	Chelonians	5	No	Yes	No	Yes	No	0	0	0	0	0	0	1	0	0	0	Con	Occurrence of Olive Ridley (Lepidochelys olivacea) Solitary Nests and their Future Conservation Implications in Gahirmatha Rookery, Odisha, India	Indian Forester	138(10)	869-875	Journal article
940	Ganesh, S.R.	2011	2010-19	Reptile	Snakes	1	No	Yes	No	Yes	No	0	0	1	0	0	0	0	0	0	0	TX	On a rare, South Indian burrowing snake Platyplectrurus trilineatus (Beddome, 1867)	Taprobanica: The Journal of Asian Biodiversity	3(1)	11-14	Journal article
941	Saikia, B., Kharkongor, I.J. and Imam, I.	2018	2010-19	Amphibian	Frogs	3	No	Yes	Yes	No	Yes	1	0.33	0	0	0	1	0	0	0	0	Div	On a report of Pterorana khare Kiyasetuo and Khare, 1986 (Amphibia: Anura: Ranidae) from Bandarkhal, Southern Assam, India	Records of the Zoological Survey of India	118(3)	307-309	Journal article
942	Chandramouli, S.R., Ganesh, S.R. and Baskaran, N.	2011	2010-19	Amphibian	Frogs	3	No	Yes	No	Yes	No	0	0	1	1	0	1	0	0	0	0	TXEcolDiv	On recent sightings of a little-known south Indian toad, Duttaphrynus hololius (Günther, 1876) with notes on its morphological characterization and ecology	Herpetology Notes	4	271-274	Journal article
943	David, P., Das I. and Vogel, G.	2011	2010-19	Reptile	Snakes	3	No	Yes	No	Yes	No	0	0	1	0	0	0	0	0	0	0	TX	On some taxonomic and nomenclature problems in Indian species of the genus Oligodon Fitzinger, 1826 (Squamata: Colubridae)	Zootaxa	2799(1)	1-14	Journal article
944	Gower, D.J., Giri, V.B., Kamei, R.G., Oommen, O.V., Khot, R. and Wilkinson, M.	2017	2010-19	Amphibian	Caecilians	6	No	Yes	No	Yes	Yes	1	0.166667	0	0	0	1	0	0	0	0	Div	On the absence of Ichthyophis sikkimensis Taylor, 1960 (Amphibia: Gymnophiona: Ichthyophiidae) in the Western Ghats of peninsular India.	Herpetological Journal	27(2)		Journal article
945	Mirza Z. and Upadhye, R.	2010	2010-19	Reptile	Lizards	2	No	Yes	No	Yes	No	0	0	0	0	0	1	0	0	0	0	Div	On the Distribution and Natural History of the endemic Eublepharid Gecko Eublepharis fuscus BÖRNER, 1981 in India	Sauria	32(3)	15-23	Journal article
946	Patel, H., Vyas R. and Vaghashiya, P.	2019	2010-19	Reptile	Snakes	3	No	Yes	No	Yes	No	0	0	0	0	0	1	0	0	0	0	Div	On the distribution of Ahaetulla laudankia Deepak, Narayanan, Sarkar, Dutta & Mohapatra, 2019 and Lycodon travancoricus (Beddome, 1870)(Squamata, Colubridae) from Gujarat, India	Check List	15(6)	1045-1050	Journal article
947	Sharma, V.	2014	2010-19	Reptile	Snakes	1	No	Yes	No	Yes	No	0	0	0	0	0	1	0	0	0	0	Div	On the distribution of Elachistodon westermanni Reinhardt, 1863 (Serpentes, Colubridae)	Russian Journal of Herpetology	21(3)	161-165	Journal article
948	Dieter, S.K., Tillack, F., Das, A. and Helfenberger, N.	2015	2010-19	Reptile	Snakes	4	No	Yes	No	Yes	No	0	0	1	0	0	0	0	0	0	0	TX	On the Identity and Taxonomic Status of Coluber nuthalli Theobald, 1868, with Redescription of the Type Specimens of Coluber nuthalli and Elaphis …	Asian Herpetological Research	6(1)	2020-10-01	Journal article
949	Melvinselvan, G. and Nibedita, D.	2017	2010-19	Reptile	Chelonians	2	No	Yes	No	Yes	Yes	1	0.5	0	0	0	1	0	0	0	0	Div	On the Occurrence of Asian Giant Softshell Turtle, Pelochelys cantorii Gray 1864, in Cauvery River, Tamil Nadu, Southern India.	Russian Journal of Herpetology	24(3)	238-240	Journal article
950	Ganesh, S.R.	2017	2010-19	Reptile	Lizards	1	No	Yes	No	Yes	No	0	0	1	0	0	1	0	0	0	0	TXDiv	On the poorly-known White-spotted Skink Lygosoma albopunctatum (Gray, 1846)(Reptilia: Scincidae) with further topotypical records and notes on the type locality	Journal of Threatened Taxa	9	10662-10668	Journal article
951	Chaitanya, R., Giri, V.B. and Deepak, V.	2017	2010-19	Reptile	Lizards	3	No	Yes	No	Yes	No	0	0	1	0	0	0	0	0	0	0	TX	On the recent designation of a neotype for the taxon Calotes versicolor (Daudin, 1802)(Reptilia: Agamidae)	Zootaxa	4317	585-587	Journal article
952	Agarwal, I., Giri, V.B. and Bauer, A.M.	2018	2010-19	Reptile	Lizards	3	No	Yes	No	Yes	No	0	0	1	0	0	0	0	0	0	0	TX	On the status of Cyrtodactylus malcolmsmithi (Constable, 1949)	Breviora	557	2020-11-01	Journal article
953	Giri, V.B., Chaitanya, R., Mahony, S., Lalrounga, S., Lalrinchhana, C., Das, A., Sarkar, V., Karanth, P. and Deepak, V.	2019	2010-19	Reptile	Lizards	9	No	Yes	No	Yes	No	0	0	1	0	0	0	0	0	0	0	TX	On the systematic status of the genus Oriocalotes Günther, 1864 (Squamata: Agamidae: Draconinae) with the description of a new species from Mizoram state …	Zootaxa	4638	451-484	Journal article
954	Datta-Roy, A., Deepak, V.P., Chaitanya, R., Murthy, C., Bhosale, H.S., Lajmi, A., Karanth, P., Kunte, K. and Giri, V.B.	2017	2010-19	Reptile	Lizards	9	No	Yes	No	Yes	Yes	1	0.111111	1	0	0	0	0	0	0	0	TX	On the taxonomic status of Eurylepis poonaensis (Squamata: Scincidae): resolving a long-standing conundrum	Salamandra	53	389-397	Journal article
955	Kamei, R.G. and Biju, S.D.	2016	2010-19	Amphibian	Caecilians	2	Yes	No	Yes	No	Yes	1	0.5	1	0	0	0	0	0	0	0	TX	On the taxonomic status of Ichthyophis husaini Pillai & Ravichandran, 1999 (Amphibia: Gymnophiona: Ichthyophiidae)	Zootaxa	4079(1)	140-150	Journal article
956	Ganesh, S.R., Dutta, S.K. and Chandramouli, S.R.	2017	2010-19	Amphibian	Frogs	3	No	Yes	No	Yes	No	0	0	1	0	0	0	0	0	0	0	TX	On the taxonomy and nomenclature of the common Indian cricket frog Rana agricola Jerdon, 1853 (Amphibia: Dciroglossidae)	Asian Journal of Conservation Biology	6(2)	107-113	Journal article
957	Ganesh, S.R., Rameshwaran, M., Joseph,N.A. and Jerith, A.M.	2017	2010-19	Reptile	Lizards	4	No	Yes	No	Yes	No	0	0	1	1	0	0	0	0	0	0	TXEcol	On two little-known terrestrial South Asian geckoes Hemidactylus reticulatus and Hemidactylus scabriceps (Reptilia: Gekkonidae)	Journal of Threatened Taxa	9	10171-10177	Journal article
958	Mahapatra, S., Dutta, S.K. and Sahoo, G.	2017	2010-19	Amphibian	Frogs	3	No	Yes	No	Yes	No	0	0	0	0	1	0	0	0	0	0	BH	Opportunistic predatory behaviour in Duttaphrynus melanostictus (Schneider, 1799) tadpoles.	Current Science	112 (8)	1755-1759	Journal article
959	Lalremsanga, H., Hooroo, R. and Lalronunga, S.	2013	2010-19	Amphibian	Frogs	3	No	Yes	No	Yes	Yes	1	0.33	1	0	1	0	0	0	0	0	TXBH	Oral morphology of the tadpoles of Euphlyctis cyanophlyctis (Schneider, 1799) with notes on feeding behaviour	Science and Technology Journal	1(2)	58-69	Journal article
960	Cyriac, V.P. and Kodandaramaiah, U.	2017	2010-19	Reptile	Snakes	2	No	Yes	No	Yes	No	0	0	0	0	0	0	0	0	1	0	Evol	Paleoclimate determines diversification patterns in the fossorial snake family Uropeltidae Cuvier, 1829	Molecular Phylogenetics and Evolution	116	97-107	Journal article
961	Meegaskumbura, M., Senevirathne, G., Biju, S.D., Garg, S., Meegaskumbura, S., Pethiyagoda, R., Hanken, J. and Schneider, C.J.	2015	2010-19	Amphibian	Frogs	8	No	Yes	No	Yes	Yes	3	0.375	0	0	0	0	0	0	1	0	Evol	Patterns of reproductive‐mode evolution in Old World tree frogs (Anura, Rhacophoridae)	Zoological Scripta	44(5)	509-522	Journal article
962	Ganesh, S.R., Asokan, S. and Kannan, P.	2010	2010-19	Reptile	Snakes	3	No	Yes	No	Yes	No	0	0	0	1	0	0	0	0	0	0	Ecol	Patterns of resource use, overlap and partitioning among three sympatric species of south Indian pitvipers	Herpetological Bulletin	113	14-19	Journal article
963	Ammanna, V.H.F., Saidapur, S.K. and Shanbhag, B.A.	2018	2010-19	Reptile	Lizards	3	Yes	No	Yes	No	Yes	2	0.67	0	1	0	0	0	0	1	0	EcolEvol	Perch Associated Expression of Phenotypic Plasticity in Limb Development and Sprint Speed in Agamid Lizard Calotes versicolor: A Laboratory Study	Asian Herpetological Research	9	175-181	Journal article
964	Kundu, S., Kumar, V., Laskar, B.A., Tyagi, K. and Chandra, K.	2018	2010-19	Reptile	Chelonians	5	No	Yes	No	Yes	No	0	0	0	0	0	0	0	0	1	0	Evol	Pet and turtle: DNA barcoding identified twelve Geoemydid species in northeast India	Mitochondrial DNA Part B	3(2)	513-518	Journal article
965	Bhaskar, R. and Mohindra, V.	2019	2010-19	Reptile	Chelonians	2	Yes	No	Yes	No	Yes	2	1	0	0	0	0	0	0	1	0	Evol	Phylogenetic relationships among Indian freshwater turtles (family Trionychidae and Geoemydidae) with special reference to Lissemys punctata, inferred from …	Meta Gene	22	100610	Journal article
966	Lajmi, A., Bansal, R., Giri, V. and Karanth, P.	2019	2010-19	Reptile	Lizards	4	Yes	No	No	Yes	Yes	2	0.5	0	0	0	0	0	0	1	0	Evol	Phylogeny and biogeography of the endemic Hemidactylus geckos of the Indian subregion suggest multiple dispersals from Peninsular India to Sri Lanka	Zoological Journal of the Linnean Society	186	286-301	Journal article
967	Sanchez, E., Biju, S.D., Mohammed M.I., Mahmudul H., Ohler, A., Vences, M. and Kurabayashi, A.	2018	2010-19	Amphibian	Frogs	7	Yes	No	No	Yes	Yes	2	0.285714	1	0	0	0	0	0	1	0	TXEvol	Phylogeny and classification of fejervaryan frogs (Anura: Dicroglossidae)	Salamandra	54 (2)	109-116	Journal article
968	Mohan, A.V., Visvanathan, A.C. and Vasudevan, K.	2018	2010-19	Reptile	Snakes	3	Yes	No	No	Yes	Yes	1	0.33	1	0	0	0	0	0	0	0	TX	Phylogeny and conservation status of the Indian egg-eater snake, Elachistodon westermanni Reinhardt, 1863 (Serpentes, Colubridae)	Amphibia-Reptilia	39(3)	317-324	Journal article
969	Datta-Roy, A., Singh, M., Srinivasulu, C. and Karanth, P.K.	2012	2010-19	Reptile	Lizards	4	No	Yes	No	Yes	No	0	0	0	0	0	0	0	0	1	0	Evol	Phylogeny of the Asian Eutropis (Squamata: Scincidae) reveals an 'into India'endemic Indian radiation	Molecular Phylogenetics and Evolution	63(3)	817-824	Journal article
970	Harikrishnan, S., Vasudevan, K., de Sliva, A. and Deepak, V. NILADRI BHUSAN KAR3, ROHIT NANIWADEKAR4, ALBERT LALREMRUATA5, K. REBEKAH PRASOONA5 and RAMESH K AGGARWAL5	2012	2010-19	Reptile	Lizards	9	No	Yes	No	Yes	Yes	1	0.11	1	0	0	0	0	0	1	0	TXEvol	Phylogeography of Dasia Gray, 1830 (Reptilia: Scincidae), with the description of a new species from southern India	Zootaxa	3233	37-51	Journal article
971	Chan, K.O., Grismer, L.L., Zachariah, A., Brown, R.M., and Abraham, R.K.	2016	2010-19	Amphibian	Frogs	5	No	Yes	No	Yes	No	0	0	1	0	0	0	0	0	1	0	TXEvol	Polyphyly of Asian tree toads, genus Pedostibes Günther, 1876 (Anura: Bufonidae), and the description of a new genus from Southeast Asia	PLoS ONE	11(1)	e0145903	Journal article
972	Kumar, R.S., Harihar, A. and Pandav, B.	2010	2010-19	Reptile	Chelonians	3	No	Yes	No	Yes	No	0	0	0	1	0	0	0	0	0	0	Ecol	Population characteristics of a terrestrial geoemydid, Melanochelys tricarinata, from the Doon Valley, northern India	The Herpetological Journal	20(3)	139-146	Journal article
973	Mohan, A.V., Swamy, P. and Shanker, K.	2018	2010-19	Reptile	Snakes	3	Yes	No	Yes	No	Yes	2	0.67	0	0	0	0	0	0	1	0	Evol	Population structure in the Andaman keelback, Xenochrophis tytleri: geographical distance and oceanic barriers to dispersal influence genetic divergence on …	PeerJ	6	e5752	Journal article
974	Kanagavel, A., Rehel, S.M. and Raghavan, R.	2013	2010-19	Reptile	Chelonians	3	No	Yes	No	Yes	No	0	0	0	1	0	0	1	0	0	0	EcolCon	Population, ecology, and threats to two endemic and threatened terrestrial chelonians of the Western Ghats, India	International Scholarly Research Notice Biodiversity	2013	1-8	Journal article
975	Smart, U., Deepak, V. and Vasudevan, K.	2014	2010-19	Reptile	Chelonians	3	No	Yes	No	Yes	No	0	0	0	1	0	0	0	0	0	0	Ecol	Preliminary ethogram and in situ time-activity budget of the enigmatic cane turtle (Vijayachelys silvatica) from the western Ghats, south India	Herpetological Conservtion and Biology	9(1)	116-122	Journal article
976	Patel, H., Vyas, R., Dudhatra,B., Naik, V., Chavda, A., Chauhan, D., Vaghashiya, A., Vagadiya, R. and Vaghashiya, P.	2019	2010-19	Herpetofauna	Mixed	9	No	Yes	No	Yes	No	0	0	0	0	0	1	0	0	0	0	Div	Preliminary report on Herpetofauna of Mount Girnar, Gujarat, India	Journal of Animal Diversity	1(2)	9-35	Journal article
977	Yadav, O.V. and Yankanchi, S.R.	2014	2010-19	Herpetofauna	Mixed	2	No	Yes	No	Yes	No	0	0	0	0	0	1	0	0	0	0	Div	Preliminary study of herpetofaunal diversity in Radhanagari Wildlife Sanctuary (WLS), Kolhapur, Maharashtra, India	Biolife	2(4)	1154-1159	Journal article
978	Bardi,E., Lubian, E., Whitaker, N. and Romussi, S.	2018	2010-19	Reptile	Chelonians	4	No	Yes	No	Yes	No	0	0	0	0	0	0	0	1	0	0	Dev	Preliminary study on hematological values of two endangered turtle species: Indotestudo travancorica and Batagur kachuga	International Journal of Health, Animal Science and Food Safety	5(1)	1-2	Journal article
979	Ammanna, V.H.F., Saidapur, S.K. and Shanbhag, B.A.	2014	2010-19	Reptile	Lizards	3	Yes	No	Yes	No	Yes	2	0.666667	0	1	0	0	0	0	0	0	Ecol	Prey detection in juveniles of an agamid lizard, Calotes versicolor (Daudin, 1802) (Reptilia: Squamata)	Italian Journal of Zoology	81	155-159	Journal article
980	Walmiki, N., Kumbhar, A. and Gupta, B.	2012	2010-19	Reptile	Snakes	3	No	Yes	No	Yes	No	0	0	0	0	0	1	0	0	0	0	Div	Range Extension of Slender Racer (Coluber gracilis Gunther, 1862) in India	World Journal of Zoology	7(4)	303-305	Journal article
981	Surendran, H. and Vasudevan, K.	2013	2010-19	Amphibian	Frogs	2	No	Yes	No	Yes	No	0	0	0	0	0	1	0	0	0	0	Div	Recent introduction and spread of Indian bullfrog Hoplobatrachus tigerinus (Daudin, 1802) into the Andaman Islands	Aliens: Invasive Species Bulletin	33	42-43	Journal article
982	Harikrishnan, S., Choudhary, B.C. and Vasudevan, K.	2010	2010-19	Reptile	Snakes	3	No	Yes	No	Yes	No	0	0	0	0	0	1	0	0	0	0	Div	Recent records of snakes (Squamata: Serpentes) from Nicobar Islands, India	Journal of Threatened Taxa	2(11)	1297-1300	Journal article
983	Sagadevan, J., Ganesh, S.R., Anandan, N. and Rajasingh, R.	2019	2010-19	Reptile	Snakes	4	Yes	No	No	Yes	Yes	1	0.25	0	0	0	1	0	0	0	0	Div	Recent records of the Banded Racer Argyrogena fasciolata (Shaw, 1802) (Reptilia: Squamata: Colubridae) from southern Coromandel Coast, peninsular India	Journal of Threatened Taxa	11(5)	13567-13572	Journal article
984	Palot, M.J. and Sureshan, P.M.	2017	2010-19	Amphibian	Frogs	1	No	Yes	No	Yes	No	0	0	0	0	0	1	0	0	0	0	Div	Recent Sight Records of Black Microhylid Frog, Melanobatrachus indicus Beddome, 1878 in Marayoor Forests, Idukki District, Kerala.	Russian Journal of Herpetology	24(2)	155-157	Journal article
985	Sharma, V., Sharma, K.K. and Sharma, N.	2011	2010-19	Amphibian	Frogs	3	No	Yes	No	Yes	Yes	1	0.33	0	0	0	0	1	0	0	0	Con	Recent threats and conservation strategies of anurans at central Aravalli foothills of Rajasthan, India	Frog Leg	17	2020-09-15	Journal article
986	Ganesh, S.R., Chandramouli, S.R., P Gowrishankar	2012	2010-19	Reptile	Snakes	3	No	Yes	No	Yes	No	0	0	0	0	0	0	0	0	0	1	OT	Record lengths of two endemic caenophidian snakes from the Western Ghats Mountains, India	Hamadryad	36(1)	14-16	Journal article
987	Kumbar, S., Ghadage, A.B., Patil, S. and Lad, S.B.	2016	2010-19	Reptile	Snakes	4	No	Yes	No	Yes	Yes	1	0.25	0	0	0	0	0	0	0	1	OT	Record of albino sand boa (Gongylophis conicus) from Sangli district, western Maharashtra, India	Russian Journal of Herpetology	23(1)	70-72	Journal article
988	Nath, A., Ahmed, F. and Singha, H.	2011	2010-19	Amphibian	Frogs	3	No	Yes	No	Yes	No	0	0	0	0	0	1	0	0	0	0	Div	Record of Kaloula assamensis (Das et al., 2004)(Anura: Microhylidae) from Bongagaon District, Assam, India	frog leg	17	22-23	Journal article
989	Chandramouli, S.R., Harikrishnan, S. and Vasudevan, K.	2012	2010-19	Reptile	Lizards	3	No	Yes	No	Yes	No	0	0	0	0	0	1	0	0	0	0	Div	Record of the Indo-Pacific Slender Gecko Hemiphyllodactylus typus (Squamata: Sauria: Gekkonidae) from the Andaman Islands, India	Journal of Threatened Taxa	4(4)	2536-2538	Journal article
990	Ganesh, S.R., Sharma, V. and Guptha, M.B.	2017	2010-19	Reptile	Snakes	3	No	Yes	No	Yes	No	0	0	0	0	0	1	0	0	0	0	Div	Records of the Indian Sand Snake Psammophis condanarus (Merrem, 1820)(Reptilia: Lamprophiidae) in southern India	Journal of Threatened Taxa	9(7)	10453-10458	Journal article
991	Seshadri, K.S., Priti, H., Ravikanth, G., Vidisha, M.K., Vineeth, K.K., Singal, R., Sarma, R.R., Aravind, N.A. and Gururaja K.V.	2016	2010-19	Amphibian	Frogs	9	No	Yes	No	Yes	Yes	3	0.33	0	0	0	1	0	0	0	0	Div	Redescription and Range Extension of Microhyla sholigari Dutta & Ray (Amphibia: Anura: Microhylidae) from South West India	Zootaxa	4208(6)	547-560	Journal article
992	Deepak, V., Harikrishnan, S., Vasudevan, K. and Smith, E.N.	2010	2010-19	Reptile	Snakes	4	No	Yes	No	Yes	No	0	0	1	0	0	1	0	0	0	0	TXDiv	Redescription of Bibron's coral snake, Calliophis bibroni Jan 1858 with notes and new records from south of the Palghat and Shencottah Gaps of the Western Ghats, India	Hamadryad	35(1)	2020-10-01	Journal article
993	Gupta, B., Prasad, N.V.S. and Veerapan, D.	2012	2010-19	Reptile	Snakes	3	No	Yes	No	Yes	No	0	0	0	0	0	1	0	0	0	0	Div	Rediscovery and range extension of Coluber bholanathi Sharma, 1976 from Seshachalam hills, Andhra Pradesh, India	Herpetology Notes	5	447-448	Journal article
994	Chandramouli, S.R.	2017	2010-19	Amphibian	Frogs	1	No	Yes	No	Yes	No	0	0	1	0	0	0	0	0	0	0	TX	Rediscovery and redescription of a little known, insular endemic frog, Ingerana charlesdarwini (Das, 1998) (Amphibia: Anura: Dicroglossidae) from the Andaman Islands, Bay of Bengal	Alytes	33	47-54	Journal article
995	Cyriac, V.P., Johny, A., Umesh, P., Palot, M.J. and Campbell, P.D.	2019	2010-19	Reptile	Lizards	5	No	Yes	No	Yes	No	0	0	1	0	0	0	0	0	0	0	TX	Rediscovery of Cnemaspis nilagirica Manamendra-Arachchi, Batuwita and Pethiyagoda, 2007 (Squamata: Gekkonidae) from Kerala, India with notes on …	Zootaxa	4586	98-108	Journal article
996	Agarwal, I., Dutta-Roy, A., Bauer, A.M. and Giri, V.B.	2012	2010-19	Reptile	Lizards	4	No	Yes	No	Yes	No	0	0	0	1	0	1	0	0	0	0	EcolDiv	Rediscovery of Geckoella jeyporensis (Squamata: Gekkonidae), with notes on morphology, coloration and habitat	Hamadryad	36(1)	17-24	Journal article
997	Litvinchuk, S., Melnikov, D., Borkin, L.J. and Hofmann, S.	2019	2010-19	Amphibian	Frogs	4	No	Yes	No	Yes	Yes	1	0.25	0	0	0	1	0	0	0	0	Div	Rediscovery of the High Altitude Lazy Toad, Scutiger occidentalis Dubois, 1978, in India	Russian Journal of Herpetology	26(1)	17-22	Journal article
998	Lalremsanga, H.T. and Hooroo, R.K.	2012	2010-19	Amphibian	Frogs	2	No	Yes	No	Yes	Yes	1	0.5	0	0	0	0	0	1	0	0	Dev	Remodeling of the intestine during metamorphosis of Microhyla berdmorei (Anura: Microhylidae)	International Multidisciplinary Research Journal	2(2)	35-40	Journal article
999	Subba, B., Ravikanth, G. and Aravind, N.A.	2015	2010-19	Amphibian	Mixed	3	Yes	No	Yes	No	Yes	1	0.33	0	0	0	1	0	0	0	0	Div	Reply to global high-altitude limits for amphibians by Tracie A. Seimon and Anton Seimon (2015)	Journal of Threatened Taxa	7(11)	7851-7852	Journal article
1000	Smart, U., Smith, E.N., Murthy, B.H.C.K. and Mohanty, A.	2014	2010-19	Reptile	Snakes	4	No	Yes	No	Yes	No	0	0	0	0	0	1	0	0	0	0	Div	Report of Nagarjunasagar Racer Coluber bholanathi Sharma, 1976 (Squamata: Serpentes: Colubridae) from the Gingee Hills, Tamil Nadu, India	Journal of Threatened Taxa	6(4)	5671-5674	Journal article
1001	Chaudhuri, A., Banerjee, A., Chowdhury, S. and Deuti, K.	2018	2010-19	Reptile	Chelonians	4	No	Yes	No	Yes	No	0	0	0	0	0	1	0	0	0	0	Div	Report of redeared slider turtle (Trachemys scripta elegans) from a wetland near Kolkata, West Bengal, India	Herpetological Bulletin	146	41-42	Journal article
1002	Ganesh, S.R. and Chandramouli, S.R.	2011	2010-19	Herpetofauna	Mixed	2	No	Yes	No	Yes	No	0	0	0	0	0	1	0	0	0	0	Div	Report of some noteworthy specimens and species of Herpetofauna from South-east India	Taprobanica: The Journal of Asian Biodiversity	3(1)	2020-10-05	Journal article
1003	Mohapatra, P.P., Dutta, S.K. and Parida, S.P.	2010	2010-19	Reptile	Snakes	3	No	Yes	No	Yes	No	0	0	0	0	0	1	0	0	0	0	Div	Report of Xenochrophis schnurrenbergeri Kramer, 1977 (Serpentes: Natricidae) from Orissa, India	Russian Journal of Herpetology	17(2)	94-96	Journal article
1004	Vyas, R.	2014	2010-19	Reptile	Snakes	1	No	Yes	No	Yes	No	0	0	0	0	0	0	0	0	0	1	OT	Report on Some Remarkable Specimens with Unusual Color Morph Recorded from Two Species of Snakes (Reptilia: Serpentes) from Gujarat, India.	Russian Journal of Herpetology	21(1)	47-52	Journal article
1005	Abraham, R.K., Mathew, J.K., Raju, D., Rao, R. and Zachariah, A.	2018	2010-19	Amphibian	Frogs	5	No	Yes	No	Yes	No	0	0	0	0	0	0	0	1	0	0	Dev	Reproduction and metamorphosis in the Myristica Swamp tree frog, Mercurana myristicapalustris (Anura: Rhacophoridae)	Peer J	6	e5934	Journal article
1006	Tripathy, B.	2016	2010-19	Reptile	Chelonians	1	No	Yes	No	Yes	No	0	0	0	1	0	0	1	0	0	0	EcolCon	Reproductive Biology and Conservation of Olive Ridley at the Rushikulya Rookery of Odisha, India.	International Journal of Conservation Science	7(4)	1105-1126	Journal article
1007	Patel, H. and Vyas, R.	2019	2010-19	Reptile	Mixed	2	No	Yes	No	Yes	No	0	0	0	0	0	1	1	0	0	0	DivCon	Reptiles of Gujarat, India: updated checklist, distribution, and conservation status	Herpetology Notes	12	765-777	Journal article
1008	Chikane, S. and Bhosale, H.	2012	2010-19	Reptile	Mixed	2	No	Yes	No	Yes	No	0	0	0	0	0	1	0	0	0	0	Div	Reptiles of Kaas, Northern Western Ghats, Maharashtra, India, with comments on their habitat and abundance	Sauria	34(3)	3	Journal article
1009	Ganesh, S.R., Chadramouli, S.R., Sreekar, R. and Shankar, P.G.	2013	2010-19	Reptile	Mixed	4	No	Yes	No	Yes	No	0	0	0	0	0	1	0	0	0	0	Div	Reptiles of the central Western Ghats, India-a reappraisal and revised checklist, with emphasis on the Agumbe Plateau	Russian Journal of Herpetology	20(3)	181-189	Journal article
1010	David, P., Agarwal, I., Athreya, R., Mathew, R., Vogel, G. and Mistry, V.K.	2015	2010-19	Reptile	Snakes	6	No	Yes	No	Yes	Yes	1	0.17	1	0	0	0	0	0	0	0	TX	Revalidation of Natrix clerki Wall, 1925, an overlooked species in the genus Amphiesma Duméril, Bibron & Duméril, 1854 (Squamata: Natricidae)	Zootaxa	3919 (2)	375–395	Journal article
1011	Vyas, R. and Stevenson, C.	2017	2010-19	Reptile	Crocodile	2	No	Yes	No	Yes	No	0	0	0	0	0	0	1	0	0	0	Con	Review and analysis of human and Mugger Crocodile conflict in Gujarat, India from 1960 to 2013	Journal of Threatened Taxa	9(12)	11016-11024	Journal article
1012	Mukhim, D.K.B., Saikia, B., Imam, I., Kharkongor, I.J., Sarma, D. and Arbenz, T.	2017	2010-19	Amphibian	Frogs	6	No	Yes	Yes	No	Yes	1	0.17	0	0	0	1	0	0	0	0	Div	Rhacophorus suffry Bordoloi, Bortamuli and Ohler, 2007-A New Record from Meghalaya, North-East India.	Journal of the Bombay Natural History Society	114	2020-08-09	Journal article
1013	Ganesh, S.R.	2010	2010-19	Herpetofauna	Mixed	1	No	Yes	No	Yes	No	0	0	0	0	0	0	0	0	0	1	OT	Richard Henry Beddome and South India's herpetofauna–a tribute on his centennial death anniversary	Cobra	4(2)	1-11	Journal article
1014	Amdekar, M.S. and Thaker, M.	2019	2010-19	Reptile	Lizards	2	Yes	No	Yes	No	Yes	2	1	0	1	1	0	0	0	1	0	EcolBHEvol	Risk of social colours in an agamid lizard: implications for the evolution of dynamic signals	Biology letters	15(5)	20190207	Journal article
1015	Vyas, R.	2014	2010-19	Reptile	Crocodile	1	No	Yes	No	Yes	No	0	0	0	0	0	0	1	0	0	0	Con	Roads and Railway: Cause for Mortality of Muggers (Crocodylus palustris), Gujarat State, India.	Russian Journal of Herpetology	21(3)	237-240	Journal article
1016	Sivaperuman, C.	2015	2010-19	Reptile	Crocodile	1	No	Yes	No	Yes	No	0	0	0	0	0	0	1	0	0	0	Con	Saltwater Crocodiles in Andaman and Nicobar Islands, with Special Reference to Human–Crocodile Conflict	Marine Faunal Diversity in India	NA	453-460	Journal article
1017	Subba, B., Ravikanth, G. and Aravind, N.A.	2015	2010-19	Amphibian	Frogs	3	Yes	No	Yes	No	Yes	1	0.333333	0	0	0	1	0	0	0	0	Div	Scaling new heights: first record of Boulenger's Lazy Toad Scutiger boulengeri (Amphibia: Anura: Megophryidae) from high altitude lake in Sikkim Himalaya, India	Journal of Threatened Taxa	7(10)	7655-7663	Journal article
1018	Devi, L.M., Thabah, C.M., Hooroo, R.N.K. and Dey, S.	2014	2010-19	Amphibian	Frogs	4	Yes	No	Yes	No	Yes	3	0.75	0	0	0	0	0	1	0	0	Dev	Scanning electron microscopic studies on the effect of pH on the gill morphology of Polypedates teraiensis hatchling (Amphibia: Anura)	Journal of Advanced Microscopy Research	9(2)	115-120	Journal article
1019	Subba, B., Ravikanth, G. and Aravind, N.A.	2016	2010-19	Amphibian	Frogs	3	Yes	No	Yes	No	Yes	1	0.333333	0	0	0	1	0	0	0	0	Div	Scutiger boulengeri (Xizang Alpine Toad). India: Sikkim	Herpetological Review	47(2)	251	Journal article
1020	Chandrasekar, K. and Srinivasan, M.	2013	2010-19	Reptile	Chelonians	2	No	Yes	No	Yes	No	0	0	0	0	0	0	1	0	0	0	Con	Sea turtle exploitation from Tamil Nadu, Southeast coast of India	Journal of Entomology and Zoology Studies	1(6)	11-14	Journal article
1021	Chandavar, V.R. and Naik, P.R.	2010	2010-19	Reptile	Chelonians	2	No	Yes	No	Yes	No	0	0	0	1	0	0	0	1	0	0	EcolDev	Seasonal variation in thyroid activity of turtle Lissemys punctata with respect to annual cycle of reproduction	Journal of Applied and Natural Science	2(2)	194-199	Journal article
1022	Subramanean, J. and Reddy, M.V.	2010	2010-19	Reptile	Lizards	2	No	Yes	No	Yes	No	0	0	0	1	0	0	0	0	0	0	Ecol	Seasonal variations in population densities of three lizard species along the Coromandel Coast, India	Hamadryad	35	37-45	Journal article
1023	Sreekar, R., Srinivasulu, C., Seetharamaraju, M. and Srinivasulu, C.A.	2010	2010-19	Reptile	Lizards	4	No	Yes	No	Yes	No	0	0	0	1	0	0	0	0	0	0	Ecol	Selection of egg attachment sites by the Indian golden gecko Calodactylodes aureus (Beddome, 1870)(Reptilia: Gekkonidae) in Andhra Pradesh, India	Journal of Threatened Taxa	2(11)	1268-1272	Journal article
1024	Seglie, D., Roy, D. and Giacoma, C.	2010	2010-19	Amphibian	Salamander	3	No	Yes	No	Yes	Yes	2	0.67	0	1	0	0	0	0	0	0	Ecol	Sexual dimorphism and age structure in a population of Tylototriton verrucosus (Amphibia: Salamandridae) from the Himalayan Region	Copeia	2010(4)	600-608	Journal article
1025	Bashir, T., Poudyal, K., Bhattacharya, T., Sambandam, S. and Subba, B.	2010	2010-19	Reptile	Snakes	5	No	Yes	No	Yes	No	0	0	0	0	0	1	0	0	0	0	Div	Sighting of King Cobra Ophiophagus hannah in Sikkim, India: a new altitude record for the northeast.	Journal of Threatened Taxa	2(6)	990-991	Journal article
1026	Batabyal, A. and Thaker, M.	2017	2010-19	Reptile	Lizards	2	Yes	No	Yes	No	Yes	2	1	0	0	1	0	0	0	0	0	BH	Signalling with physiological colours: high contrast for courtship but speed for competition	Animal Behaviour	129	229-236	Journal article
1027	Das, K.C. and Gupta, A.	2011	2010-19	Reptile	Chelonians	2	No	Yes	No	Yes	No	0	0	0	0	0	1	0	0	0	0	Div	Site records of softshell turtles (Chelonia: Trionychidae) from Barak Valley, Assam, northeastern India	Journal of Threatened Taxa	3(4)	1722-1726	Journal article
1028	Agarwal, I., Mahony, S., Giri, V.B., Chaitanya, R. and Bauer, A.M.	2018	2010-19	Reptile	Lizards	5	No	Yes	No	Yes	No	0	0	1	0	0	0	0	0	0	0	TX	Six new Cyrtodactylus (Squamata: Gekkonidae) from northeast India.	Zootaxa	4524	501-535	Journal article
1029	Ganesh, S.R., Bhupathy, S., David, P., Sathishkumar, N. and Srinivas, G.	2014	2010-19	Reptile	Snakes	5	No	Yes	No	Yes	No	0	0	1	0	0	1	1	0	0	0	TXDivCon	Snake Fauna of High Wavy Mountains, Western Ghats, India: Species Richness, Status, and Distribution Pattern.	Russian Journal of Herpetology	21(1)	53-64	Journal article
1030	Whitaker R.	2019	2010-19	Reptile	Snakes	1	No	Yes	No	Yes	No	0	0	0	0	0	0	1	0	0	0	Con	Snakebite Mitigation Project of the Madras Crocodile Bank/Centre for Herpetology, India: background and a brief summary of activities	Transactions of The Royal Society of Tropical Medicine and Hygiene	113(12)	818-819	Journal article
1031	Batabyal, A. and Thaker, M.	2019	2010-19	Reptile	Lizards	2	Yes	No	Yes	No	Yes	2	1	0	0	1	0	0	0	0	1	BHOT	Social coping styles of lizards are reactive and not proactive in urban areas	General and Comparative Endocrinology	270	67-74	Journal article
1032	Jeyabaskaran, R., Abhilash, K.S., Mohan, G., Vishnu, P.G., Mohammed, A.A., Aswathy, K.S., Khambedkar, L.R., Prema, D. and Kripa, V.	2015	2010-19	Reptile	Snakes	9	No	Yes	No	Yes	Yes	3	0.33	0	1	0	0	1	0	0	0	EcolCon	Some observations on the beaked sea snake Enhydrina schistosa (Daudin, 1803) in the mudbank area, off Alapuzha, Kerala, southwest coast of India	Journal of the Marine Biological Association of India	57(2)	109-112	Journal article
1033	Bauer, A.M., Jackman, T.R., Greenbaum, E., Giri, V.B. and Di Silva, A.	2010	2010-19	Reptile	Lizards	5	No	Yes	No	Yes	No	0	0	0	0	0	0	0	0	1	0	Evol	South Asia supports a major endemic radiation of Hemidactylus geckos	Molecular Phylogenetics and Evolution	57(1)	343-352	Journal article
1034	Choudhary, S., Choudhury, B.C. and Gopi, G.V.	2018	2010-19	Reptile	Crocodile	3	Yes	No	Yes	No	Yes	1	0.33	0	1	0	0	0	0	0	0	Ecol	Spatio‐temporal partitioning between two sympatric crocodilians (Gavialis gangeticus & Crocodylus palustris) in Katarniaghat Wildlife Sanctuary, India	Aquatic Conservation Marine and Freshwater Ecosystems	28(5)	1067-1076	Journal article
1035	Jayakumar, A.M. and Nameer, P.O.	2018	2010-19	Reptile	Mixed	2	Yes	No	No	Yes	Yes	1	0.5	0	1	0	0	0	0	0	0	Ecol	Species composition and abundance estimates of reptiles in selected agroecosystems in southern Western Ghats, India	Journal of Threatened Taxa	10(10)	12328-12336	Journal article
1036	Lalitha, R. and Chandavar, V.R.	2017	2010-19	Reptile	Chelonians	2	Yes	No	Yes	No	Yes	2	1	0	0	0	0	0	0	1	0	Evol	Species Identification Inferred through Mitochondrial 16S RRNA Gene Sequence between Freshwater Testudines-Lissemys punctata and Melanochelys trijuga.	International Journal of Advanced Research	5(7)	2231-2239	Journal article
1037	Das, I. and van Dijk, P.P.	2013	2010-19	Herpetofauna	Mixed	2	No	Yes	No	Yes	No	0	0	0	1	0	0	0	0	0	0	Ecol	Species richness and endemicity of the herpetofauna of South and Southeast Asia.	The Raffles Bulletin of Zoology	29	269-277	Journal article
1038	Ganesh, S.R. and Arumugam, M.	2016	2010-19	Herpetofauna	Mixed	2	No	Yes	No	Yes	No	0	0	0	1	0	1	0	0	0	0	EcolDiv	Species richness of montane herpetofauna of southern Eastern Ghats, India: a historical resume and a descriptive checklist.	Russian Journal of Herpetology	23(1)	7-24	Journal article
1039	Tron, R.K.L., Das, I., Hooroo, R.N.K. and Rangad, D.	2015	2010-19	Amphibian	Frogs	4	No	Yes	No	Yes	Yes	1	0.25	0	0	1	0	0	0	0	0	BH	Spring-Breeding and Reproductive Mode in Leptolalax khasiorum (Anura, Megophryidae) in North-Eastern India.	Russian Journal of Herpetology	22(3)	224-232	Journal article
1040	Guptah, M.B., Rao, P.C., Ramalingam, G., Kishore, S., Rajasekhar, M. and Kumbhar, A.	2012	2010-19	Herpetofauna	Mixed	6	No	Yes	No	Yes	No	0	0	0	0	0	1	0	0	0	0	Div	Status of Amphibians and Reptiles of Nelapattu Bird Sanctuary, Andhra Pradesh, India	World Journal of Zoology	7(4)	306-311	Journal article
1041	Guptha, M.B., Rao, P.V.C., Prasad, N.V.C., Maddala, S., Babu, P.M. and Reddy, D.S.	2012	2010-19	Herpetofauna	Mixed	6	No	Yes	No	Yes	No	0	0	0	0	0	1	0	0	0	0	Div	Status of Herpetofauna in Seshachalam Biosphere Reserve, Eastern Ghats, Andhra Pradesh, India	World Journal of Zoology	7(2)	131-134	Journal article
1042	Behera, S., Panda, A.K., Dutta, S.K. and Nayak, S.	2019	2010-19	Reptile	Chelonians	4	No	Yes	No	Yes	No	0	0	0	0	0	1	0	0	0	0	Div	Status survey of Batagur baska and Pelochelys cantorii in the state of Odisha, east coast of India	Testudo	9(1)	36-46	Journal article
1043	Mogali, S.M., Shanbhag, B.A. and Saidapur, S.K.	2015	2010-19	Amphibian	Frogs	3	No	Yes	No	Yes	Yes	1	0.333333	0	0	1	0	0	0	0	0	BH	Strong food odours mask predation risk and affect evocation of defence behaviours in the tadpoles of Sphaerotheca breviceps	Journal of Ethology	33 (1)	41-46	Journal article
1044	Roy, J.K. and Dey, M.	2015	2010-19	Herpetofauna	Mixed	2	No	Yes	No	Yes	Yes	1	0.5	0	1	0	1	0	0	0	0	EcolDiv	Studies on anuran diversity and threats to the herpetofauna on Assam University Campus, Northeast India	Hamadryad	37(1-2)	104-110	Journal article
1045	Devi, L.M., Thabah, C.M. and Hooroo, R.N.K.	2016	2010-19	Amphibian	Frogs	3	Yes	No	Yes	No	Yes	3	1	0	0	0	0	0	1	0	0	Dev	Studies on the effect of temperature on the development of anuran tadpoles Polypedates teraiensis	Journal of Science and Environment Today	UK	UK	Journal article
1046	Barley, A.J., Datta‐Roy, A., Karanth, P.K. and Brown, R.M.	2015	2010-19	Reptile	Lizards	4	No	Yes	No	Yes	No	0	0	1	0	0	0	0	0	1	0	TXEvol	Sun skink diversification across the Indian–Southeast Asian biogeographical interface	Journal of Biogeography	42	292-304	Journal article
1047	J Singh, AK Mire, B Mishra, BPS Kanwar, SL Bara, B Roopali, Smita, M Roy and S Roy	2019	2010-19	Reptile	Chelonians	9	No	Yes	No	Yes	Yes	2	0.222222	0	0	0	0	0	0	0	1	OT	Surgical management of massively large sized cloacal prolapse in an Indian star tortoise (Geochelone elegans)	Journal of Entomology and Zoology Studies	7(2)	647-649	Journal article
1048	Kharkongor, I.J., Saikia, B. and Deb, R.	2018	2010-19	Amphibian	Frogs	3	Yes	No	Yes	No	Yes	2	0.67	0	0	0	1	0	0	0	0	Div	Systematic list of Genus Megophrys Kuhl and van Hasselt, 1822 (Amphibia: Anura: Megophryidae) in Meghalaya, North-East India with a discussion on the distribution of M. wuliangshanensis Ye and Fei, 1995 in India.	Records of the Zoological Survey of India	118(1)	44-52	Journal article
1049	Garg, S., Suyesh, R., Das, A., Jiang, J., Wijayathilaka, N., Thasun A.A., Alhadi, F., Vineeth, K.K., Aravind, N.A., Senevirathne, G., Meegaskumbura, M. and Biju, S.D.	2018	2010-19	Amphibian	Frogs	12	Yes	No	No	Yes	Yes	2	0.17	1	0	0	0	0	0	0	0	TX	Systematic revision of Microhyla (Microhylidae) frogs of South Asia: a molecular, morphological, and acoustic assessment	Vertebrate Zoology	69(1)	1-71	Journal article
1050	Deepak, V., Giri, V.B., Asif, M., Dutta, S.K., Vyas, R., Zambre, A.M., Bhosale, H. and Karanth, P.K.	2016	2010-19	Reptile	Lizards	8	No	Yes	No	Yes	No	0	0	1	0	0	0	0	0	1	0	TXEvol	Systematics and phylogeny of Sitana (Reptilia: Agamidae) of Peninsular India, with the description of one new genus and five new species	Contributions to Zoology	85	67-111	Journal article
1051	Kamei, R.G., Gower, D.J., Wilkinson, M. and Biju, S.D.	2013	2010-19	Amphibian	Caecilians	4	Yes	No	No	Yes	Yes	1	0.25	1	0	0	0	0	0	0	0	TX	Systematics of the caecilian family Chikilidae (Amphibia: Gymnophiona) with the description of three new species of Chikila from northeast India	Zootaxa	3666(4)	401-435	Journal article
1052	Chakravarty, P., Bordoloi, S., Grosjean, S., Ohler, A. and Borkotoki, A.	2011	2010-19	Amphibian	Frogs	5	Yes	No	Yes	Yes	Yes	4	0.8	1	0	0	0	0	1	0	0	TXDev	Tadpole morphology and table of developmental stages of Polypedates teraiensis (Dubois, 1987)	Alytes	27(3)	85-115	Journal article
1053	Kundu, S., Das, K.C. and Ghosh, S.K.	2013	2010-19	Reptile	Chelonians	3	No	Yes	No	Yes	No	0	0	1	0	0	0	0	0	1	0	TXEvol	Taxonomic rank of Indian tortoise: revisit with DNA barcoding perspective	DNA barcodes	1	39-45	Journal article
1054	Ganesh, S.R. and Vogel, G.	2018	2010-19	Reptile	Snakes	2	No	Yes	No	Yes	No	0	0	1	0	0	0	0	0	0	0	TX	Taxonomic reassessment of the Common Indian Wolf Snakes Lycodon aulicus (Linnaeus, 1758) complex (Squamata: Serpentes: Colubridae)	Bonn Zoological Bulletin	67(1)	25-36	Journal article
1055	Ganesh, S. R., Aengals, R. and Ramanujam, E.	2014	2010-19	Reptile	Snakes	3	No	Yes	No	Yes	No	0	0	1	0	0	0	0	0	0	0	TX	Taxonomic reassessment of two Indian shieldtail snakes in the Uropeltis ceylanicus species group (Reptilia: Uropeltidae)	Journal of Threatened Taxa	6(1)	5305-5314	Journal article
1056	Chandramouli S.R. and Prasad, K.V.D.	2018	2010-19	Amphibian	Frogs	2	No	Yes	No	Yes	No	0	0	1	1	0	0	0	0	0	0	TXEcol	Taxonomic Status of the Endemic Andaman Bullfrog Kaloula baleata ghoshi Cherchi, 1954 (Anura: Microhylidae) with Notes on Distribution and Natural History	Tropical Natural History	18(1)	40–53	Journal article
1057	Deepak, V. and Vasudevan, K.	2010	2010-19	Reptile	Chelonians	2	No	Yes	No	Yes	No	0	0	0	1	0	0	0	0	0	0	Ecol	Telemetry study on two endemic turtle species in the Western Ghats	ENVIS Bulletin: Wildlife and Protected Areas	12(1)	177	Journal article
1058	Ramakrishna, S., Jayashankar, M., Alexander, R. and Avinash, K.	2014	2010-19	Reptile	Chelonians	3	No	Yes	No	Yes	No	0	0	0	0	0	1	1	0	0	0	DivCon	Testudines of India: a review on diversity, threats and conservation initiatives	International Journal of Pharmacy and Life Sciences	5 (2)	3297-3340	Journal article
1059	Kundu, S., Kumar, V., Tyagi, K. and Chandra, K.	2019	2010-19	Reptile	Chelonians	4	No	Yes	No	Yes	No	0	0	0	0	0	0	0	0	1	0	Evol	The complete mitochondrial genome of endangered Assam Roofed Turtle, Pangshura sylhetensis (Testudines: Geoemydidae): Genomic features and Phylogeny	PLoS ONE	15(4)	e0225233	Journal article
1060	Lajmi, A., Datta-Roy, A., Vyas, R., Agarwal, I. and Karanth, P.	2018	2010-19	Reptile	Lizards	5	Yes	No	Yes	No	Yes	1	0.2	1	0	0	1	0	0	0	0	TXDiv	The curious case of Hemidactylus gujaratensis (Squamata: Gekkonidae).	Zootaxa	4388	137-142	Journal article
1061	Surendran, H. and Vasudevan, K.	2015	2010-19	Herpetofauna	Mixed	2	No	Yes	No	Yes	No	0	0	0	1	0	0	0	0	0	0	Ecol	The devil is in the detail: estimating species richness, density, and relative abundance of tropical island herpetofauna	BMC Ecology	15(1)	1-9	Journal article
1062	Kundu, S., Kumar, V., Tyagi, K., Chakraborty, R., Rahaman, I. and Chandra, K.	2019	2010-19	Reptile	Chelonians	6	No	Yes	No	Yes	No	0	0	0	0	0	0	0	0	1	0	Evol	The first complete mitochondrial genome of the Indian Tent Turtle, Pangshura tentoria (Testudines: Geoemydidae): Characterization and comparative analysis.	Ecology and evolution	9(18)	10854-10868	Journal article
1063	Agarwal, I., Wilkinson, M., Mohapatra, P.P., Dutta, S.K., Giri, V.B. and Gower, D.J.	2013	2010-19	Amphibian	Caecilians	6	No	Yes	No	Yes	No	0	0	1	0	0	0	0	0	0	0	TX	The first teresomatan caecilian (Amphibia: Gymnophiona) from the Eastern Ghats of India—a new species of Gegeneophis Peters, 1880	Zootaxa	3693(4)	534-546	Journal article
1064	Agarwal, I., Khandekar, A., Giri, V.B., Ramakrishnan, U. and Karanth, P.K.	2019	2010-19	Reptile	Lizards	4	No	Yes	No	Yes	Yes	1	0.25	1	0	0	0	0	0	1	0	TXEvol	The hills are alive with geckos! A radiation of a dozen species on sky islands across peninsular India (Squamata: Gekkonidae, Hemiphyllodactylus) with the …	Organism, Diversity and Evolution	19	341-361	Journal article
1065	Ganesh, S.R.	2018	2010-19	Reptile	Lizards	1	No	Yes	No	Yes	No	0	0	1	0	0	1	0	0	0	0	TXDiv	The rediscovery of Rurk's Cat Skink Ristella rurkii Gray, 1839 (Reptilia: Ristellidae) with remarks on distribution and natural history	Journal of Threatened Taxa	10	12376-12381	Journal article
1066	Gower, D.J., Agarwal, I., Karanth, P., Dutta-Roy, A., Giri, V.B., Wilkinson, M. and San Mauro, D.	2016	2010-19	Amphibian	Caecilians	7	No	Yes	No	Yes	No	0	0	0	0	0	0	0	0	1	0	Evol	The role of wet‐zone fragmentation in shaping biodiversity patterns in peninsular India: insights from the caecilian amphibian Gegeneophis	Journal of Biogeography	43(6)	1091-1102	Journal article
1067	Farhad, A. and Varsha, W.	2013	2010-19	Reptile	Snakes	2	No	Yes	No	Yes	Yes	1	0.5	0	0	0	1	0	0	0	0	Div	The snake fauna of Mulshi Taluka, Pune District, India	Russian Journal of Herpetology	20(1)	16-18	Journal article
1068	Basumatary, R. and Sharma, D.K.	2013	2010-19	Reptile	Chelonians	2	No	Yes	No	Yes	No	0	0	0	1	0	1	0	0	0	0	EcolDiv	The turtle fauna of Kaziranga National Park, Assam, India with notes on natural history and conservation status	Herpetology Notes	6	59-72	Journal article
1069	Pratihar, S.	2014	2010-19	Amphibian	Frogs	1	No	Yes	No	Yes	No	0	0	1	0	0	0	0	0	0	0	TX	Threatened species of Bush frogs of the genus Raorchestes (Amphibia: Anura) in India	Hyla: Herpetological bulletin	2014(2)	34-40	Journal article
1070	Lalremsanga, H.T. and Khawlhring, L.	2010	2010-19	Reptile	Lizards	2	No	Yes	No	Yes	No	0	0	0	0	0	1	0	0	0	0	Div	Three additional lizard (Squamata: Sauria) records for Mizoram, India	Journal of Threatened Taxa	2(2)	718-720	Journal article
1071	Chettri, B. and Bhupathy, S.	2010	2010-19	Reptile	Mixed	2	Yes	No	Yes	Yes	Yes	1	0.5	0	0	0	1	0	0	0	0	Div	Three little known reptile species from the Araku Valley, Eastern Ghats with notes on their distribution	Journal of Threatened Taxa	2(8)	1109-1113	Journal article
1072	Mahony, S., Teeling, E.C. and Biju, S.D.	2013	2010-19	Amphibian	Frogs	3	No	Yes	No	Yes	Yes	1	0.333333	1	0	0	0	0	0	0	0	TX	Three new species of horned frogs, Megophrys (Amphibia: Megophryidae), from northeast India, with a resolution to the identity of Megophrys boettgeri populations reported from the region	Zootaxa	3722(2)	143-169	Journal article
1073	Sarkar, H. and Maiti, B.R.	2011	2010-19	Reptile	Chelonians	2	No	Yes	No	Yes	No	0	0	0	0	0	0	0	1	0	0	Dev	Tinctorial, immunocytochemical and ultrastructural characterizations of the endocrine cell types of the pancreas of the soft-shelled turtle, Lissemys punctata punctata (Bonnoterre) (Reptilia: Chelonia)	Italian Journal of Zoology	78(4)	427-443	Journal article
1074	Das, K.C., Kundu, S., Ghosh, S.K. and Gupta, A.	2012	2010-19	Reptile	Chelonians	4	No	Yes	No	Yes	No	0	0	0	0	0	0	1	0	0	0	Con	Traditional knowledge on zootherapeutic uses of turtle is an issue for international conservation	Recent Advances in Natural Products Research	16	81-89	Journal article
1075	Khandekar, A., Thackeray, T. and Agarwal, I.	2019	2010-19	Reptile	Lizards	3	No	Yes	No	Yes	No	0	0	1	0	0	0	0	0	0	0	TX	Two more new species of Cnemaspis Strauch, 1887 (Squamata: Gekkonidae) from the northern Western Ghats, Maharashtra, India.	Zootaxa	4656	43-70	Journal article
1076	Khandekar, A., Gaitonde, N. and Agarwal, I.	2019	2010-19	Reptile	Lizards	3	No	Yes	No	Yes	No	0	0	1	0	0	0	0	0	0	0	TX	Two new Cnemaspis Strauch, 1887 (Squamata: Gekkonidae) from the Shevaroy massif, Tamil Nadu, India, with a preliminary ND2 phylogeny of Indian …	Zootaxa	4609	68-100	Journal article
1077	Agarwal, I., Mahony, S., Giri, V.B., Chaitanya, R. and Bauer, A.M.	2018	2010-19	Reptile	Lizards	5	No	Yes	No	Yes	No	0	0	1	0	0	0	0	0	0	0	TX	Two new species of bent toed geckos, Cyrtodactylus Gray, 1827 (Squamata: Gekkonidae) from Northeast India with comments on name-bearing types from the region.	Zootaxa	4420	334-356	Journal article
1078	Raj, P., Dinesh, K.P., Das, A., Dutta, S.K., Kar, N.B. and Mohapatra, P.P.	2018	2010-19	Amphibian	Frogs	6	No	Yes	No	Yes	No	0	0	1	0	0	0	0	0	0	0	TX	Two new species of cricket frogs of the genus Fejervarya Bolkay, 1915 (Anura: Dicroglossidae) from the Peninsular India	Records of the Zoological Survey of India	118(1)	2020-01-21	Journal article
1079	Agarwal, I.	2016	2010-19	Reptile	Lizards	1	No	Yes	No	Yes	No	0	0	1	0	0	0	0	0	0	0	TX	Two new species of ground-dwelling Cyrtodactylus (Geckoella) from the Mysore Plateau, south India.	Zootaxa	4193	228-244	Journal article
1080	Agarwal, I., Khandekar, A., Ramakrishnan, U., Vyas, R. and Giri, V.B.	2018	2010-19	Reptile	Lizards	5	No	Yes	No	Yes	Yes	1	0.2	1	0	0	0	0	0	0	0	TX	Two new species of the Ophisops microlepis (Squamata: Lacertidae) complex from northwestern India with a key to Indian Ophisops	Journal of Natural History	52	819-847	Journal article
1081	Abraham, R.K., Pyron, R.A., Ansil, B.R., Zachariah, A. and Zachariah, A.	2013	2010-19	Amphibian	Frogs	5	No	Yes	No	Yes	No	0	0	1	0	0	0	0	0	0	0	TX	Two novel genera and one new species of treefrog (Anura: Rhacophoridae) highlight cryptic diversity in the Western Ghats of India	Zootaxa	3640(2)	177-189	Journal article
1082	Senevirathne, G., Garg, S., Kerney, R., Meegaskumbura, M. and Biju, S.D.	2016	2010-19	Amphibian	Frogs	5	Yes	No	No	Yes	Yes	2	0.4	1	1	0	0	0	0	0	0	TXEcol	Unearthing the fossorial tadpoles of the Indian dancing frog family Micrixalidae	PLoS ONE	11 (3)	e0151781	Journal article
1083	Aengals, R., Kumar, V.M.S. and Palot, M.J.	2011	2010-19	Reptile	Mixed	3	No	Yes	No	Yes	No	0	0	0	0	0	1	0	0	0	0	Div	Updated checklist of Indian reptiles	Zoological Survey of India	NA	NA	Journal article
1084	Purkayastha, J., Das, M. and Sengupta, S.	2011	2010-19	Herpetofauna	Mixed	3	No	Yes	No	Yes	Yes	1	0.33	0	0	0	1	0	0	0	0	Div	Urban herpetofauna: a case study in Guwahati City of Assam, India	Herpetology Notes	4	195-202	Journal article
1085	Bhaskar, R. and Mohindra, V.	2018	2010-19	Reptile	Chelonians	2	Yes	No	Yes	No	Yes	2	1	0	0	0	0	0	0	1	0	Evol	Variability in DNA COI sequences reveals new haplotypes in freshwater turtles from northern region of India	Mitochondrial DNA Part B	3(1)	317-323	Journal article
1086	Narayanan, A.	2016	2010-19	Reptile	Chelonians	1	No	Yes	No	Yes	No	0	0	0	1	0	0	0	0	0	0	Ecol	Variation in allometric shell growth and relationship with sexual size dimorphism in repatriated Indian star tortoises (Geochelone elegans)(Reptilia: Testudinidae)	Current Science	110(2)	206-213	Journal article
1087	Sirsi, S., Singh, S., Tripathi, A., McCracken, S.F., Forstner, M.R.J. and Horne, B.D.	2017	2010-19	Reptile	Chelonians	6	No	Yes	No	Yes	No	0	0	0	1	0	0	0	0	0	0	Ecol	Variation in Reproductive Output of the Red-crowned Roofed Turtle (Batagur kachuga) and the Three-striped Roofed Turtle (Batagur dhongoka) in the Chambal River of North India	Chelonian Conservation and Biology	16(2)	203-214	Journal article
1088	Thomas, A., Suyesh, R., Biju, S.D. and Bee, M.A.	2014	2010-19	Amphibian	Frogs	4	No	Yes	No	Yes	No	0	0	0	0	1	0	0	0	0	0	BH	Vocal behavior of the elusive purple frog of India (Nasikabatrachus sahyadrensis), a fossorial species endemic to the Western Ghats	PLoS ONE	9(2)	e94121	Journal article
1089	Bee, M.A., Suyesh, R. and Biju, S.D.	2013	2010-19	Amphibian	Frogs	3	No	Yes	No	Yes	No	0	0	0	0	1	0	0	0	0	0	BH	Vocal Behavior of the Ponmudi Bush Frog (Raorchestes graminirupes): Repertoire and Individual Variation	Herpetologica	69(1)	22-35	Journal article
1090	Mohanty, N.P., Harikrishnan, S. and Vasudevan, K.	2016	2010-19	Reptile	Lizards	3	No	Yes	No	Yes	No	0	0	0	0	1	0	0	0	0	0	BH	Watch out where you sleep: nocturnal sleeping behaviour of Bay Island lizards	PeerJ	4	e1856	Journal article
1091	Thaker, M., Zambre, A. and Bhosale, H.	2018	2010-19	Reptile	Lizards	3	Yes	No	Yes	No	Yes	1	0.333333	0	1	0	0	1	0	0	0	EcolCon	Wind farms have cascading impacts on ecosystems across trophic levels	Nature Ecology and Evolution	2	1854-1858	Journal article
1092	Behera, S., Tripathy, B. and Choudhury, B.C.	2015	2010-19	Reptile	Chelonians	3	No	Yes	No	Yes	No	0	0	0	1	0	0	1	0	0	0	EcolCon	World's largest olive ridley turtles Lepidochelys olivacea nesting grounds: Gahirmatha rookery now uncertain for arribada in future, East Coast of India	Herpetological Bulletin	130	18-20	Journal article
1093	Murthy, T.S.N.	1977	1970-79	Herpetofauna	Mixed	1	No	Yes	No	Yes	No	0	0	0	0	0	1	0	0	0	0	Div	The herpetofauna of Madras and its vicinity	Newsletter of the Zoological Survey of India	3(6)	372-378	Newsletter
1094	Vijaya, J.	1982	1980-89	Reptile	Chelonians	1	Yes	No	Yes	No	Yes	1	1	0	0	0	0	1	0	0	0	Con	Turtle slaughter in India	Marine Turtle Newsletter	23	6	Newsletter
1095	Moll, E., Bhaskar, S. and Vijaya, J.	1983	1980-89	Reptile	Chelonians	3	No	Yes	Yes	Yes	Yes	1	0.33	0	0	0	1	0	0	0	0	Div	Update on the Olive Ridley on the East Coast of India	Marine Turtle Newsletter	25	2-4	Newsletter
1096	Roy, D.	1996	1990-99	Amphibian	Frogs	1	Yes	No	Yes	No	Yes	1	1	0	0	1	0	0	0	0	0	BH	Courtship in frogs	Resonance	1(12)	39-48	Newsletter
1097	Dutta, S.K.	1990	1990-99	Herpetofauna	Mixed	1	No	Yes	No	Yes	No	0	0	0	1	0	0	0	0	0	0	Ecol	Ecology, natural history and conservation of herpetofauna of Orissa, India	Tigerpaper (Bangkok)	17(3)	20-28	Newsletter
1098	Gomathi, N., Singh, R.	2007	2000-09	Reptile	Chelonians	2	No	Yes	No	Yes	No	0	0	0	1	0	0	0	0	0	0	Ecol	A note on the feeding habits of Indian Softshell turtle Aspideretes gangeticus in keoladeo national park	Reptile Rap	8	2020-06-05	Newsletter
1099	Das, A., Ahmed, M.F., Lahkar, B.P. and Sharma, P.	2007	2000-09	Reptile	Mixed	4	No	Yes	No	Yes	No	0	0	0	0	0	0	1	0	0	0	Con	A preliminary report of reptilian mortality on road due to vehicular movement near Kaziranga National Park, Assam, India	Zoos' Print	22(7)	2742-2744	Newsletter
1100	Vyas, R.	2000	2000-09	Reptile	Chelonians	1	No	Yes	No	Yes	No	0	0	0	0	0	0	0	0	0	1	OT	A review of reptile studies in Gujarat State	Zoos' Print	15(12)	386-390	Newsletter
1101	Siliwal, M., Dhuru, S., Balakrishnan, S. Naik, Y. and Pilo, B.	2003	2000-09	Reptile	Chelonians	5	Yes	No	Yes	No	Yes	2	0.4	0	0	0	1	0	0	0	0	Div	Amphibians of Purna Wildlife Sanctuary, Dangs, Gujarat	Zoos' Print	18	1157-1158	Newsletter
1102	Chandra, K. and Gajbe, P.U.	2005	2000-09	Herpetofauna	Mixed	2	No	Yes	No	Yes	No	0	0	0	0	0	1	0	0	0	0	Div	An inventory of herpetofauna of Madhya Pradesh and Chhattisgarh	Zoos' Print	20(3)	1812-1819	Newsletter
1103	Vyas, R.	2005	2000-09	Reptile	Chelonians	1	No	Yes	No	Yes	No	0	0	0	0	0	0	1	0	0	1	ConOT	Captive breeding of the Indian star tortoise (Geochelone elegans)	Zoos' Print	20(5)	1859-1864	Newsletter
1104	Saikia, U., Sharma, D.K. and Sharma, R.M.	2007	2000-09	Reptile	Mixed	3	No	Yes	No	Yes	No	0	0	0	0	0	1	0	0	0	0	Div	Checklist of the reptilian fauna of Himachal Pradesh, India	Reptile Rap	8	2020-09-06	Newsletter
1105	Vyas, R.	2007	2000-09	Herpetofauna	Mixed	1	No	Yes	No	Yes	No	0	0	0	0	0	1	0	0	0	0	Div	Herpetofauna of Purna Wildlife Sanctuary, Gujarat, India	Reptile Rap	8	10-14	Newsletter
1106	Shanker K. and Pilcher, N.J.	2003	2000-09	Reptile	Chelonians	2	No	Yes	No	Yes	No	0	0	0	0	0	0	1	0	0	0	Con	Marine turtle conservation in South and Southeast Asia: hopeless cause or cause for hope	Marine Turtle Newsletter	100	43-51	Newsletter
1107	Giri, V.B. and Chaturvedi, N.	2001	2000-09	Herpetofauna	Mixed	2	No	Yes	No	Yes	No	0	0	0	0	0	1	0	0	0	0	Div	Preliminary survey of the herpetofauna in the Western Ghats region of Maharashtra	Tigerpaper (Bangkok)	8	1-7	Newsletter
1108	Baruah, C. and Sharma, D.K.	2009	2000-09	Reptile	Chelonians	2	No	Yes	No	Yes	No	0	0	0	0	0	1	0	0	0	0	Div	Software for exploring the turtle and tortoise diversity of northeast India	Turtle and Tortoise Newsletter	13	9-10	Newsletter
1109	Das, A. and M. Ahmed, M.F.	2007	2000-09	Reptile	Lizards	2	No	Yes	No	Yes	No	0	0	0	0	0	1	0	0	0	0	Div	Range Extension of Assamese Day Gekko Cnemaspis assamensis Das and Sengupta (Sauria: Gekkonidae)	Zoos' Print	22(6)	2720	Newsletter
1110	Roy, D., Choudhury, A. and Borah, B.	2004	2000-09	Amphibian	Frogs	3	Yes	No	Yes	No	Yes	2	0.67	0	0	1	0	0	0	0	0	BH	Role of weather condition on the daily appearance and advertisement call initiation time of Polypedates leucomystax during the breeding season	Zoos' Print	19(3)	1408-1410	Newsletter
1111	Kumar, G.C. and Srinivasulu, C.	2015	2010-19	Reptile	Lizards	2	No	Yes	No	Yes	No	0	0	0	0	0	0	1	0	0	0	Con	Impact of vehicular traffic on Kashmir Rock Agama Laudakia tuberculata (Gary, 1827) near Kalatop-Khajjiar Wildlife Sanctuary, Chamba, Himachal Pradesh, India	Reptile Rap	17	44-46	Newsletter
1112	Prachi, H. and Ramesh, C.	2016	2010-19	Reptile	Snakes	2	Yes	No	No	Yes	Yes	1	0.5	0	0	0	0	1	0	0	0	Con	A comprehensive report on the Hook-nosed Sea Snake Enhydrina schistosa (Daudin, 1803)	Reptile Rap	30	19-22	Newsletter
1113	Kanagavel, A., Sekar, R., Whitaker, N. and Raghavan, R.	2012	2010-19	Reptile	Snakes	4	No	Yes	No	Yes	No	0	0	0	0	0	0	0	0	0	1	OT	A Malabar Pit Viper, Trimeresurus malabaricus (Jerdon, 1854) morph from the southern Western Ghats	Reptile Rap	14	27-28	Newsletter
1114	Kanagavel, A.	2013	2010-19	Reptile	Chelonians	1	No	Yes	No	Yes	No	0	0	0	0	0	1	0	0	0	0	Div	A new record of the Cochin Forest Cane Turtle Vijayachelys silvatica (Henderson, 1912) from Shendurney Wildlife Sanctuary, Kerala, India	Reptile Rap	15	3-6	Newsletter
1115	Thakur, S.	2011	2010-19	Reptile	Snakes	1	No	Yes	No	Yes	No	0	0	0	0	0	1	0	0	0	0	Div	A note on snakes of Kanha National Park and surrounding areas	Reptile Rap	11	2020-05-02	Newsletter
1116	Gayathri, S.A., Jayashankar, M. and Avinash, K.	2016	2010-19	Herpetofauna	Mixed	3	Yes	No	Yes	Yes	Yes	1	0.33	0	0	0	1	0	0	0	0	Div	A pilot-survey to assess the diversity and distribution of reptilian fauna in Taralu Village, abutting the Bannerghatta National Park, Karnataka, India	Reptile Rap	18	3-18	Newsletter
1117	Kundu, S., Mehra, G.S., Bisht, D. and Badola, S.	2016	2010-19	Reptile	Snakes	4	No	Yes	No	Yes	Yes	1	0.25	0	0	0	0	0	0	0	1	OT	A record of a 1,244mm long Common Krait Bungarus caeruleus (Schneider, 1801) from Dhangarhi, Corbett Tiger Reserve, Uttarakhand, India	Reptile Rap	18	51-52	Newsletter
1118	Kachhawa, Y., Kachhawa, D., Kumawat, R.K., Sharma, K.K. and Sharma, V.	2016	2010-19	Reptile	Snakes	5	No	Yes	No	Yes	Yes	1	0.2	0	0	0	1	0	0	0	0	Div	A sighting of the Sind Awl-headed Snake Lytorhynchus paradoxus (Günther, 1875) from western Rajasthan: Habitat preferences	Reptile Rap	18	23-24	Newsletter
1119	Yankanchi, S.R. and Kumbar, S.M.	2016	2010-19	Reptile	Lizards	2	No	Yes	No	Yes	No	0	0	0	0	0	0	0	1	0	0	Dev	Bifid tail in Hemidactylus prashadi (Smith, 1935)	Reptile Rap	18	34-35	Newsletter
1120	Adimallaiah, D. and Vyas, A.	2015	2010-19	Reptile	Snakes	2	No	Yes	No	Yes	No	0	0	0	0	0	0	0	0	0	1	OT	Cases of albinism in Russel's Viper Daboia russelii from Mumbai, Maharashtra, India	Reptile Rap	17	25-26	Newsletter
1121	Bhutkar, R. and Mahabal, A.	2014	2010-19	Reptile	Snakes	2	No	Yes	No	Yes	No	0	0	0	0	0	0	0	0	0	1	OT	Cases of albinism in snakes from Maharashtra, India	Reptile Rap	16	31-35	Newsletter
1122	Hoshing, V. and Mahabal, S.T.A.	2013	2010-19	Reptile	Snakes	2	No	Yes	No	Yes	No	0	0	0	0	0	0	0	0	0	1	OT	Cases of total albinism in green keelback Macropisthodon plumbicolor and common wolf snake Lycodon aulicus (Colubridae)	Reptile Rap	15	46-47	Newsletter
1123	Patel, H. and Tank, S.K.	2014	2010-19	Reptile	Snakes	2	No	Yes	No	Yes	No	0	0	0	0	0	0	0	0	0	1	OT	Cases of unusual colour morph in Russell's Viper Daboia russelii (Shaw & Nodder, 1797) from Gujarat, India	Reptile Rap	16	27-30	Newsletter
1124	Solanki, R., Pande, A., Vasava, A., Singh, A. and Bipin, C.M.	2015	2010-19	Herpetofauna	Mixed	5	Yes	No	Yes	No	Yes	2	0.4	0	0	0	1	0	0	0	0	Div	Contributions to Herpetofauna of Jaisalmer District-some photographic records	Reptile Rap	17	50-55	Newsletter
1125	Atigre, R.H., Patil, S.R. and Babare, M.G.	2015	2010-19	Reptile	Crocodile	3	No	Yes	No	Yes	No	0	0	0	1	0	0	0	0	0	0	Ecol	Counting of probable basking sites of Mugger Crocodile Crocodylus palustris (Lesson, 1831) from Warana Basin, Western Maharashtra, India	Reptile Rap	17	27-29	Newsletter
1126	Narayana, B.L., Baburao, G. and Rao, V.V.	2016	2010-19	Reptile	Lizards	3	No	Yes	No	Yes	No	0	0	0	0	0	1	0	0	0	0	Div	Distribution of Treutler’s Gecko (Hemidactylus treutleri Mahony, 2009) in Telangana and Andhra Pradesh, southern India - a general information	Reptile Rap	16	25-28	Newsletter
1127	Ingle, M.	2010	2010-19	REptile	Snakes	1	No	Yes	No	Yes	No	0	0	0	0	0	1	0	0	0	0	Div	First locality record of Chrysopelea ornata Shaw, 1802 from Kheonae Wildlife Sanctuary, Dewas, Madhya Pradesh	Reptile Rap	10	2020-06-05	Newsletter
1128	Narasimmarajan, K. and Mahato, S.	2013	2010-19	Reptile	Lizards	2	No	Yes	No	Yes	No	0	0	0	0	0	1	0	0	0	0	Div	First Record of Lined Supple Skink Lygosoma lineata (Gray, 1839) from Melghat Tiger Reserve, Maharashtra	Reptile Rap	15	9-19	Newsletter
1129	Pandirkar, A., Karve, H., Ghadigaonkar, P., Todankar, R., Kuwar, A., Jangam, P., Bandekar, P. and Mahangade, A.	2015	2010-19	Reptile	Snakes	8	No	Yes	No	Yes	No	0	0	0	0	0	0	0	0	0	1	OT	First record of scavenging by Oligodon arnensis (shaw, 1802) from Tungareshwar Wildlife Sanctuary, India	Reptile Rap	17	19-21	Newsletter
1130	Shine, G. and Nameer, P.O.	2012	2010-19	Reptile	Snakes	2	No	Yes	No	Yes	No	0	0	0	0	0	1	0	0	0	0	Div	First record of Slender Coral Snake Calliophis melanurus (Shaw, 1802) south of the Palghat Gap, Western Ghats	Reptile Rap	14	2020-03-01	Newsletter
1131	Walmiki, N.S., Karangutkar, S., Jadhav, A., Parab, S, and Srikanthan, A.N.	2011	2010-19	Reptile	Snakes	4	No	Yes	No	Yes	No	0	0	0	0	0	1	0	0	0	0	Div	First record of Yellow-spotted Wolf Snake Lycodon flavomaculatus (Wall,1907) from Chirner Forest, Uran,Maharashtra	Reptile Rap	12	2020-03-02	Newsletter
1132	Deshmukh, R.V., Deshmukh, S.A. and Badhekar, S.A.	2016	2010-19	Reptile	Snakes	3	No	Yes	No	Yes	No	0	0	0	0	0	1	0	0	0	0	Div	First records of Oligodon taeniolatus and Bungarus sindnus walli from Nagpur District, Maharashtra, India	Reptile Rap	18	40-42	Newsletter
1133	Vyas, R., Parasharya, B.M. and Jani. J.J.	2012	2010-19	Herpetofauna	Mixed	3	No	Yes	No	Yes	No	0	0	0	0	0	1	0	0	0	0	Div	Herpetofaunal diversity in and around the selected man-made wetlands of central and northern Gujarat, India	Reptile Rap	14	21-26	Newsletter
1134	Ramesh, C., Nehru, P., Vishnu, S.N., Karthy, S., Murugan, V.T., Das, A. and Taluktar, G.	2019	2010-19	Reptile	Snakes	7	No	Yes	No	Yes	No	0	0	0	0	1	0	0	0	0	0	BH	Indian Rock Python: mating behaviour of Python molurus molurus (Linnaeus, 1758) in Moyar River Valley, Tamil Nadu, India	Reptile Rap	34(2)	10-14	Newsletter
1135	Islam, M., and Saikia, P.K.	2013	2010-19	Reptile	Lizards	2	No	Yes	No	Yes	No	0	0	0	0	0	1	0	0	0	0	Div	Inventory and Natural History of Lizards in Jeypore Reserve Forest, Assam	Reptile Rap	15	16-26	Newsletter
1136	Vyas, R.	2015	2010-19	Reptile	Chelonians	1	No	Yes	No	Yes	No	0	0	0	0	0	0	1	0	0	0	Con	Jeopardized future of Indian Star tortoise Geochelone elegans	Reptile Rap	17	13-18	Newsletter
1137	Mirza Z.A. and Sanap, R.	2010	2010-19	Reptile	Lizards	2	No	Yes	No	Yes	No	0	0	0	0	0	1	0	0	0	0	Div	New locality record of Hemidactylus gracilis Blanford, 1870 (Squamata: Sauria: Gekkonidae) from Nashik District, Maharashtra	Reptile Rap	10	2020-03-02	Newsletter
1138	Anne, S. and Visvanathan, A.C.	2018	2010-19	Reptile	Snakes	2	No	Yes	No	Yes	No	0	0	0	0	0	1	0	0	0	0	Div	New locality record of Lycodon flavomaculatus Wall, 1907 from Telangana, India	Reptile Rap	33(4)	12-14	Newsletter
1139	Guptha, M.B., Rao, P.V.C., Reddy, D.S., Babu, P.M. and Manddala, S.R.S.C.	2013	2010-19	Reptile	Snakes	5	No	Yes	No	Yes	No	0	0	0	0	0	1	0	0	0	0	Div	New Record of Elliot's Shieldtail (Gray, 1858) in Seshachalam Biosphere Reserve, Eastern Ghats, Andhra Pradesh, India	Reptile Rap	15	2020-08-07	Newsletter
1140	Vyas, R.	2013	2010-19	Reptile	Snakes	1	No	Yes	No	Yes	No	0	0	0	1	0	0	0	0	0	0	Ecol	Note on an unusual colour morphism in Oriental Rat Snake Ptyas muscosa (Linnaeus, 1758)	Reptile Rap	15	43-45	Newsletter
1141	Vyas, R.	2016	2010-19	Reptile	Snakes	1	No	Yes	No	Yes	No	0	0	0	0	0	0	0	0	0	1	OT	Note on record of body length of the Common Wolf Snake Lycodon aulicus	Reptile Rap	18	31-32	Newsletter
1142	Bhatnagar, C. and Mahur, M.	2010	2010-19	Reptile	Crocodile	2	Yes	No	Yes	No	Yes	2	1	0	0	1	0	0	0	0	0	BH	Observations on feeding behavior of a wild population of marsh crocodile in Baghdarrah Lake, Udaipur, Rajasthan	Reptile Rap	10	16-18	Newsletter
1143	Cyriac, V.P., Arjub, C.P. and Tijo, K.J.	2011	2010-19	Reptile	Lizards	3	No	Yes	No	Yes	No	0	0	0	0	0	1	0	0	0	0	Div	Occurrence of the Anaimalai Gecko Hemidactylus anamallensis Gunther, 1875 from Chembra, Wayanad, Kerala	Malabar Trogon	9(3)	20-21	Newsletter
1144	Narayanan, S.	2016	2010-19	Reptile	Snakes	1	No	Yes	No	Yes	No	0	0	0	0	0	1	0	0	0	0	Div	On the occurrence of the Calamaria Reed Snake Liopeltis calamaria (Günther, 1858)(Squamata: Colubridae), in the Kalakadu Mundanthurai Tiger Reserve	Reptile Rap	18	29-30	Newsletter
1145	Ranade, S.P.	2015	2010-19	Reptile	Lizards	1	No	Yes	No	Yes	No	0	0	0	1	0	0	0	0	0	0	Ecol	On the predation of Gekko gecko (Linnaeus 1758)(Squamata: Gekkonidae) by an Orb Spider of genus Parawixia FOP Cambridge 1904 (Araneae: Araneidae)	Reptile Rap	17	56-58	Newsletter
1146	Kumar, P.S., Princy, J.L. and Kannan, P.	2017	2010-19	Reptile	Lizards	3	No	Yes	No	Yes	Yes	1	0.333333	0	1	1	0	0	0	0	0	EcolBH	Opportunistic feeding behaviour of an endemic lizard Salea horsfieldii	Reptile Rap	32	20-21	Newsletter
1147	Reddy, Y.A., Pal, A., Pullaiah, T., Sadasivaiah, B., Raja, K.S. and Rani, S.S.	2013	2010-19	Reptile	Lizards	6	No	Yes	No	Yes	Yes	2	0.33	0	0	0	1	0	0	0	0	Div	Range extension of Indian Golden Gecko Calodactylodes aureus in Andhra Pradesh, India	Reptile Rap	15	41-42	Newsletter
1148	Prakash, S., Mohammad, R. and Mishra, A.K.	2014	2010-19	Reptile	Lizards	3	No	Yes	No	Yes	No	0	0	0	0	0	1	0	0	0	0	Div	Record of East Indian Leopard Gecko Eublepharis hardwickii Gray, 1827 (Squamata: Sauria: Eublepharidae) from Hazaribag, Jharkhand, India	Reptile Rap	16	24-26	Newsletter
1149	Vyas, R.	2010	2010-19	Reptile	Lizards	1	No	Yes	No	Yes	No	0	0	0	0	0	1	0	0	0	0	Div	Record of Lygosoma albopunctata Gray, 1846 from Vansda forest and comments on its distribution in Gujarat state	Reptile Rap	10	2020-05-04	Newsletter
1150	Mukherjee, A.	2015	2010-19	Reptile	Snakes	1	Yes	No	Yes	No	Yes	1	1	0	0	0	1	0	0	0	0	Div	Record of Spalerosophis atriceps (Fischer, 1885) from Keoladeo National Park, Bharatpur, Rajasthan	Reptile Rap	17	22-24	Newsletter
1151	Narayanan, A.	2012	2010-19	Reptile	Snakes	1	No	Yes	No	Yes	No	0	0	0	0	0	1	0	0	0	0	Div	Records of Indian egg eater snake Elachistodon westermanni in the localities of Shegaon, District Buldhana, Maharashtra, India	Reptile Rap	14	2020-12-09	Newsletter
1152	Vyas, R.	2011	2010-19	Reptile	Mixed	1	No	Yes	No	Yes	No	0	0	0	0	0	1	0	0	0	0	Div	Reptilian diversity in and around the Shoolpaneshwar Wildlife Sanctuary, Gujarat, India	Reptile Rap	11	5-15	Newsletter
1153	Tsetan, C. and Ramanibai, R.	2011	2010-19	Reptile	Mixed	2	No	Yes	Yes	No	Yes	1	0.5	0	0	0	1	0	0	0	0	Div	Reptilian fauna of agricultural landscapes of Chembarambakkam Lake, Chennai, Tamil Nadu	Reptile Rap	13	2020-08-02	Newsletter
1154	Hatkar, P., Vinhenkar, D. and Kansara, D.	2019	2010-19	Reptile	Chelonians	3	Yes	No	Yes	No	Yes	1	0.33	0	0	0	0	1	0	0	0	Con	Rescue and Rehabilitation of Loggerhead Sea Turtles Caretta caretta from Dahanu Coast, Maharashtra, India	Marine Turtle Newsletter	156	26-29	Newsletter
1155	Deshmukh, R.V., Deshmukh, S.A. and Badekar, S.A.	2015	2010-19	Reptile	Snakes	3	No	Yes	No	Yes	No	0	0	0	0	0	0	1	0	0	0	Con	Rescued records of snakes from Nagpur District, Maharashtra with data on unrecorded species	Reptile Rap	17	34-43	Newsletter
1156	Roshnath, R., Basheer, A. and Divakar, N.	2015	2010-19	Reptile	Snakes	3	No	Yes	No	Yes	No	0	0	0	0	0	0	0	0	0	1	OT	Rescued Spectacled Cobra Naja naja eggs hatched in captivity	Reptile Rap	17	30-32	Newsletter
1157	Sangha, H.S., Naoroji, R.K. and Sharma, M.	2011	2010-19	Reptile	Snakes	3	No	Yes	No	Yes	No	0	0	0	0	0	1	0	0	0	0	Div	Sighting of King Cobra Ophiophagus hannah in Arunachal Pradesh, India: a new altitude record for north-eastern India	Reptile Rap	11	19-20	Newsletter
1158	Guptha B.M and Rajasekhar, M.	2011	2010-19	Reptile	Snakes	2	No	Yes	No	Yes	No	0	0	0	0	0	1	0	0	0	0	Div	Sighting of Slender Coral Snake Calliophis melanurus in Seshachalam Hills, Eastern Ghats, India: a new record	Reptile Rap	12	2020-06-05	Newsletter
1159	Vyas, R.	2013	2010-19	Reptile	Snakes	1	No	Yes	No	Yes	No	0	0	0	0	0	1	0	0	0	0	Div	Snake diversity and voluntary rescue practice in the cities of Gujarat State, India: an evaluation	Reptile Rap	15	27-39	Newsletter
1160	Shroff, R.	2016	2010-19	Reptile	Lizards	1	No	Yes	No	Yes	No	0	0	0	0	0	1	0	0	0	0	Div	Snakes in an urban environment: a follow up on patterns of snake occurrences in western Ahmedabad after a gap of 15 years	Reptile Rap	16	43-50	Newsletter
1161	Nath, A., Singha, H. and Das, A.	2011	2010-19	Reptile	Snakes	3	No	Yes	No	Yes	No	0	0	0	0	0	1	0	0	0	0	Div	Snakes of Bongaigaon Municipality Area, Assam, India	Reptile Rap	12	9-13	Newsletter
1162	Sagar, U.	2016	2010-19	Herpetofauna	Mixed	1	No	Yes	No	Yes	No	0	0	0	1	0	0	0	0	0	0	Ecol	Some observations on the Malabar Pit Viper Trimeresurus malabaricus in central Western Ghats, India	Reptile Rap	18	36-39	Newsletter
1163	Ganesh, S.R. and Arumugam, M.	2015	2010-19	Herpetofauna	Mixed	2	No	Yes	No	Yes	No	0	0	0	0	0	1	1	0	0	0	DivCon	Status and conservation of montane herpetofauna of Southern Eastern Ghats, India	Zoos' Print	30(9)	18-22	Newsletter
1164	Vyas, R.	2015	2010-19	Reptile	Chelonians	1	No	Yes	No	Yes	No	0	0	0	0	0	1	1	0	0	0	DivCon	Status of Ganges Soft-shell Turtle Nilssonia gangetica amidst deplorable scenarios in urban wetlands of Central Gujarat State, India	Reptile Rap	17	3 -12	Newsletter
1165	Vyas, R. and Desai, S.R.	2010	2010-19	Reptile	Snakes	2	No	Yes	No	Yes	No	0	0	0	0	0	1	0	0	0	0	Div	The record of Beddome's Cat Snake Boiga beddomei from Purna Wildlife Sanctuary, Gujarat State, India	Reptile Rap	10	10-13	Newsletter
1166	Kanagavel, A.	2013	2010-19	Reptile	Snakes	1	No	Yes	No	Yes	No	0	0	0	0	0	1	0	0	0	0	Div	The second ever record of Nikhil's Kukri Oligodon nikhilii (Whitaker & Dattatri, 1982)? Range extension?	Reptile Rap	15	40	Newsletter
1167	Rai, A. and Chettri, B.	2019	2010-19	Herpetofauna	Mixed	2	No	Yes	Yes	No	Yes	1	0.5	0	1	0	1	0	0	0	0	EcolDiv	Tokay Gecko: note on Gekko gecko (Linnaeus, 1758) with its recent sighting in Meghalaya	Reptile Rap	34(3)	11-14	Newsletter
1168	Vyas, R. and Thaker, M.	2017	2010-19	Reptile	Chelonians	2	No	Yes	No	Yes	No	0	0	0	1	0	0	0	0	0	0	Ecol	Turtle Predation: Evidence of partial consumption of adult female Indian Star Tortoise (Geochelone elegans) by Asiatic Lion (Panthera leo persica): account of …	Reptile Rap	32(12)	14-20	Newsletter
1169	Purkayastha, J., Hassan, A.H., Islam, H., Das, J., Sarma, M., Basumatary, M., Sarma, N., Chatterjee, N., Singha, S., Nair, V., Purkayastha, A., Dutta, J. and Das, M.	2013	2010-19	Reptile	Chelonians	13	No	Yes	No	No	Yes	7	0.64	0	0	0	1	0	0	0	0	Div	Turtles of the Temple Pond of Kamakhya, Assam, India	Reptile Rap	15	11-15	Newsletter
1170	Upadhyay, S.N. and Guraya, S.S.	1972	1970-79	Reptile	Lizards	2	No	Yes	No	Yes	No	0	0	0	0	0	0	0	1	0	0	Dev	Histochemical observations on the interstitial gland (or Leydig) cells of the lizard testis	General and comparative endocrinology	19(1)	88-95	Journal article
1171	Kanakambika, P. and Muthukkaruppan, V.R.	1973	1970-79	Reptile	Lizards	2	No	Yes	No	Yes	No	0	0	0	0	0	0	0	1	0	0	Dev	Lymphoid differentiation and organization of the spleen in the lizard,Calotes versicolor	Proceedings of the Indian Academy of Science B	78(1)	37-44	Journal article
1172	Vyas, R., Parasharya, B.M., Jani. J.J.	2012	2010-19	Herpetofauna	Mixed	3	No	Yes	No	Yes	No	0	0	0	0	0	1	0	0	0	0	Div	Herpetofaunal diversity in and around the selected man-made wetlands of central and northern Gujarat, India	Reptile Rap	14	21-26	Newsletter
1173	Hrima, V.L., Sailo, V.L.H., Fanai, Z., Lalronunga, S., Lalrinchhana, C., Zothansiama, and Lalremsanga, H.T.	2014	2010-19	Reptile	Snakes	7	No	Yes	No	Yes	No	0	0	0	1	0	0	0	0	0	0	Ecol	Nesting ecology of the King Cobra, Ophiophagus hannah, in Aizawl District, Mizoram, India	Issues and Trends of Wildlife Conservation in Northeast India, Mizo Academy of Science	NA	268-274	Journal article
1174	Laltanpuia, T.C., Lalrinchhana, C., Lalnunsanga, Lalrotluanga, Hmingthansanga, R., Kumari, A., Renthlei, V., Lalrintluangi, S. and Lalremsanga, H.T.	2008	2000-09	Reptile	Snakes	9	No	Yes	No	Yes	Yes	2	0.22	0	0	0	1	0	0	0	0	Div	Snakes (Reptilia: Serpentes) of Mizoram University Campus, Tanhril, Aizawl with notes on their identification keys	Science Vision	8(4)	112-127	Journal article
1175	Ahmed, R. and Dutta, A.	2001	2000-09	Amphibian	Frogs	2	Yes	No	Yes	No	Yes	1	0.5	0	1	0	1	0	0	0	0	EcolDiv	Ecology and Status of the Anurans fauna of 11 districts of Brahmaputra valley of Assam	Cobra	45	13-31	Journal article
1176	Sahi, D.N., Abrol, B. and Verma A.K.	1996	1990-99	Herpetofauna	Mixed	3	No	Yes	No	Yes	Yes	1	0.33	0	1	0	1	0	0	0	0	Ecol	Ecological notes on the Herpetofauna of Ladakh region in J&K State	Cobra	26	1-9	Journal article
1177	Verma, A.K., Sahi, D.N. and Verma, K.	1995	1990-99	Amphibian	Mixed	3	No	Yes	No	Yes	No	0	0	0	0	0	1	0	0	0	0	Div	The amphibian fauna of Jammu and Kashmir state, India	Cobra	20	2-6	Journal article

## Sheet: Definitions
Parameter		Definitions
Author participation	Author Count	Total number of authors present in the article
	Women_first _author	Whether a woman is the first author
	Men_first_author	Whether a man is the first author
	Women_corresponding	Whether a woman is the corresponding author
	Men_corresponding	Whether a man is the corresponding author
	Women_present	Is there a women present in the list of authors
	Total_Women_authors	The total number of women present in the article
	Women-Men-ratio	The ratio of the total number of women to total number of authors in the article
Subfields	TX	Taxonomy & Systematics
	Ecol	Ecology
	BH	Behavioural ecology
	Div	Diversity & Distribution
	Con	Conservation and Management
	Dev	Development, Physiology & Cytology
	Evol	Evolutionary biology
	OT	Others
